# Supplementary material
Source: MDPI journal article supplement (https://www.mdpi.com/2410-3888/9/1/27)
Supplement: s1 [file s1]

Archive with 2 entries (2 files):
- Supplementary table.xlsx
- Supporting Information.pdf
