# Supplementary material
Source: MDPI journal article supplement (https://www.mdpi.com/2410-3888/9/1/27)
Supplement: s1 [file s1 › Supplementary table.xlsx]

## Sheet: Table S1
Table S1. Lipids contents in discus fish skin mucus (nmol/g).
Compounds	Class I	Class II	Molecular Weight	Ionization model	Formula	MWXS211180J_mix01	MWXS211180J_mix02	MWXS211180J_mix03	MWXS211180J_mix04	P_F_1	P_F_2	P_F_3	P_F_4	P_F_5	P_F_6	P_M_1	P_M_2	P_M_3	P_M_4	P_M_5	P_M_6	NP_F_1	NP_F_2	NP_F_3	NP_F_4	NP_F_5	NP_F_6	NP_M_1	NP_M_2	NP_M_3	NP_M_4	NP_M_5	NP_M_6
Ursodeoxycholicacid	ST	BA	392.292664	[M-H]-	C24H40O4	3712	3776	4000	4160	33280	809.6	4544	1203.2	1305.6	876.8	13152	10144	1270.4	132.16	2886.4	6016	4224	3936	2496	4064	22496	27072	3392	4128	15296	1568	12864	4576
Ursocholicacid	ST	BA	408.287567	[M-H]-	C24H40O5	10816	11456	12576	10432	86400	15360	18720	23168	11264	10048	53120	21344	15424	5504	28352	25792	36800	48000	25280	27040	60480	60480	44800	53440	59200	15872	99520	43200
lithocholicacid-3-sulfate	ST	BA	456.254547	[M-H]-	C24H38O3	3328	3584	3584	3232	15552	2000	2345.6	1593.6	3296	1353.6	7904	3056	2214.4	873.6	4192	3264	5120	6976	3520	3808	7904	9376	6272	8992	9120	2144	18176	7360
Glycocholicacid	ST	BA	465.309052	[M-H]-	C26H43NO6	11200	9632	12032	10432	42880	10048	10208	6688	25824	7424	41280	15136	10784	4096	17344	12896	23200	24064	11808	14656	30976	30272	22496	32960	32960	10752	47360	23168
9,10-EpOME	FA	Eicosanoid	296.2351449	[M-H]-	C18H32O3	393.6	419.2	339.2	406.4	139.52	171.84	132.16	128	135.04	40.32	473.6	240.32	241.92	32	258.24	652.8	1110.4	425.6	387.2	241.28	624	416	393.6	649.6	473.6	496	358.4	534.4
9,10-DiHOME	FA	Eicosanoid	314.2457	[M-H]-	C18H34O4	748.8	800	726.4	694.4	160	112.64	220.8	315.52	282.56	262.08	245.44	311.04	212.16	75.2	569.6	809.6	1827.2	3052.8	492.8	269.12	403.2	736	1468.8	1507.2	665.6	304.64	742.4	1974.4
(±)12-HETE	FA	Eicosanoid	320.2351449	[M-H]-	C20H32O3	3776	3744	3744	3712	2067.2	1596.8	1609.6	1232	1814.4	102.4	3616	3180.8	1920	53.76	982.4	1715.2	14688	3680	5120	3424	6016	3904	2771.2	9824	3936	4608	5248	5856
FFA(10:0)	FA	FFA	172.14633	[M-H]-	C10H20O2	3196.8	2966.4	3292.8	2947.2	8256	4512	4454.4	4732.8	33024	6038.4	5203.2	5107.2	4512	5097.6	5721.6	4387.2	4435.2	4579.2	4128	3936	5174.4	5529.6	6345.6	4982.4	5913.6	3667.2	6220.8	6076.8
FFA(15:0)	FA	FFA	242.22458	[M-H]-	C15H30O2	77.76	76.128	83.328	70.656	81.408	83.232	85.632	74.592	86.208	84	75.552	84.192	72.384	90.816	87.744	80.64	88.032	81.792	70.464	80.352	77.472	90.144	81.504	87.36	84.192	76.032	90.528	83.904
FFA(16:0)	FA	FFA	256.24023	[M-H]-	C16H32O2	456	441.6	472.32	446.4	576	449.28	489.6	408	506.88	456.96	421.44	454.08	427.2	434.88	430.08	452.16	486.72	469.44	394.56	504	441.6	552.96	423.36	487.68	535.68	444.48	409.92	449.28
FFA(18:0)	FA	FFA	284.27153	[M-H]-	C18H36O2	650.88	608.64	622.08	665.28	819.84	638.4	697.92	558.72	665.28	764.16	557.76	635.52	656.64	661.44	637.44	774.72	685.44	645.12	503.04	702.72	868.8	812.16	670.08	568.32	722.88	706.56	478.08	589.44
FFA(22:0)	FA	FFA	340.33413	[M-H]-	C22H44O2	106.56	156.48	123.84	116.16	144.96	120	118.08	125.76	99.84	136.32	108.48	118.08	95.232	120	126.72	147.84	114.24	108.48	92.064	103.68	126.72	119.04	125.76	123.84	118.08	136.32	130.56	104.64
FFA(16:1)	FA	FFA	254.22458	[M-H]-	C16H30O2	8.112	6.432	9.4752	7.6032	8.0256	9.0624	8.2464	6.288	8.1312	8.5248	6.432	6.6048	6.2496	7.6704	8.3808	7.5744	8.4096	7.3824	6.4608	8.5248	7.1328	8.256	7.7472	7.9008	8.6304	8.8704	8.544	6.6336
FFA(18:1)	FA	FFA	282.25588	[M-H]-	C18H34O2	13.92	13.824	14.496	11.328	29.952	20.736	14.784	11.04	16.992	14.208	10.272	14.4	27.648	15.552	15.84	22.56	21.408	11.712	15.168	20.16	17.664	20.832	12	21.504	20.256	16.032	16.512	12.48
FFA(19:1)	FA	FFA	296.27153	[M-H]-	C19H36O2	11.328	10.08	10.848	9.888	14.016	10.848	9.792	11.232	13.248	16.608	12	12.576	13.536	14.496	11.616	14.784	11.136	13.056	11.232	10.752	9.0144	13.92	12.864	14.592	11.52	11.712	11.424	12.288
FFA(18:2)	FA	FFA	280.24023	[M-H]-	C18H32O2	8.2752	7.5264	8.4864	12.288	11.616	8.544	7.2768	6.8928	8.7744	9.984	5.9136	11.424	13.248	13.344	9.984	17.952	14.304	8.8608	10.176	16.896	14.304	17.76	14.4	13.344	15.648	9.696	18.336	8.9472
FFA(22:3)	FA	FFA	334.28718	[M-H]-	C22H38O2	8.064	6.912	8.0256	6.7392	6.1824	6.288	5.8464	7.1712	4.8	9.1872	5.8848	7.968	7.0848	8.1216	7.152	8.1408	8.2848	5.7888	6.8064	6.2208	6.3552	6.3648	7.4976	5.5584	5.5584	7.4592	6.0864	7.5072
FFA(24:4)	FA	FFA	360.30283	[M-H]-	C24H40O2	28.8	24.768	30.912	23.232	28.896	25.632	28.8	25.248	20.736	25.44	25.248	28.416	23.04	18.72	28.608	24	33.312	29.76	26.304	33.984	31.872	28.32	24.96	33.984	26.688	30.912	23.904	26.88
FFA(22:5)	FA	FFA	330.25588	[M-H]-	C22H34O2	2.0736	1.9968	2.2368	1.9104	1.4112	1.2384	0.8688	1.5936	1.2288	1.9968	1.1712	1.4976	1.5648	1.5168	1.9296	2.2368	1.6512	1.9872	3.6384	3.4464	2.8992	2.3136	3.7344	3.3408	2.0928	2.8224	2.6976	1.8144
FFA(24:6)	FA	FFA	356.27153	[M-H]-	C24H36O2	21.12	37.824	38.208	28.704	42.72	28.896	29.472	32.736	30.624	39.552	26.88	29.28	31.104	36.192	33.312	40.608	29.28	28.032	32.928	31.2	27.84	31.872	24.576	30.72	27.36	36.672	28.8	29.472
LPG(18:1)	GP	LPG	510.295772	[M-H]-	C24H47O9P	36.32	35.84	30.56	36.96	31.04	38.24	32	32.96	26.4	34.56	30.08	38.88	33.12	38.56	31.84	36	32.48	32.32	32	30.88	32.48	31.68	38.4	32.96	30.72	40.48	31.68	34.56
PC(14:0_14:0)	GP	PC	677.499556	[M+COOH]-	C36H72NO8P	43.52	35.2	36.48	43.2	27.104	36.48	29.952	39.68	32.96	33.92	42.88	46.08	36.16	40	37.12	40.64	38.08	41.6	43.52	36.8	50.24	41.28	44.48	41.92	35.2	38.72	46.72	38.08
PC(16:0_16:0)	GP	PC	733.562156	[M+COOH]-	C40H80NO8P	202.88	250.56	198.72	198.4	143.68	282.88	76.48	79.04	83.52	40	145.6	194.24	90.24	39.68	77.12	195.2	329.6	269.76	377.6	287.36	272	248.96	444.8	432	161.92	313.92	245.76	190.72
PC(18:0_14:0)	GP	PC	733.562156	[M+COOH]-	C40H80NO8P	69.76	123.84	85.12	94.4	104.96	93.44	80.96	91.2	80.32	121.92	70.4	65.28	125.76	115.84	82.56	120	107.52	100.16	96.32	86.4	100.8	92.8	109.44	72.64	87.36	91.84	106.24	93.12
PC(14:0_16:1)	GP	PC	703.515206	[M+COOH]-	C38H74NO8P	12.384	8.32	11.04	12.896	12.864	13.824	15.456	9.216	11.168	13.984	13.472	18.016	15.232	15.648	13.792	13.216	9.76	8.256	12.48	8.576	14.624	12.992	12.64	12.736	13.984	14.016	11.456	10.208
PC(16:0_16:1)	GP	PC	731.546506	[M+COOH]-	C40H78NO8P	87.36	124.48	113.6	80.96	148.48	259.2	56.96	53.44	62.72	7.264	130.88	144.64	134.72	5.632	79.04	140.8	75.52	152.96	139.2	96.96	159.04	107.2	129.6	105.6	56.96	146.24	112.32	69.12
PC(14:0_18:1)	GP	PC	731.546506	[M+COOH]-	C40H78NO8P	12736	17440	13184	14656	16992	14752	15136	15200	13472	14368	13920	14048	16064	13472	11840	15904	15776	15264	15808	15392	18720	15104	15712	13056	14016	14304	15712	16544
PC(16:0_18:1)	GP	PC	759.577806	[M+COOH]-	C42H82NO8P	872	827.2	1038.4	854.4	1123.2	2016	801.6	803.2	769.6	259.2	1300.8	753.6	1256	324.8	825.6	1448	696	1104	817.6	924.8	665.6	536	576	969.6	726.4	1028.8	768	516.8
PC(17:0_18:1)	GP	PC	773.593456	[M+COOH]-	C43H84NO8P	14.784	20.32	37.76	20.48	26.88	21.12	16.32	16.96	24.64	8.88	30.24	17.28	24.48	14.384	21.76	33.92	24.32	20.32	23.2	39.52	25.12	26.72	20.96	19.52	20.16	34.4	21.12	13.984
PC(18:0_18:1)	GP	PC	787.609106	[M+COOH]-	C44H86NO8P	201.6	203.2	251.2	220.8	284.8	497.6	219.2	185.6	249.6	10.128	360	219.2	352	13.2	243.2	624	164.8	225.6	151.68	190.4	113.12	87.52	66.4	164.8	139.84	184	100.48	94.08
PC(16:0_18:2)	GP	PC	757.562156	[M+COOH]-	C42H80NO8P	133.44	157.6	196.8	172.8	152.48	272	179.2	117.12	172.8	25.6	224	121.12	358.4	10.784	230.4	544	72.16	206.4	77.92	146.88	92	56.16	74.72	87.68	192	203.2	163.2	77.92
PC(17:1_18:1)	GP	PC	771.577806	[M+COOH]-	C43H82NO8P	58.72	65.92	63.2	75.04	70.72	70.56	74.08	78.4	85.44	49.76	69.6	69.28	66.88	71.04	57.44	60.64	62.24	70.08	60.96	78.08	51.36	69.6	63.2	67.2	64.96	63.2	65.12	51.36
PC(18:1_18:1)	GP	PC	785.593456	[M+COOH]-	C44H84NO8P	129.12	116	150.4	116.32	135.68	132.32	132	151.36	174.4	121.12	99.04	105.12	114.56	151.84	134.4	87.68	129.76	146.88	128.32	159.04	124.8	158.4	179.2	137.76	155.84	136.48	131.84	148
PC(18:0_18:2)	GP	PC	785.593456	[M+COOH]-	C44H84NO8P	86.72	78.72	109.92	79.2	36.8	112.16	92.96	62.72	138.08	10.16	124	71.52	275.2	18.08	192	472	32.64	44.64	36.48	77.76	36.8	25.44	26.72	29.76	112.64	79.2	56.64	36.16
PC(18:1_18:2)	GP	PC	783.577806	[M+COOH]-	C44H82NO8P	63.04	59.36	66.72	62.24	39.68	90.24	49.92	58.4	74.4	9.12	100.32	41.92	219.2	6.72	88.48	395.2	11.792	35.68	19.68	19.04	23.04	7.504	15.488	9.056	45.44	24.16	16.64	12.992
PC(16:0_20:4)	GP	PC	781.562156	[M+COOH]-	C44H80NO8P	220.8	259.2	331.2	262.4	440	676.8	198.4	238.4	140.32	13.792	345.6	240	352	22.08	212.8	427.2	151.52	569.6	342.4	379.2	225.6	108.48	163.2	179.2	188.8	296	294.4	136.8
PC(18:0_20:4)	GP	PC	809.593456	[M+COOH]-	C46H84NO8P	182.4	176	228.8	203.2	240	414.4	212.8	200	160	11.584	276.8	203.2	264	8.64	180.8	529.6	149.76	260.8	262.4	339.2	123.68	59.84	104	159.84	172.8	259.2	158.72	99.2
PC(18:2_20:4)	GP	PC	805.562156	[M+COOH]-	C46H80NO8P	45.28	38.56	48.48	32.8	39.68	75.52	34.24	44.48	41.44	1.824	73.28	48	158.56	3.712	46.56	185.6	8.096	29.76	22.24	29.92	12.24	6.288	18.88	4.336	36.32	25.6	10.656	19.68
PC(18:1_22:5)	GP	PC	833.593456	[M+COOH]-	C48H84NO8P	12.368	10.656	21.28	14.688	25.28	12.464	14.32	13.536	18.56	24.48	17.28	9.568	19.68	27.52	15.568	19.04	20.48	21.12	17.12	9.088	19.68	19.04	13.904	14.656	16.8	14.144	23.52	15.68
PE(18:1_18:0)	GP	PE	745.562156	[M-H]-	C41H80NO8P	2.816	3.12	3.152	3.2	4.464	7.04	1.952	2.192	1.984	0.8752	7.936	8.544	4.24	0.6784	3.072	12.144	1.744	2.256	1.664	0.8688	0.8176	0.808	1.1248	3.552	1.2	1.376	1.0064	1.3808
PE(18:1_16:1)	GP	PE	715.515206	[M-H]-	C39H74NO8P	2.272	2.56	1.808	1.1984	2.192	1.936	1.824	1.728	1.84	2.144	2.272	1.3584	1.856	2.272	0.92	1.4384	1.792	2.976	2.416	1.984	2.064	1.1616	2.224	1.5696	2.08	1.5952	2.048	1.968
PE(18:1_18:1)	GP	PE	743.546506	[M-H]-	C41H78NO8P	12.768	12.896	10.736	12.928	12.96	12.4	13.68	11.84	11.024	9.616	14.832	15.104	14.336	8.96	10.032	16.8	10.864	13.04	11.52	12.288	12.464	9.872	9.664	10.272	12.096	8.832	11.024	10.464
PE(18:0_18:2)	GP	PE	743.546506	[M-H]-	C41H78NO8P	3.024	3.12	2.512	3.008	1.2352	5.104	2.192	2.24	3.024	1.4096	4.368	4.048	7.104	0.7824	2.656	16.32	1.2272	1.92	0.6832	1.3008	0.8928	0.5696	1.5248	1.1488	1.3104	1.4848	0.848	0.952
PE(14:0_18:3)	GP	PE	685.468256	[M-H]-	C37H68NO8P	3.472	3.664	2.88	4.544	2.768	3.456	3.888	2.56	3.072	2.352	2.672	2.784	3.184	4.096	3.872	2.88	2.816	3.824	3.088	2.208	3.328	2.944	2.176	3.376	3.504	3.152	3.648	3.056
PE(16:0_20:4)	GP	PE	739.515206	[M-H]-	C41H74NO8P	8.368	12.976	9.616	9.104	14.256	31.68	7.248	8.32	4.176	0.1744	18.24	18.4	12.72	0.728	12.608	32.32	6.752	11.488	6.816	10.48	6.576	4.88	6.8	10.224	7.12	5.68	7.616	4.736
PE(20:4_18:0)	GP	PE	767.546506	[M-H]-	C43H78NO8P	18.24	21.12	20.8	20	20.64	66.08	17.12	15.792	10.656	1.968	39.84	51.2	40.32	1.84	27.2	95.2	7.072	16.48	11.856	9.248	5.056	4.56	7.6	13.024	9.664	7.808	7.92	7.84
PE(18:0_22:4)	GP	PE	795.577806	[M-H]-	C45H82NO8P	6.032	6.624	5.984	6.624	8.272	19.84	3.712	4.8	4.784	1.4672	9.008	9.984	11.632	0.6688	8.624	24.48	3.504	5.968	3.232	3.936	3.552	2.288	3.056	4.208	1.984	2.56	1.936	2.896
PE(14:0_22:6)	GP	PE	735.483906	[M-H]-	C41H70NO8P	2.496	2.848	2.72	4.096	3.408	3.44	3.664	3.232	2.896	3.84	4.32	2.448	3.808	2.56	3.296	4.8	3.136	2.944	2.992	4.096	3.872	3.952	3.104	3.184	3.472	3.76	3.808	3.584
PE(22:6_18:0)	GP	PE	791.546506	[M-H]-	C45H78NO8P	12.08	11.392	10.928	12.816	25.44	30.08	7.344	12.192	8.656	1.3728	17.12	25.92	16.48	2.128	18.4	42.72	7.312	18.24	14.32	7.472	9.36	4.192	9.04	13.408	9.904	5.936	9.968	8.608
PG(16:0_16:0)	GP	PG	722.509787	[M-H]-	C38H75O10P	9.344	9.248	10.016	8.96	8.928	9.696	8.672	9.504	8.128	10.08	8.16	7.168	9.312	8.896	8.352	9.888	8.256	8.672	8.48	9.664	9.6	9.088	8.864	8.48	9.024	8.576	8.704	10.08
PG(16:0_18:1)	GP	PG	748.525437	[M-H]-	C40H77O10P	21.056	20.224	17.952	20.64	18.08	24.736	16.48	21.6	16.992	13.664	19.296	16.48	19.776	15.808	18.88	20.672	20.16	17.408	19.2	15.008	16.928	14.528	14.816	21.088	19.776	21.088	16.608	16.832
PG(18:0_18:1)	GP	PG	776.556737	[M-H]-	C42H81O10P	224.32	298.24	220.16	241.28	240.96	199.68	215.68	225.28	241.6	237.76	228.16	240.64	219.84	237.76	219.2	222.4	231.68	216.64	262.08	254.4	218.56	262.72	214.72	250.88	228.8	220.48	214.08	267.2
PG(18:1_16:1)	GP	PG	746.509787	[M-H]-	C40H75O10P	22.56	25.76	27.04	24.064	31.168	23.744	27.68	29.696	30.528	22.816	27.488	27.008	23.872	25.888	25.312	27.552	30.816	28.352	29.184	24.384	29.888	32.64	25.28	31.552	23.552	27.648	26.688	30.56
PI(16:0_18:1)	GP	PI	836.541482	[M-H]-	C43H81O13P	297.6	276	280.8	295.2	283.2	316.8	292.8	326.4	261.6	700.8	393.6	319.2	525.6	525.6	364.8	446.4	340.8	326.4	278.4	304.8	352.8	288	422.4	312	292.8	261.6	314.4	297.6
PI(17:1_18:1)	GP	PI	848.541482	[M-H]-	C44H81O13P	68.16	76.8	71.76	56.88	105.36	83.04	63.36	109.68	59.52	185.04	75.12	104.16	121.2	134.88	83.04	80.4	78.72	74.4	64.08	95.28	82.56	88.8	113.04	75.36	64.32	62.16	64.08	86.64
PI(18:1_18:1)	GP	PI	862.557132	[M-H]-	C45H83O13P	288	268.8	244.8	290.4	324	266.4	256.8	300	214.08	645.6	319.2	314.4	482.4	595.2	326.4	446.4	420	292.8	300	280.8	393.6	302.4	480	324	312	264	345.6	350.4
PI(18:1_18:2)	GP	PI	860.541482	[M-H]-	C45H81O13P	42	55.92	49.68	46.56	53.76	38.16	59.04	50.4	38.16	62.88	73.92	54.72	60.24	90	48	74.16	50.64	48.48	49.68	54.48	69.12	55.44	62.4	50.64	37.2	41.28	54.24	56.64
PI(18:0_20:4)	GP	PI	886.557132	[M-H]-	C47H83O13P	220.32	240	201.84	230.4	357.6	736.8	192.24	259.2	228.72	28.08	525.6	364.8	708	36.24	460.8	919.2	30.96	254.4	110.64	75.36	43.68	14.232	126.24	67.92	75.84	101.52	34.08	21.768
PS(16:0_16:0)	GP	PS	735.505036	[M-H]-	C38H74NO10P	135.68	144	108.16	123.52	196.48	90.88	139.52	130.56	113.92	97.28	100.48	142.72	177.28	135.04	99.2	110.72	108.8	131.84	106.88	73.6	121.6	128.64	72.96	158.72	155.52	110.08	148.48	128.64
PS(18:0_18:0)	GP	PS	791.567636	[M-H]-	C42H82NO10P	173.44	162.24	177.92	201.28	296.96	512	130.88	211.84	58.56	16.416	284.16	496	348.8	65.6	265.6	755.2	133.12	259.84	240.64	137.6	192.32	94.72	124.16	297.28	143.68	88	166.4	138.24
PS(17:0_16:1)	GP	PS	747.505036	[M-H]-	C39H74NO10P	25.504	36.8	18.592	31.968	29.088	44.8	43.84	49.28	19.136	80.96	34.56	18.624	64.96	85.76	44.16	39.68	35.84	27.168	48	38.08	39.36	33.6	36.48	29.632	28.448	26.848	30.016	43.2
PS(16:0_18:1)	GP	PS	761.520686	[M-H]-	C40H76NO10P	141.76	122.56	121.28	193.28	172.8	272.96	149.44	169.28	94.72	26.848	296.64	241.92	83.84	56.96	147.2	241.6	169.92	182.08	180.48	113.28	133.44	157.44	74.56	300.16	87.68	131.84	157.44	89.6
PS(18:1_19:0)	GP	PS	803.567636	[M-H]-	C43H82NO10P	97.92	95.04	123.52	108.48	124.8	124.8	146.56	136	84.48	171.52	197.76	116.16	157.44	307.52	131.2	209.28	117.44	115.84	126.72	115.84	176.32	155.52	138.56	161.92	108.16	95.36	116.8	145.28
PS(18:0_22:6)	GP	PS	835.536336	[M-H]-	C46H78NO10P	332.8	306.56	323.2	358.4	288.64	284.48	174.4	215.36	150.4	27.104	252.48	444.8	467.2	21.6	199.04	921.6	255.36	489.6	825.6	508.8	457.6	438.4	563.2	572.8	312.32	345.6	308.16	273.28
CerP(d18:1/20:3)	SP	CerP	667.494076	[M-H]-	C38H70NO6P	35.92	34.92	35.52	38.92	37.36	46.8	25.72	25.88	25.44	25.16	51.2	34.96	41.6	48.4	43.6	47.2	38.68	22.88	30.56	39.16	88	55.2	41.2	39.72	30.6	20.8	57.6	40.4
LPA(16:0)	GP	LPA	410.24334	[M-H]-	C19H39O7P	21.28	25.44	23.56	24.16	36.64	20.12	25.44	26.04	16.24	71.2	38.44	19.28	44.8	62.4	27.32	40.8	31.84	28.68	21.8	22.2	62	39.24	38.76	26.84	29.4	19.4	51.2	29.24
LPA(20:5)	GP	LPA	456.227692	[M-H]-	C23H37O7P	10.96	10.84	9.76	10.72	14.52	9.92	7.64	10.44	14	20.24	15.68	10.52	15.12	21.32	12.4	13	13.24	11.6	10.68	10.72	21.28	17.44	17.6	13.08	13.76	7.64	20.12	11.28
LPG(15:0)	GP	LPG	470.264472	[M-H]-	C21H43O9P	5.392	4.64	5.168	4.24	5.488	7.616	4.224	4.64	2.592	7.904	6.272	5.216	6.784	10.512	5.072	5.968	4.848	5.552	5.28	3.728	4.56	3.728	5.696	3.504	6.832	5.968	4.064	5.2
FFA(19:0)	FA	FFA	298.28718	[M-H]-	C19H38O2	82.176	80.448	91.392	85.632	39.744	86.88	88.8	76.224	170.88	178.56	71.904	46.464	95.52	71.616	54.624	120	61.44	84.96	62.496	63.744	34.08	175.68	120.96	45.408	59.808	146.88	81.12	119.04
FFA(26:0)	FA	FFA	396.39673	[M-H]-	C26H52O2	24.768	23.136	25.152	22.944	23.904	23.712	26.016	16.992	25.152	19.104	20.352	24	21.696	23.424	27.936	18.048	22.368	22.752	22.752	27.36	21.696	28.224	28.128	22.272	26.496	24.48	20.16	23.424
FFA(28:0)	FA	FFA	424.42803	[M-H]-	C28H56O2	71.52	65.664	78.144	71.52	77.856	76.608	67.968	64.8	74.688	65.28	64.608	77.184	64.608	68.544	74.112	68.832	77.088	69.888	69.696	75.84	77.76	71.904	70.752	69.792	70.176	67.488	69.216	61.632
FFA(29:0)	FA	FFA	438.44368	[M-H]-	C29H58O2	32.832	28.608	30.144	27.552	26.784	25.44	23.328	28.032	28.704	25.92	23.328	25.44	28.704	25.824	30.24	28.416	28.512	25.92	31.104	30.048	31.776	26.4	24.48	32.832	29.952	26.304	23.712	13.92
FFA(30:0)	FA	FFA	452.45933	[M-H]-	C30H60O2	33.12	32.448	28.8	31.104	43.008	35.712	36.768	26.784	33.024	25.44	26.976	36.192	26.304	29.088	34.272	28.224	33.6	28.704	28.32	35.616	35.424	38.976	31.584	30.432	30.816	33.408	25.056	8.9568
FFA(21:1)	FA	FFA	324.30283	[M-H]-	C21H40O2	11.04	10.368	9.3696	8.2848	3.2736	10.272	13.92	8.352	18.72	14.304	9.0144	6.0576	9.984	9.5424	3.1296	14.784	10.176	8.1408	6.3456	6.9888	5.088	19.872	13.344	4.8192	3.8976	16.128	8.5248	15.744
FFA(30:1)	FA	FFA	450.44368	[M-H]-	C30H58O2	21.216	23.136	25.152	20.16	27.648	24.48	19.776	22.464	21.792	26.016	19.488	23.712	24	20.352	25.056	25.632	23.232	20.832	22.56	24.288	28.704	22.848	24	23.232	21.696	24	24.384	20.64
FFA(32:1)	FA	FFA	478.47498	[M-H]-	C32H62O2	23.904	19.968	25.728	22.656	28.704	33.792	25.824	25.824	30.816	20.928	23.04	29.376	23.904	24	32.544	25.152	27.552	23.616	23.808	27.36	26.688	24.192	27.456	24.672	31.104	27.168	20.832	11.712
FFA(21:2)	FA	FFA	322.28718	[M-H]-	C21H38O2	5.76	6.4224	6.6048	7.2288	4.1376	4.7616	6.2592	7.1328	12.864	15.264	5.0976	3.0624	8.1504	4.9632	5.6064	10.656	6.3072	5.2608	4.9728	3.9552	3.0336	12.288	9.2736	2.5344	4.9152	13.152	5.5008	14.112
FFA(32:6)	FA	FFA	468.39673	[M-H]-	C32H52O2	80.832	90.048	70.272	70.464	67.104	63.744	75.552	74.88	61.152	120	48.096	48.096	52.032	77.664	83.904	73.44	84.192	66.816	76.32	89.856	99.84	82.464	93.504	84	86.592	79.68	85.344	90.432
FFA(34:6)	FA	FFA	496.42803	[M-H]-	C34H56O2	61.632	65.568	58.08	58.656	75.072	28.128	51.744	64.128	53.856	98.88	26.4	50.016	51.648	71.616	88.8	48.768	64.32	42.912	53.952	87.264	67.008	83.904	78.336	69.216	49.44	82.848	56.448	86.688
PE(O-16:1_16:0)	GP	PE-O	675.520291	[M-H]-	C37H74NO7P	5.888	5.568	5.664	6.016	8.208	13.456	2.384	2.144	3.68	0.3872	6.832	10.656	2.624	0.4048	1.2704	8.096	7.968	6.368	6.176	5.296	6.976	4.832	3.904	23.84	2.304	5.888	3.792	1.4688
PE(O-16:0_18:1)	GP	PE-O	703.551591	[M-H]-	C39H78NO7P	3.648	3.2	2.736	3.424	6.208	7.28	3.712	3.072	3.616	0.1968	7.632	3.344	7.552	0.2048	3.408	8.208	1.0832	2.96	1.2672	0.88	1.3728	1.0288	0.7376	2.592	1.304	0.808	1.68	1.2752
PE(O-16:1_18:1)	GP	PE-O	701.535941	[M-H]-	C39H76NO7P	78.72	83.68	74.88	76.16	166.4	200	85.44	89.92	98.88	4.832	200	93.6	204.8	9.088	100.32	225.6	25.12	79.52	41.6	23.04	28.8	23.04	14.064	71.52	37.92	24.32	48.96	34.24
PE(O-20:1_18:1)	GP	PE-O	757.598541	[M-H]-	C43H84NO7P	0.6144	0.5424	0.5216	0.6256	0.7056	0.816	0.9792	0.6208	0.7104	0.09184	1.36	0.14192	2.544	0.13904	1.2496	1.872	0.14848	0.2528	0.0896	0.192	0.2864	0.15648	0.09168	0.4416	0.14176	0.0704	0.232	0.192
PE(O-18:1_18:2)	GP	PE-O	727.551591	[M-H]-	C41H78NO7P	6.88	6.432	7.824	7.808	3.632	5.328	7.536	5.28	5.536	0.784	8.624	4.064	32.64	1.0592	28.32	24.64	3.968	4.048	1.808	1.3712	3.168	1.632	2.128	4.016	4.256	2.048	4.704	2.896
PE(O-16:0_20:4)	GP	PE-O	725.535941	[M-H]-	C41H76NO7P	7.792	7.088	7.488	7.616	8.368	28.64	9.568	7.2	7.168	0.768	18.88	7.824	23.2	0.1824	3.584	17.28	4.192	4.656	4.672	3.744	3.344	4.896	1.2784	7.696	3.408	7.36	7.248	4.688
PE(O-16:1_20:3)	GP	PE-O	725.535941	[M-H]-	C41H76NO7P	33.6	32.16	28.48	37.92	20.96	60.32	49.12	36.32	36.32	2.592	50.4	39.68	114.56	3.76	40.8	117.44	13.76	25.92	12.32	6.416	11.808	6.256	5.856	24.48	19.2	6.816	11.776	14.08
PE(O-18:0_20:4)	GP	PE-O	753.567241	[M-H]-	C43H80NO7P	3.296	2.624	2.976	2.256	2.368	6.816	2.064	2.048	1.616	0.3216	3.504	2.768	4.256	0.09968	2.096	5.696	2.336	3.728	2.192	2.032	1.904	1.68	2.704	3.504	2.928	1.4736	4.192	2.32
PE(O-18:1_20:3)	GP	PE-O	753.567241	[M-H]-	C43H80NO7P	1.888	1.696	1.776	2.016	1.744	4.288	1.3616	1.2464	0.7728	0.12432	2.32	1.904	2.944	0.2272	1.904	3.536	1.5968	2.976	1.1744	1.904	1.128	1.0656	1.1104	2.304	1.48	0.8624	2.848	1.3232
PE(O-15:1_20:4)	GP	PE-O	709.504641	[M-H]-	C40H72NO7P	4.24	6.768	4.56	7.136	5.312	14.112	6.512	3.776	3.328	0.7008	13.104	9.392	12.768	0.2544	2.752	24.16	3.552	4.72	2.448	6.032	4.176	3.472	2.896	7.952	4.448	2.288	7.152	4.752
PE(O-16:1_20:4)	GP	PE-O	723.520291	[M-H]-	C41H74NO7P	212.8	232	211.2	225.6	305.6	987.2	270.4	182.4	169.6	18.4	505.6	300.8	481.6	14.8	154.56	592	124.32	235.2	151.36	122.24	89.12	72.16	87.2	209.6	128.48	134.56	220.8	145.28
PE(O-20:5_16:0)	GP	PE-O	723.520291	[M-H]-	C41H74NO7P	3.488	4.336	3.808	3.008	3.968	2.896	3.936	3.68	2.256	4.464	4.176	3.808	4.4	4.752	4.944	5.088	4.656	4.464	3.68	3.536	2.944	4.656	3.44	2.576	2	3.28	4.016	4.864
PE(O-17:1_20:4)	GP	PE-O	737.535941	[M-H]-	C42H76NO7P	12.528	11.872	13.392	13.536	4.912	18.72	12.784	8.112	10.656	3.088	19.52	24.48	29.28	0.8736	15.312	65.28	10.304	8.24	5.248	7.424	9.664	6.592	10.144	10.96	17.28	6.992	9.744	10.816
PE(O-18:1_20:4)	GP	PE-O	751.551591	[M-H]-	C43H78NO7P	63.2	63.04	67.84	65.6	61.44	161.6	53.12	44	31.36	5.168	84	65.44	114.88	4.016	70.24	136	59.52	104.96	51.2	56.64	45.76	40	61.44	92.96	58.24	40.32	99.2	56.96
PE(O-17:1_22:4)	GP	PE-O	765.567241	[M-H]-	C44H80NO7P	2.416	2.608	2.752	2.992	3.232	3.488	2	2.16	1.76	0.2736	3.344	3.664	5.184	0.2928	5.232	7.216	1.648	3.36	1.648	1.4016	1.664	2.4	3.36	3.552	1.2224	1.3696	2.656	2.272
PE(O-18:1_22:4)	GP	PE-O	779.582891	[M-H]-	C45H82NO7P	30.08	30.08	27.36	31.2	38.24	39.84	23.52	29.44	25.12	3.728	22.88	16.96	87.68	6.336	110.72	78.4	15.92	31.52	16.8	20.8	14.64	15.776	20.16	30.72	16.48	13.424	29.44	24.64
PE(O-16:1_24:4)	GP	PE-O	779.582891	[M-H]-	C45H82NO7P	6.688	6.048	7.424	6.8	5.68	29.12	11.456	5.888	6.496	0.6	17.44	15.12	16.48	0.2144	4.896	22.88	5.008	4.448	3.328	2.544	3.6	2.784	2.08	5.904	2.368	2.8	3.328	2.496
PE(O-20:1_22:4)	GP	PE-O	807.614191	[M-H]-	C47H86NO7P	2.912	2.384	2.352	2.96	3.056	2.048	2.912	3.136	2.88	0.3504	3.552	0.9136	16.16	0.6032	8.352	8.992	0.416	1.016	0.376	0.8208	0.5088	0.656	0.3296	1.1168	0.7344	0.304	1.4064	0.9744
PE(O-16:1_20:5)	GP	PE-O	721.504641	[M-H]-	C41H72NO7P	2.416	2.368	1.2512	2.704	1.824	3.264	3.104	2.128	1.808	0.5472	3.504	4.528	6.368	0.12432	2.544	7.04	0.3008	2.64	0.9808	1.304	0.9088	0.7792	2.464	1.728	0.7168	0.496	0.3008	1.1232
PE(O-18:2_20:4)	GP	PE-O	749.535941	[M-H]-	C43H76NO7P	7.984	8.176	10.208	11.024	6.496	37.6	6.128	5.728	3.136	0.2384	14.048	15.088	12.784	0.10304	4.272	22.08	2.608	13.152	11.408	7.728	3.552	4.08	11.072	8.496	6.944	5.712	9.712	8.672
PE(O-16:1_22:5)	GP	PE-O	749.535941	[M-H]-	C43H76NO7P	68.16	70.88	62.08	73.12	166.4	123.04	66.56	97.12	103.52	5.184	116	63.52	152.8	5.232	57.76	113.92	31.68	67.04	75.04	50.88	39.36	30.56	40.96	59.52	42.08	30.4	45.12	43.68
PE(O-18:1_22:5)	GP	PE-O	777.567241	[M-H]-	C45H80NO7P	5.664	6.064	5.856	5.568	6.416	7.76	2.608	3.68	3.36	0.4528	3.36	2.544	10.192	0.5024	15.328	14.432	1.808	8.304	4.688	5.888	2.528	2.736	5.424	7.664	6.192	3.536	9.136	6.512
PE(O-16:1_22:6)	GP	PE-O	747.520291	[M-H]-	C43H74NO7P	73.6	76.8	76.96	77.76	115.68	83.36	52	84.16	65.44	4.88	108	96.32	180.8	6.56	113.28	299.2	23.68	88.16	95.2	48.48	45.28	26.56	48	79.84	39.68	32.96	56.48	52.16
PE(O-18:1_22:6)	GP	PE-O	775.551591	[M-H]-	C45H78NO7P	19.04	20.8	20.32	19.36	23.04	21.92	11.232	20.48	11.632	1.2048	13.264	19.2	38.72	2.272	33.44	40.96	16.8	30.88	27.36	20.96	17.44	15.12	25.92	36.48	18.08	12.592	23.36	24.8
PMeOH(14:0_16:0)	GP	PMeOH	634.457357	[M-H]-	C34H67O8P	1.08	1.5	1.46	1.356	1.18	1.284	1.26	1.524	1.716	1.624	1.824	2.088	1.968	1.956	1.08	1.684	1.324	1.688	1.472	1.416	1.4	1.5	1.108	1.672	1.212	1.132	1.512	0.952
PMeOH(15:0_16:0)	GP	PMeOH	648.473007	[M-H]-	C35H69O8P	1.732	1.628	2.424	1.892	2.348	2.332	2.204	2.016	2.332	2.52	2.772	2.332	1.912	2.704	2.344	2.26	1.832	2.56	2.584	2.116	2.216	2.32	2.384	2.004	2.576	1.764	2.408	2.44
PMeOH(16:0_22:4)	GP	PMeOH	738.519957	[M-H]-	C42H75O8P	0.576	0.64	0.552	0.692	0.556	0.536	0.956	0.816	0.748	0.74	0.772	0.528	0.688	0.836	0.668	0.868	0.3212	0.3532	0.484	0.472	0.696	0.752	0.752	0.7	0.656	0.552	0.524	0.2844
PMeOH(16:0_22:5)	GP	PMeOH	736.504307	[M-H]-	C42H73O8P	1.28	1.448	1.732	1.732	1.612	1.548	1.372	1.368	1.368	1.072	1.372	1.76	1.704	1.656	1.844	1.732	1.324	1.704	2.028	1.616	1.452	2.068	1.888	1.568	1.464	1.212	1.728	1.656
PC(14:0_15:0)	GP	PC	691.5152053	[M+COOH]-	C37H74NO8P	29.184	21.792	26.88	31.808	26.688	26.016	31.712	23.264	28.576	29.504	20.032	24.192	25.952	27.808	24.032	29.92	24.256	22.048	28.576	27.168	29.152	31.328	25.856	29.056	33.92	24.768	25.408	24.128
CarnitineC2:0	FA	CAR	203.115759	[M+H]+	C9H17NO4	2.3808	2.608	2.608	2.7488	0.864	0.7744	0.7136	0.3488	30.464	1.3408	0.5408	0.4032	0.4576	0.12576	0.09376	0.27776	0.6592	0.4992	0.23584	0.7136	0.5152	0.24256	0.18944	0.27168	0.448	0.48	0.3616	0.4096
CarnitineC3:0	FA	CAR	217.131409	[M+H]+	C10H19NO4	0.6976	0.8	0.7296	0.8064	0.848	0.352	0.23072	0.2208	7.936	0.832	0.3616	0.31264	0.3424	0.26816	0.17792	0.2784	0.8192	0.3552	0.25952	0.3744	0.29248	0.28768	0.3488	0.30112	0.23936	0.3456	0.4928	0.2512
CarnitineC5:0	FA	CAR	245.162709	[M+H]+	C12H23NO4	9.152	10.304	9.536	9.856	14.752	10.816	10.912	12.928	8.992	26.08	11.776	10.496	18.176	18.976	13.76	17.728	13.216	14.56	10.592	12.576	13.728	13.696	20	12.96	13.856	9.664	11.808	12.768
CarnitineC4-OH	FA	CAR	247.141974	[M+H]+	C11H21NO5	0.06976	0.09344	0.08032	0.08192	0.11328	0.10752	0.0896	0.1232	0.08544	0.25088	0.10464	0.13248	0.1792	0.16096	0.14848	0.18176	0.12928	0.13408	0.09088	0.10944	0.12256	0.11296	0.19552	0.12256	0.1072	0.12768	0.10304	0.10816
CarnitineC8:0	FA	CAR	287.209659	[M+H]+	C15H29NO4	0.1024	0.11808	0.12224	0.12672	0.26528	0.2128	0.12192	0.14048	0.14752	0.3264	0.13376	0.10272	0.21472	0.20544	0.13632	0.3648	0.128	0.1664	0.08896	0.09024	0.1744	0.28576	0.26432	0.2176	0.1776	0.11008	0.30496	0.13952
CarnitineC6-2OH	FA	CAR	289.152539	[M+H]+	C13H23NO6	2.4064	2.4896	2.4128	2.3904	3.84	2.528	2.7616	2.8064	2.4608	6.144	3.1008	2.6112	4.544	4.8	3.264	3.968	3.488	3.488	2.5952	3.0208	3.488	3.328	4.96	3.184	3.616	2.3904	2.8448	3.1168
CarnitineC12-OH	FA	CAR	359.267174	[M+H]+	C19H37NO5	0.3776	0.3776	0.4032	0.3808	0.4544	0.4576	0.4384	0.4544	0.5824	1.12	0.4544	0.464	0.7392	0.8288	0.432	0.8064	0.4288	0.5632	0.4576	0.6144	0.4608	0.4128	0.7232	0.4448	0.4608	0.5056	0.4416	0.48
CarnitineC12:1-2OH	FA	CAR	373.246439	[M+H]+	C19H35NO6	3.584	3.488	3.648	3.648	4.32	4.832	3.936	4.224	3.424	9.28	4.128	4.064	8.224	9.152	4.608	7.456	4.96	5.024	3.776	4.352	4.064	4.576	6.912	4.64	5.024	4.416	3.776	4.736
CarnitineC16:0	FA	CAR	399.334859	[M+H]+	C23H45NO4	0.2224	0.25472	0.23776	0.23296	0.1952	0.624	0.16864	0.15136	0.21472	0.3424	0.3232	0.08832	0.336	0.08576	0.3456	0.32	0.1088	0.27072	0.5344	0.416	0.13312	0.06656	0.15328	0.19616	0.19904	0.27264	0.384	0.13152
CarnitineC18:0	FA	CAR	427.366159	[M+H]+	C25H49NO4	0.22528	0.25984	0.2784	0.27392	0.27584	0.5824	0.15392	0.14976	0.18048	0.24032	0.20416	0.06112	0.25984	0.10208	0.1728	0.2608	0.18976	0.4512	0.528	0.6592	0.21088	0.12544	0.18208	0.25952	0.25824	0.27776	0.352	0.25632
CarnitineC3:1-2OH	FA	CAR	247.105589	[M+H]+	C10H17NO6	0.08576	0.07936	0.07392	0.08384	0.12704	0.09056	0.09664	0.13376	0.08512	0.31744	0.12704	0.12032	0.16512	0.1664	0.11648	0.19264	0.11872	0.13024	0.10752	0.12064	0.1136	0.0992	0.2272	0.1248	0.1232	0.09472	0.1024	0.112
CarnitineC5:1	FA	CAR	243.147059	[M+H]+	C12H21NO4	0.0816	0.07328	0.06624	0.07872	0.14016	0.1104	0.16096	0.12128	0.23232	0.7264	0.18688	0.1184	0.3392	0.416	0.19008	0.28352	0.15776	0.15968	0.11712	0.14688	0.104	0.23232	0.4032	0.09568	0.08512	0.2048	0.112	0.14816
CarnitineC5:1-2OH	FA	CAR	273.121239	[M+H]+	C12H19NO6	90.88	100.16	95.04	103.36	127.04	116.8	117.76	124.8	98.24	348.8	117.76	119.04	214.4	242.24	127.68	186.24	128.96	127.68	120.32	126.4	131.2	122.88	209.6	115.52	126.72	112.64	126.08	120.32
CarnitineC12:1	FA	CAR	341.256609	[M+H]+	C19H35NO4	0.15232	0.22208	0.15488	0.19808	0.168	0.21504	0.2304	0.28128	0.152	1.168	0.2192	0.248	0.6272	0.8224	0.28224	0.464	0.31264	0.2528	0.24736	0.2224	0.24192	0.27008	0.5664	0.22816	0.30112	0.2528	0.2208	0.3104
Cholesterol	ST	Cholesterol	386.354865	[M-H2O+H]+	C27H46O	6760	7280	6880	6360	3980	6880	3844	3168	4040	1440	5600	6600	6960	988	4800	10560	9560	7320	8120	7240	7880	8240	7440	11320	6160	8600	6640	4840
SPH(d16:1)	SP	SPH	271.251129	[M+H]+	C16H33NO2	93.44	89.6	95.68	90.88	83.52	91.52	87.68	103.68	36.16	112.32	89.92	85.76	96.64	106.88	99.52	110.4	87.04	100.8	91.52	107.2	92.48	97.28	102.08	90.24	85.44	102.72	93.44	92.16
SPH(d18:1)	SP	SPH	299.282429	[M+H]+	C18H37NO2	1.1232	1.3088	1.1232	1.0912	2.0544	0.96	0.7744	1.024	1.3024	1.0624	1.5552	1.088	2.5024	0.8096	1.8784	2.176	0.8416	0.6048	0.8064	2.3712	0.9984	0.9536	1.9392	0.9888	0.7264	0.7744	0.624	0.464
Cer(d18:0/24:0)	SP	Cer	651.652944	[M+H]+	C42H85NO3	0.6616	0.3048	1.632	0.3352	0.5688	1.216	0.3656	0.4376	1.264	0.856	0.3408	1.992	0.4472	0.3832	2.816	1.224	0.396	0.6568	1.768	0.272	0.468	0.2896	1.328	1.208	0.4192	0.6648	1.288	0.3256
Cer(d18:1/14:0)	SP	Cer	509.480794	[M+H]+	C32H63NO3	20.32	14.16	8.32	10.56	6.576	8.16	5.872	0.7984	3.256	1.008	2.528	2.048	1.816	0.6936	1.064	3.464	29.04	20.8	4.912	6.688	24.4	16.4	14.72	30.96	16.96	31.84	9.68	9.28
Cer(d18:1/17:0)	SP	Cer	551.527744	[M+H]+	C35H69NO3	3.192	3.824	2.688	2.6	2.192	1.392	1.592	0.18	1.048	0.4712	1.296	1.504	0.2944	0.376	0.632	2	8.56	0.84	1.952	1.576	6.872	4.44	8.16	3.856	3.64	3.976	0.872	3.816
Cer(d18:1/18:0)	SP	Cer	565.543394	[M+H]+	C36H71NO3	2.904	2.584	3.872	1.96	1.384	2.336	0.4904	0.524	0.856	2.04	1.72	2.4	0.864	0.3424	0.992	1.216	4.872	3.296	4.872	2.008	3.208	3.512	15.68	4.136	1.352	4.24	4.152	3.608
Cer(d18:1/20:0)	SP	Cer	593.574694	[M+H]+	C38H75NO3	1.176	1.576	4.12	1.088	1.592	0.748	0.444	0.3656	0.7296	0.5488	0.3808	1.704	0.4856	0.3632	0.7408	1.608	1.656	1.448	2.592	1.424	3.232	2.128	8.56	1.432	2.632	2.976	1.896	1.816
Cer(d18:1/22:0)	SP	Cer	621.605994	[M+H]+	C40H79NO3	2.728	6.72	3.88	4.664	5.24	4.224	1.96	2.312	6.416	3.088	5.488	6.456	3.504	0.912	3.12	9.6	6.904	6.248	3.248	4.984	10.88	7.2	33.44	4.216	5.88	14.96	7.832	7.224
Cer(d18:1/26:0)	SP	Cer	677.668594	[M+H]+	C44H87NO3	0.3528	0.348	1.48	0.96	0.4112	1.576	1.264	0.776	3.192	1.016	0.5848	3.512	0.3072	0.3688	4.192	0.2248	0.824	1.504	1.72	2.056	1.248	0.7576	1.016	3.544	0.832	2.52	1.912	1.144
Cer(d18:1/16:1)	SP	Cer	535.496444	[M+H]+	C34H65NO3	91.2	81.6	70.16	80.8	47.36	27.28	86.4	16.16	58.48	79.04	26.08	36.64	33.12	42.16	34.64	33.84	172.8	56.96	39.92	48.8	141.6	148.8	296.8	106.4	153.6	74.32	64.64	59.76
CoenzymeQ10	PR	CoQ	862.68391	[M+H]+	C59H90O4	3.488	3.36	3.328	4.576	3.616	7.168	2.544	3.68	2.1888	0.7936	4.768	6.144	5.312	0.9536	4	8.768	3.712	3.168	6.144	4.64	4.8	5.472	7.776	4.8	1.648	2.752	3.008	1.8656
DG(14:0_16:0)	GL	DG	540.475375	[M+NH4]+	C33H64O5	60.16	83.2	80	104.64	109.76	273.28	144	62.4	79.36	40.64	129.6	74.56	36.16	177.6	45.12	189.12	48.96	82.88	56.64	133.76	166.4	96.64	182.72	66.88	82.88	87.36	44.16	73.6
DG(16:0_16:0)	GL	DG	568.506675	[M+NH4]+	C35H68O5	6448	4960	16960	12208	5616	24960	10208	5056	14288	7568	8896	7328	4304	12480	3568	9376	12880	4816	8464	9760	20320	13392	15728	7792	6528	9728	5168	8736
DG(14:0_18:0)	GL	DG	568.506675	[M+NH4]+	C35H68O5	73.6	94.4	226.56	168.64	96.96	358.4	184.64	62.08	177.28	86.72	117.76	98.88	61.12	104.32	47.04	86.4	97.92	50.56	90.88	166.08	253.76	155.52	186.24	137.28	99.52	176.64	63.04	70.4
DG(12:0_20:0)	GL	DG	568.506675	[M+NH4]+	C35H68O5	178.24	120.32	339.2	162.88	192	444.8	275.52	109.12	302.08	142.4	155.84	153.6	125.12	336	36.16	236.8	198.08	118.4	192.64	149.44	435.2	193.6	317.44	178.88	238.72	212.48	101.44	101.12
DG(17:0_16:0)	GL	DG	582.522325	[M+NH4]+	C36H70O5	56	49.92	139.2	90.88	82.88	161.28	96.96	38.08	112	85.12	100.16	53.44	34.88	97.6	46.4	122.56	45.12	43.84	65.92	89.92	126.08	105.6	188.48	72.32	66.24	43.84	35.2	68.48
DG(15:0_18:0)	GL	DG	582.522325	[M+NH4]+	C36H70O5	13.28	12	25.984	30.016	15.296	35.84	52.8	9.504	18.496	20.256	20.416	15.136	9.728	32.64	7.712	30.4	12.096	4.448	11.84	25.824	40.96	30.016	20.608	19.264	16.576	15.872	8.576	15.904
DG(16:0_18:0)	GL	DG	596.537975	[M+NH4]+	C37H72O5	28416	26496	40000	54720	24800	65600	37440	32320	39040	15456	25568	23168	5408	45440	20480	44800	29248	16096	16320	19648	62720	28352	48000	27520	24768	20512	16096	14304
DG(14:0_20:0)	GL	DG	596.537975	[M+NH4]+	C37H72O5	155.52	180.48	296	289.92	162.24	588.8	419.2	289.92	256.96	219.52	248.96	129.28	106.56	576	147.2	486.4	232	107.84	213.12	266.24	752	294.4	352	157.12	156.16	272.32	139.84	92.16
DG(17:0_18:0)	GL	DG	610.553625	[M+NH4]+	C38H74O5	106.56	54.4	93.44	139.84	80.64	448	451.2	63.04	160.32	162.88	111.36	182.4	47.36	291.52	79.36	309.12	163.52	157.44	110.08	329.6	336	171.2	374.4	49.28	154.24	195.84	29.28	67.84
DG(18:0_18:0)	GL	DG	624.569275	[M+NH4]+	C39H76O5	23680	25760	44960	31040	16160	72800	35040	16320	16640	25760	15680	15584	9488	40160	10912	35520	8560	10304	29920	26240	14784	18400	28960	17760	50400	32320	18720	37440
DG(14:0_22:0)	GL	DG	624.569275	[M+NH4]+	C39H76O5	326.4	296.64	311.68	742.4	448	1737.6	393.6	269.12	390.4	444.8	377.6	172.48	112	668.8	145.92	800	133.76	82.24	259.84	178.56	182.4	659.2	183.04	342.4	688	486.4	152.96	146.24
DG(19:0_18:0)	GL	DG	638.584925	[M+NH4]+	C40H78O5	50.88	52.16	188.48	115.2	50.88	145.92	98.56	42.88	69.44	108.16	72.32	31.52	55.36	95.68	24.64	97.6	33.92	73.92	57.28	65.28	184	36.48	126.4	69.76	105.28	61.12	49.92	62.72
DG(20:0_18:0)	GL	DG	652.600575	[M+NH4]+	C41H80O5	280.96	441.6	617.6	460.8	470.4	176	915.2	214.4	601.6	318.08	425.6	316.48	189.76	704	288.32	694.4	390.4	234.24	374.4	393.6	393.6	620.8	1302.4	186.24	358.4	784	183.68	309.44
DG(18:0_22:0)	GL	DG	680.631875	[M+NH4]+	C43H84O5	61.76	70.72	222.72	56.64	62.4	195.2	245.44	56	93.12	74.56	70.08	48.64	35.84	117.44	54.72	89.28	151.36	67.2	63.04	128.32	94.72	153.92	147.84	93.76	75.52	89.6	32.64	59.52
DG(14:0_16:1)	GL	DG	538.459725	[M+NH4]+	C33H62O5	1107.2	915.2	2528	1584	912	4192	2553.6	1001.6	1926.4	1280	1369.6	1049.6	1004.8	3552	595.2	2051.2	1462.4	873.6	1164.8	1529.6	2806.4	1817.6	2252.8	1056	1027.2	1299.2	560	1180.8
DG(16:0_16:1)	GL	DG	566.491025	[M+NH4]+	C35H66O5	111.04	146.56	317.12	149.76	150.72	454.4	355.2	122.24	209.28	191.36	266.88	80.32	112.64	387.2	87.04	210.24	172.16	76.16	130.88	136.96	299.2	215.68	377.6	115.2	148.16	126.72	60.48	137.28
DG(16:1_16:1)	GL	DG	564.475375	[M+NH4]+	C35H64O5	102.08	68	238.4	118.88	111.68	350.4	225.6	65.44	188.8	200	48.16	102.72	55.2	291.2	84.48	187.2	177.6	65.44	77.28	166.4	270.4	155.36	307.2	117.28	143.84	99.36	45.44	74.72
DG(18:1_18:2)	GL	DG	618.522325	[M+NH4]+	C39H70O5	30.4	24.736	64.32	40.32	21.248	41.92	51.84	18.624	90.24	77.12	37.44	23.04	33.92	72.96	21.568	80	37.12	8.992	22.944	38.72	77.44	28.224	72.64	26.784	25.76	20.64	19.648	20.48
DG(18:2_18:2)	GL	DG	616.506675	[M+NH4]+	C39H68O5	19.36	12.896	59.52	23.52	24.64	70.08	58.4	13.152	36	25.92	20.48	10.32	10.928	52.8	12.896	62.56	33.76	14.064	24.48	34.72	56.16	34.24	60	12.88	24.48	12.768	12.192	19.36
DG(18:0_20:4)	GL	DG	644.537975	[M+NH4]+	C41H72O5	518.4	257.92	905.6	620.8	435.2	1728	464	222.08	270.4	39.04	867.2	406.4	254.72	30.56	231.04	1532.8	320	441.6	864	441.6	460.8	172.48	860.8	266.88	524.8	480	215.68	282.88
MG(14:0)	GL	MG	302.24571	[M+NH4]+	C17H34O4	178	144.4	147.6	108	149.6	143.6	146	140	162.8	198.8	148	140	146.4	169.2	146	178.4	157.6	127.6	172.8	159.2	130.4	166.8	158.4	182.8	112.8	164	158.8	145.6
MG(16:0)	GL	MG	330.27701	[M+NH4]+	C19H38O4	16120	15840	17160	15480	15560	15600	15640	16240	18200	20320	15880	16840	17040	19600	14760	20240	14560	15280	18000	16480	15240	14760	16840	17400	17320	16280	17160	15800
MG(17:0)	GL	MG	344.29266	[M+NH4]+	C20H40O4	90.4	84.8	77.2	65.2	69.2	92.4	100.4	103.2	83.6	89.6	86.4	102	68.4	92.8	88.8	107.2	84.8	81.6	99.2	93.2	81.6	92.8	83.2	90.4	79.6	99.6	81.2	77.6
MG(18:0)	GL	MG	358.30831	[M+NH4]+	C21H42O4	19960	19280	23120	20360	18320	20400	20000	24880	22440	21480	20440	21600	22400	24720	19480	25480	20040	20160	25160	22320	18760	22760	20640	24760	22400	21080	22600	19840
MG(20:0)	GL	MG	386.33961	[M+NH4]+	C23H46O4	200.4	65.6	99.2	152.8	114	76.4	230	154.4	176.4	209.2	154	168.4	165.6	163.6	227.6	134	113.2	117.2	142	97.2	97.2	91.6	111.6	188	102	156.8	199.2	139.6
HexCer(d16:1/18:0)	SP	HexCer	699.564919	[M+H]+	C40H77NO8	24.736	39.04	70.4	32.64	32.96	30.848	44.48	16.896	33.92	15.072	65.28	30.016	75.52	18.752	16.544	22.56	38.08	35.84	25.792	55.36	24.64	36.48	25.28	28.352	40.32	21.728	15.968	17.952
HexCer(d18:1/16:0)	SP	HexCer	699.564919	[M+H]+	C40H77NO8	38.72	13.792	33.6	22.144	13.152	18.656	20.416	5.12	19.872	1.1456	46.08	22.336	64.96	2.3456	38.08	43.52	54.08	45.76	33.28	37.76	18.112	20.928	90.88	27.904	21.728	23.904	32.64	12.832
HexCer(d18:1/18:0)	SP	HexCer	727.596219	[M+H]+	C42H81NO8	2.2176	1.3248	5.184	1.0432	1.1968	5.568	1.3376	0.7104	1.8848	0.4448	3.648	6.496	0.4288	0.368	0.8864	2.3424	2.2336	3.424	3.968	4.032	3.616	5.984	10.432	1.9936	2.6976	2.2176	2.8736	1.1296
HexCer(d18:1/16:1)	SP	HexCer	697.549269	[M+H]+	C40H75NO8	352	361.6	454.4	277.12	262.4	380.8	211.2	190.4	553.6	81.28	524.8	339.2	304.32	105.92	329.6	253.76	269.44	460.8	342.4	444.8	311.68	441.6	582.4	633.6	291.84	211.2	234.24	146.56
HexCer(d18:1/24:1)	SP	HexCer	809.674469	[M+H]+	C48H91NO8	7.072	7.936	11.776	6.656	4.064	7.072	2.832	1.3376	4.896	1.008	7.296	8.736	6.816	0.6656	4.864	4.704	8.8	7.584	11.2	9.408	6.272	13.536	91.84	21.92	5.184	2.96	3.936	2.3168
SHexCer(d18:1:/16:0)	SP	HexCer	779.521734	[M+H]+	C40H77NO11S	2.2816	2.6016	4.32	2.4736	0.9376	2.544	0.9088	0.5536	1.6448	0.48	0.8768	3.296	2.032	0.20928	1.0272	1.888	1.568	2.9568	2.8256	7.232	2.3392	4.704	20.832	9.12	1.6512	1.9584	1.7344	0.8512
LPC(0:0/15:0)	GP	LPC	481.316841	[M+H]+	C23H48NO7P	127.2	168	141.92	140.32	112	171.2	129.12	130.72	106.24	138.88	141.76	137.6	135.2	148.64	122.88	140.48	139.68	143.36	132	126.24	151.68	135.36	115.2	138.08	129.92	133.92	141.44	148.48
LPC(15:0/0:0)	GP	LPC	481.316841	[M+H]+	C23H48NO7P	122.24	161.6	135.52	147.04	120.64	144.16	128.96	139.2	104.96	144.96	143.52	140.64	141.76	149.76	130.24	122.72	139.2	154.72	128.96	126.56	145.12	138.4	129.44	132.64	124.48	137.6	133.6	140.96
LPC(0:0/17:0)	GP	LPC	509.348141	[M+H]+	C25H52NO7P	1.872	1.648	1.84	1.696	1.5568	1.5232	1.5216	1.24	1.3776	1.5088	1.808	1.4256	1.4304	1.248	1.76	1.936	2.032	1.808	1.968	2.56	2.32	2.336	2.976	1.872	1.5728	1.856	3.168	1.808
LPC(17:0/0:0)	GP	LPC	509.348141	[M+H]+	C25H52NO7P	2.208	1.952	1.5312	1.744	1.2928	1.5136	1.4064	1.3856	1.2784	1.504	1.728	1.5008	1.632	1.0928	1.512	2.208	2.128	1.952	1.92	2.848	2.4	2.512	3.152	1.696	1.872	1.984	2.976	1.648
LPC(16:1)	GP	LPC	493.316841	[M+H]+	C24H48NO7P	14.832	15.296	14.16	15.568	7.872	14.24	11.424	7.344	9.392	17.28	8.032	14.272	10.496	8.768	7.248	11.088	14.56	12.288	17.6	22.08	9.744	18.24	45.28	9.776	10.848	14.08	17.12	17.12
LPC(0:0/18:1)	GP	LPC	521.348141	[M+H]+	C26H52NO7P	0.1872	0.1904	0.2352	0.192	0.07568	0.208	0.2352	0.10288	0.11456	0.08672	0.1352	0.1152	0.2704	0.0752	0.09312	0.3088	0.2192	0.224	0.3312	0.2992	0.176	0.2688	0.352	0.2064	0.13824	0.2896	0.2224	0.4096
LPC(18:1/0:0)	GP	LPC	521.348141	[M+H]+	C26H52NO7P	0.1872	0.2336	0.24	0.2176	0.09376	0.1744	0.2624	0.11376	0.08096	0.10832	0.12032	0.13712	0.2992	0.07392	0.10464	0.2576	0.1856	0.232	0.3936	0.3808	0.2176	0.232	0.3392	0.2544	0.1952	0.2768	0.1968	0.416
LPC(0:0/20:1)	GP	LPC	549.379441	[M+H]+	C28H56NO7P	1.232	1.0544	1.1392	0.9936	0.12512	0.2928	0.3616	0.11856	0.10864	0.0224	0.2704	0.352	0.5232	0.03728	0.312	0.456	2.176	0.6576	2.784	2.256	1.664	2.464	2.464	1.5632	1.1616	0.9152	1.632	3.056
LPC(0:0/18:2)	GP	LPC	519.332491	[M+H]+	C26H50NO7P	0.0656	0.0472	0.08816	0.05376	0.02464	0.04912	0.06464	0.03824	0.05536	0.2992	0.05632	0.04576	0.14736	0.02448	0.068	0.2256	0.036	0.0432	0.06064	0.13616	0.03088	0.03504	0.10336	0.04624	0.08096	0.0736	0.05088	0.09664
LPC(0:0/22:4)	GP	LPC	571.363791	[M+H]+	C30H54NO7P	1.0704	1.0224	1.1136	0.9456	0.3664	1.2592	1.4016	0.3664	0.4688	0.2096	0.3712	0.3808	1.4096	0.10208	0.6944	1.0608	1.2656	2.016	2.128	2.624	0.9232	1.424	1.4368	1.3376	0.9984	1.808	0.9216	1.632
LPC(22:5/0:0)	GP	LPC	569.348141	[M+H]+	C30H52NO7P	1.1184	0.992	1.2464	1.096	0.5328	1.1216	0.792	0.496	0.5168	0.11168	0.3232	0.264	0.9904	0.0608	0.3088	0.4464	1.136	1.0704	2.688	3.136	0.9232	1.0144	1.2096	0.952	0.8784	1.3136	1.04	1.92
LPC(22:6)	GP	LPC	567.332491	[M+H]+	C30H50NO7P	1.4384	1.3744	1.5376	1.3712	0.4352	0.768	0.7952	0.6384	0.4112	1.552	0.4464	0.6656	1.76	0.2288	0.856	1.4496	1.4864	1.92	3.36	4.544	1.3824	1.5008	4.784	1.5248	1.1936	1.616	2.128	2.704
LPC(O-16:0)	GP	LPC-O	481.353226	[M+H]+	C24H52NO6P	17.28	16	16.16	15.712	7.12	11.744	2.784	1.968	4.096	0.3552	11.088	7.84	6.704	0.1904	10.096	10.016	18.88	23.36	26.08	32.32	26.4	19.2	24.8	41.44	9.168	24.16	30.4	7.392
LPC(O-18:0)	GP	LPC-O	509.384526	[M+H]+	C26H56NO6P	4.928	5.616	4.8	5.44	1.696	2.464	0.6368	0.68	0.9936	0.12256	1.952	2.272	1.4384	0.0536	5.904	3.296	11.024	5.696	6.832	11.168	8.944	9.584	10.096	13.328	3.488	10.048	10.976	3.072
LPC(O-20:3)	GP	LPC-O	531.368876	[M+H]+	C28H54NO6P	7.984	6.768	7.536	6.832	7.488	8	8.768	7.584	6.784	7.856	7.792	8.16	7.872	7.872	8.016	8.112	7.584	7.456	7.36	7.12	7.328	8.16	8.768	7.84	7.536	6.8	9.424	7.232
LPE(0:0/16:0)	GP	LPE	453.285541	[M+H]+	C21H44NO7P	1.824	2.464	2.816	2.576	2.48	3.04	2.528	2.208	2.4	15.84	2.432	2.896	3.344	1.3312	2.56	4.96	2.496	2.4	2.512	13.232	2.096	1.696	3.072	2.784	2.336	2.144	1.76	2.256
LPE(16:0/0:0)	GP	LPE	453.285541	[M+H]+	C21H44NO7P	2.8	2.448	2.048	2.256	2.08	3.344	2.08	2.08	1.776	15.616	2.752	2.272	3.328	2.016	2.112	3.28	1.4656	2.768	3.392	11.152	1.84	1.4256	2.832	2.704	1.824	1.5568	2.928	1.888
LPE(0:0/18:0)	GP	LPE	481.316841	[M+H]+	C23H48NO7P	7.568	6.624	8.72	6.672	6.688	15.984	4.784	4.416	4.272	8.08	14.512	17.6	9.296	1.0608	5.536	27.04	5.088	7.072	8.224	17.6	3.408	4.048	8.768	7.744	4.496	2.368	7.168	3.856
LPE(18:0/0:0)	GP	LPE	481.316841	[M+H]+	C23H48NO7P	7.152	6.432	8.992	6.544	6.992	16.32	4.448	3.936	4.576	8.272	13.728	17.12	10.544	0.7136	5.008	27.36	5.776	7.648	8.288	16.32	3.104	4.592	8.416	7.488	4.624	2.624	7.12	4.432
LPE(0:0/18:1)	GP	LPE	479.301191	[M+H]+	C23H46NO7P	8.8	8.16	10.144	8.32	10.336	14.544	10.224	8.544	8.176	8.352	11.792	9.6	16.96	7.104	9.6	16.16	8.304	8.288	9.328	8.272	7.344	6.592	7.424	8.752	7.808	9.056	8.496	7.088
LPE(0:0/18:2)	GP	LPE	477.285541	[M+H]+	C23H44NO7P	3.152	2.656	3.168	2.512	2.736	3.312	3.056	3.056	2.544	13.328	3.888	3.152	9.424	1.2976	3.856	10.528	1.84	1.984	2.672	5.248	2.32	1.088	3.264	2.32	2.224	1.5296	3.008	1.792
LPE(22:3)	GP	LPE	531.332491	[M+H]+	C27H50NO7P	3.856	2.736	4.992	3.36	2.976	6.096	5.328	3.536	3.984	0.6752	4.864	3.248	18.4	0.64	6.08	15.952	1.728	1.904	1.2512	1.048	2.144	0.8192	1.0752	2.384	2.352	1.2592	2.72	1.904
LPE(20:4)	GP	LPE	501.285541	[M+H]+	C25H44NO7P	3.92	3.232	4.912	3.472	4.752	18.72	4.992	3.92	2.896	7.536	6.992	7.632	11.376	0.7232	3.264	15.904	2.608	3.776	3.68	4.56	2.08	1.4304	3.856	3.744	2.144	2.992	2.8	2.032
LPE(22:4)	GP	LPE	529.316841	[M+H]+	C27H48NO7P	4.352	4.656	5.728	4.288	6.88	9.52	4.928	5.952	3.872	1.776	6.24	5.36	16.64	1.5312	8.464	23.52	2.08	4.032	2.992	3.552	1.576	1.12	2.976	3.536	2.416	1.3984	2.944	2.496
LPE(22:5/0:0)	GP	LPE	527.301191	[M+H]+	C27H46NO7P	1.0384	1.4624	1.648	1.728	3.728	4.496	1.632	2.512	2.144	1.696	2.544	2.432	4.16	0.4576	1.464	6.16	1.1264	1.016	2.544	1.5008	1.3536	0.6416	2.288	1.448	1.1104	0.7728	1.3136	1.1984
LPE(22:6)	GP	LPE	525.285541	[M+H]+	C27H44NO7P	3.328	2.624	3.488	2.784	4.784	3.904	1.6	3.2	2.32	9.76	3.088	3.68	10.544	0.7856	4.624	10.672	1.872	3.024	3.552	4.88	1.824	1.0608	3.504	3.488	1.4208	1.888	2.336	2.208
LPE(P-16:0)	GP	LPE-P	437.290626	[M+H]+	C21H44NO6P	15.488	13.968	18.24	16.16	18.24	40	10.656	7.264	9.104	0.7696	29.44	22.4	20.16	0.5728	9.744	47.2	14.144	8.576	12.736	16.8	6.8	5.488	19.2	29.76	6.704	3.856	14.816	10.576
PC(14:0_14:0)	GP	PC	677.499556	[M+H]+	C36H72NO8P	6.02	5.52	5.88	7.62	5.2	11.32	3.86	2.9	4.04	1.59	8.5	7.8	4	1.586	3.64	10.3	11.06	10.48	6.86	7.54	12.34	9.38	8.14	6.66	6.8	8.86	5.78	3
PC(15:0_16:1)	GP	PC	717.530856	[M+H]+	C39H76NO8P	41.12	40.56	38.88	55.52	21.04	58.96	9.92	5.864	23.36	2.424	60.56	123.2	25.28	1.376	16.08	68.32	42.72	52.88	40.08	63.52	108	82.4	76.32	49.44	54.32	66	39.76	31.84
PC(16:0_16:1)	GP	PC	731.546506	[M+H]+	C40H78NO8P	11.2	7.2	9.92	12.4	10.4	21.2	5.752	6.248	5.28	1.256	12.72	18.32	11.36	0.6168	10.56	16.96	8.88	17.6	11.44	11.6	13.04	10.32	10.24	9.68	9.2	15.2	8.08	5.744
PC(16:0_18:1)	GP	PC	759.577806	[M+H]+	C42H82NO8P	31.52	23.76	34.48	34.48	36.8	74.88	30.4	22.24	22.72	2.832	55.68	26.16	42.8	4.224	37.28	62.8	22.96	52.48	33.44	26.56	25.2	20.32	13.6	28	21.12	39.28	21.76	21.28
PC(14:0_18:2)	GP	PC	729.530856	[M+H]+	C40H76NO8P	68.56	73.2	68.4	96	63.04	145.6	71.92	49.92	96.8	17.12	168	175.2	184.8	10.64	120	346.4	54.24	65.92	44.96	59.76	84.8	47.84	70.48	29.04	81.6	86.4	49.28	34.72
PC(16:0_18:2)	GP	PC	757.562156	[M+H]+	C42H80NO8P	18.96	18.8	19.12	17.68	10.16	26.56	16.56	13.52	16.56	4.624	32.96	23.76	46.88	1.928	34.88	64.24	10.8	26.88	10.24	15.92	12.64	8.24	11.2	10.96	28.88	21.76	16.4	9.52
PC(17:1_18:1)	GP	PC	771.577806	[M+H]+	C43H82NO8P	85.6	69.28	83.2	103.2	52.08	104	65.76	45.28	63.44	15.36	153.6	144	156.8	9.92	78.4	274.4	58.16	99.2	52.64	56.32	102.4	76.64	63.6	68.56	89.6	70.96	56.16	73.6
PC(14:0_18:3)	GP	PC	727.515206	[M+H]+	C40H74NO8P	30	35.04	33.44	43.84	42.96	29.2	25.92	37.36	24.8	6.32	51.76	65.52	47.92	3.424	72.4	93.6	61.52	47.52	35.92	41.84	47.92	24.96	33.92	34.24	20.8	30	20.64	19.68
PC(14:0_20:4)	GP	PC	753.530856	[M+H]+	C42H76NO8P	69.12	68.48	68.96	96.8	89.6	192.8	71.6	62.64	68.64	9.6	165.6	179.2	133.6	2.992	53.12	236.8	46.32	80.8	50.16	75.84	65.04	39.28	57.44	30.8	53.04	60.48	44.48	31.12
PC(16:0_20:4)	GP	PC	781.562156	[M+H]+	C44H80NO8P	28.96	22.88	28.72	33.44	33.6	72.56	20.4	20	15.44	2.688	47.36	31.2	30.96	1.656	27.92	42.48	21.28	66.64	39.2	36.16	26.32	14	17.12	21.84	27.84	34.64	28	15.76
PC(18:0_22:4)	GP	PC	837.624756	[M+H]+	C48H88NO8P	12.72	9.36	17.28	19.28	27.68	10.56	14.72	19.12	15.6	2.832	31.76	14.8	33.44	1.888	16.24	32.8	8.24	20.16	21.84	22.88	9.52	6.352	4.504	10.48	7.336	8.32	6.536	10.4
PC(14:0_20:5)	GP	PC	751.515206	[M+H]+	C42H74NO8P	5.256	5.656	7.248	9.2	6.76	9.84	6.32	6.264	7.8	1.664	15.6	21.04	21.68	1.728	17.36	36.16	3.64	4.312	2.488	3.8	4.784	2.056	4.48	1.264	4.288	2.856	1.512	2.736
PC(16:0_20:5)	GP	PC	779.546506	[M+H]+	C44H78NO8P	172.8	165.6	164.8	239.2	204	427.2	147.2	169.6	187.2	24.96	327.2	360.8	323.2	16.16	213.6	521.6	94.4	287.2	190.4	226.4	126.4	78.16	156.8	68.32	116	172	95.2	96
PC(17:1_20:4)	GP	PC	793.562156	[M+H]+	C45H80NO8P	27.6	24.72	26	30.64	20.32	62.8	11.2	19.44	17.36	1.832	55.68	64.8	31.44	2.312	20	58.48	12.64	40.4	22.56	44.32	27.2	19.12	36.88	11.84	28.64	30.64	22	22.16
PC(16:0_22:5)	GP	PC	807.577806	[M+H]+	C46H82NO8P	9.76	8.08	10.08	11.36	10.16	19.28	8.32	12.24	7.168	0.76	20.16	15.92	18	0.5464	12.64	32.56	3.528	19.44	10.56	11.6	4.328	2.648	2.2	3.856	9.44	7.648	6.32	5.56
PC(18:0_22:5)	GP	PC	835.609106	[M+H]+	C48H86NO8P	124	88.8	127.2	146.4	160.8	311.2	104	161.6	92	10.32	208	144.8	222.4	10.64	136	304.8	61.6	198.4	138.4	111.2	92	46	35.52	67.92	63.84	76.08	50.24	92.8
PC(15:1_22:5)	GP	PC	791.546506	[M+H]+	C45H78NO8P	12.16	11.92	10.64	16.8	7.544	7.024	6.736	11.2	8.4	1.728	12.64	21.2	17.2	1.52	12	50	8.16	27.04	18.56	30	24.72	15.28	13.92	15.52	14.72	13.2	13.84	11.92
PC(16:0_22:6)	GP	PC	805.562156	[M+H]+	C46H80NO8P	2.616	2.448	2.384	3.216	3.824	3.96	1.784	2.8	2.008	0.8	3.064	2.368	4.144	0.3552	4.664	7.016	1.544	10.64	4.576	4.84	2.872	1.512	1.16	2.384	2.28	2.896	2.608	1.44
PC(18:0_22:6)	GP	PC	833.593456	[M+H]+	C48H84NO8P	152	112.8	158.4	190.4	224	112.8	99.2	200.8	112	11.84	200	138.4	223.2	20.4	268	541.6	84.8	380.8	225.6	189.6	125.6	70	42.64	111.2	92.8	118.4	80	126.4
PC(18:1_22:6)	GP	PC	831.577806	[M+H]+	C48H82NO8P	100	89.6	101.6	135.2	125.6	174.4	75.68	204	229.6	12.64	204.8	127.2	232.8	12.4	121.6	595.2	41.04	139.2	97.6	117.6	59.04	28.08	52.96	39.52	95.2	66.56	47.68	72.8
PC(20:1_22:6)	GP	PC	859.609106	[M+H]+	C50H86NO8P	13.36	13.2	11.04	15.12	9.92	20.16	10.8	16.16	11.36	2.608	17.84	12.88	34.56	1.68	18.48	54.4	7.856	18.72	12.64	19.36	7.896	5.944	8.08	8.72	11.92	7.88	6.008	10.16
PC(20:4_20:4)	GP	PC	829.562156	[M+H]+	C48H80NO8P	21	19.46	21	30.8	15.6	38.4	15.26	28.6	19.26	3.32	28.8	27	42.4	2.52	23.6	77.2	13.56	32	34.2	42.6	20.8	11.64	27.2	12.68	31.2	18.28	18.72	21.8
PC(20:2_22:6)	GP	PC	857.593456	[M+H]+	C50H84NO8P	64.8	51.52	61.92	89.6	51.04	193.6	38.56	88.8	37.04	4.968	107.2	92	105.6	2.632	33.2	158.4	49.36	100.8	123.2	138.4	66.72	39.6	65.36	58.32	54.08	56.56	41.76	56.4
PC(O-16:0_16:1)	GP	PC-O	717.567241	[M+H]+	C40H80NO7P	29.28	25.44	27.84	32.64	8.688	19.04	16.64	10.032	19.2	3.808	30.24	36	29.28	2.016	14.656	74.08	57.44	21.12	20.8	18.4	52.8	59.04	45.44	40	29.12	29.92	17.28	19.52
PC(O-18:1_18:2)	GP	PC-O	769.598541	[M+H]+	C44H84NO7P	16.48	11.92	17.28	20.16	16	36.32	6.992	5.168	7.424	0.9712	19.04	14.368	15.584	0.6304	24	19.52	13.776	29.12	24.48	22.88	21.12	20.16	15.264	24.32	11.856	18.24	13.072	13.296
PC(O-14:0_20:4)	GP	PC-O	739.551591	[M+H]+	C42H78NO7P	105.92	77.12	94.72	118.24	74.4	116	75.04	95.68	98.4	76.8	128	90.08	88.64	87.36	113.76	97.12	107.68	117.76	103.04	124.96	106.24	111.04	97.44	99.2	107.04	96.16	94.4	85.92
PC(O-16:0_20:4)	GP	PC-O	767.582891	[M+H]+	C44H82NO7P	130.72	95.52	140.32	153.28	130.08	312	53.44	42.24	53.92	3.248	133.28	114.24	99.04	4.064	171.2	100.96	107.68	254.4	219.2	203.2	177.6	161.6	132.8	201.6	88	135.36	118.08	106.56
PC(O-18:0_20:4)	GP	PC-O	795.614191	[M+H]+	C46H86NO7P	25.6	18.24	27.52	32.64	39.52	59.68	12.944	12.576	19.2	1.0832	35.04	13.104	43.52	2.272	100.48	26.4	11.952	39.68	27.04	48.48	23.36	28.64	23.04	34.4	19.04	21.76	18.88	18.08
PC(O-20:0_22:4)	GP	PC-O	851.676791	[M+H]+	C50H94NO7P	0.8928	0.8176	0.9472	1.0992	0.7536	1.0176	1.1632	0.7136	0.9072	0.0832	1.28	0.7712	1.696	0.11296	1.312	2.464	0.7504	1.0016	0.616	1.984	1.4592	0.5328	0.4016	0.8576	0.8656	1.1872	0.4464	0.9808
PC(O-16:1_20:4)	GP	PC-O	765.567241	[M+H]+	C44H80NO7P	9.648	7.808	8.64	10.768	7.792	14.96	3.76	4.928	5.104	0.5936	9.36	9.936	7.904	0.6704	11.824	8.88	7.6	22.08	13.568	22.88	11.152	14.016	13.648	13.824	8.624	11.536	8.912	5.856
PC(O-18:1_20:4)	GP	PC-O	793.598541	[M+H]+	C46H84NO7P	33.12	22.4	36.32	39.68	33.12	54.72	13.664	19.68	16	4.112	39.36	28.96	28.16	13.52	62.56	40.32	33.92	59.04	52	33.76	37.92	36	34.08	43.04	23.2	31.68	20	36
PE(P-16:0_18:1)	GP	PE-P	701.535941	[M+H]+	C39H76NO7P	52.8	69.28	61.28	57.28	99.36	130.24	64.96	50.08	80.48	14.704	128	72.8	138.4	5.344	97.44	135.36	16.64	57.92	27.04	34.72	26.72	17.28	16.16	56.8	38.4	28.16	39.52	17.6
PE(P-18:0_18:1)	GP	PE-P	729.567241	[M+H]+	C41H80NO7P	5.76	10.64	8.208	7.792	8.976	11.888	8.048	5.408	6.08	4.288	9.664	6.96	16.32	0.6736	29.76	13.392	4.608	7.856	3.232	6.544	7.216	3.28	3.68	12.032	7.424	5.264	9.472	2.8
PE(P-16:0_18:2)	GP	PE-P	699.520291	[M+H]+	C39H74NO7P	29.28	49.44	36.16	37.76	20.48	43.84	49.12	28.8	58.24	23.04	72.64	38.4	159.04	4.192	79.52	147.84	12.4	24.16	8.736	8.688	16.16	6.976	10.096	18.72	39.04	16.8	23.2	14.56
PE(P-16:0_18:3)	GP	PE-P	697.504641	[M+H]+	C39H72NO7P	18.24	29.6	21.92	21.44	18.88	34.56	35.52	25.6	48.32	21.44	33.92	37.44	53.44	1.712	34.72	70.24	15.216	12.544	4.832	7.36	8.032	5.84	7.792	13.488	11.776	9.072	11.232	6.96
PE(P-18:0_20:3)	GP	PE-P	753.567241	[M+H]+	C43H80NO7P	1.3424	3.488	1.744	2.752	1.0896	1.984	3.568	1.448	2.304	1.872	1.68	1.5232	9.552	0.328	10.688	7.312	1.3776	1.616	0.4064	1.056	2.128	0.5616	1.0912	2.304	2.688	1.1168	2.736	1.1888
PE(P-16:0_20:4)	GP	PE-P	723.520291	[M+H]+	C41H74NO7P	179.2	299.2	171.2	172.8	219.2	828.8	203.2	136.96	174.4	41.44	348.8	289.6	371.2	9.696	160	456	91.04	209.6	120.32	150.88	94.08	60.48	108.8	169.6	144	140.8	254.4	76.96
PE(P-17:0_20:4)	GP	PE-P	737.535941	[M+H]+	C42H76NO7P	5.088	8.048	6.928	4.848	4.64	11.248	3.024	2.544	2.56	0.488	8.672	10.816	5.584	0.2224	4.432	9.92	3.728	6.208	2.72	7.024	6.096	4.56	7.136	7.888	7.024	4.864	7.424	3.84
PE(P-18:0_20:4)	GP	PE-P	751.551591	[M+H]+	C43H78NO7P	42.4	56.16	51.04	48.48	38.4	108.48	43.2	28.8	25.92	20.48	53.76	57.28	81.92	2.288	66.72	93.76	38.72	83.2	35.04	83.52	44.64	32.32	61.76	71.2	68.32	45.28	89.12	37.12
PE(P-18:0_22:4)	GP	PE-P	779.582891	[M+H]+	C45H82NO7P	14.816	24.16	19.36	18.56	15.904	20.48	14.72	14.416	14.752	7.536	11.712	11.856	46.56	2.928	94.24	40.8	8.016	18.56	9.776	23.52	15.264	9.456	20.32	19.04	19.52	13.488	28.32	9.888
PE(P-18:1_20:4)	GP	PE-P	749.535941	[M+H]+	C43H76NO7P	7.616	12.464	9.776	8.592	7.072	37.28	5.376	5.248	4.864	3.968	15.232	19.52	10.368	0.12656	5.472	22.24	3.808	13.52	9.936	9.808	4.24	3.408	11.04	8.4	8.48	5.84	11.536	5.152
PE(P-18:0_22:5)	GP	PE-P	777.567241	[M+H]+	C45H80NO7P	3.104	5.136	3.68	4.048	3.008	4.032	1.4896	2.112	2.144	1.84	2.528	1.856	7.424	0.344	15.168	7.68	1.2736	7.648	3.6	7.2	1.984	2	4.88	4.208	4.912	3.744	8.272	3.936
PE(P-16:0_22:6)	GP	PE-P	747.520291	[M+H]+	C43H74NO7P	304	492.8	348.8	340.8	505.6	347.2	235.2	364.8	438.4	123.52	392	550.4	755.2	39.04	718.4	1036.8	117.44	443.2	380.8	460.8	259.2	168	452.8	385.6	286.4	211.2	404.8	196.8
PE(P-18:0_22:6)	GP	PE-P	775.551591	[M+H]+	C45H78NO7P	20.96	32	26.4	22.88	22.24	23.52	11.888	18.08	15.136	6.56	13.472	26.72	39.52	1.728	56.16	44.64	14.24	40.64	26.08	49.44	25.76	19.04	37.76	38.88	35.36	21.92	32	22.4
PE(P-18:1_22:6)	GP	PE-P	773.535941	[M+H]+	C45H76NO7P	8.64	18.88	11.504	12.88	6.688	16.8	4.256	7.392	5.552	5.152	5.776	23.68	14	0.3024	7.424	22.88	5.056	20	19.52	23.36	10.72	8.656	37.92	21.76	19.36	7.728	18.72	10.64
SM(d18:0/12:0)	SP	SM	648.520625	[M+H]+	C35H73N2O6P	2.192	0.9056	0.36	2.448	1.5008	0.888	0.3424	0.6128	0.4816	1.68	1.888	0.7344	1.5664	0.10864	0.84	1.1776	1.2144	0.3968	1.0288	1.792	1.0016	0.9632	1.0784	1.2176	1.1536	0.9888	0.8448	0.568
SM(d18:0/14:0)	SP	SM	676.551925	[M+H]+	C37H77N2O6P	3.232	3.184	3.168	3.44	4.208	5.728	1.3152	1.304	1.648	0.12336	4.032	2.208	1.5584	0.1808	0.7552	5.232	5.92	6.928	5.184	4.128	4.4	3.888	2.128	2.752	2.416	4.048	3.904	1.6
SM(d18:1/12:0)	SP	SM	646.504975	[M+H]+	C35H71N2O6P	0.8688	0.8976	0.9856	0.848	0.7456	1.256	0.7312	0.4704	0.5312	0.06704	0.8064	0.5088	1.2096	0.0632	0.4944	2.08	0.7872	1.3408	0.712	0.936	1.1232	1.0656	0.9552	1.0992	0.7232	1.3808	0.848	0.6656
SM(d18:1/14:0)	SP	SM	674.536275	[M+H]+	C37H75N2O6P	0.6848	0.6336	0.6144	0.736	0.6272	1.1232	0.416	0.3056	0.3424	0.04704	0.6656	0.4816	0.5424	0.03104	0.2512	1.3984	0.9072	1.0064	0.7648	0.616	0.712	0.96	0.96	0.992	0.5056	0.776	0.5072	0.4512
SM(d18:1/15:0)	SP	SM	688.551925	[M+H]+	C38H77N2O6P	23.68	21.6	20.96	23.36	7.536	21.6	12.752	8.208	11.52	1.5088	17.12	19.2	19.2	0.8928	8.816	47.52	37.12	24	21.44	16.16	32.8	40.16	37.6	39.68	16.32	25.44	17.6	15.92
SM(d18:1/16:0)	SP	SM	702.567575	[M+H]+	C39H79N2O6P	8.272	6.752	7.264	6.432	5.584	9.984	4.272	3.472	4.48	0.3856	7.904	6.688	6.256	0.4048	4.016	12.512	8.592	6.8	9.536	4.272	6.752	6.304	6.528	10.864	3.312	7.616	4.304	3.104
SM(d18:1/17:0)	SP	SM	716.583225	[M+H]+	C40H81N2O6P	56.64	48.64	49.76	49.44	18.72	28.96	23.2	16.16	24.16	4.112	44.64	67.2	49.44	2.448	21.12	117.28	84	30.88	38.72	26.56	72.8	88.64	68.48	80	33.44	42.24	30.56	30.56
SM(d18:2/14:0)	SP	SM	672.520625	[M+H]+	C37H73N2O6P	0.6752	0.6064	0.6704	0.6016	0.44	0.6672	0.4928	0.3584	0.392	0.09824	0.64	0.5232	0.84	0.03952	0.3424	2.4	0.4704	0.8592	0.4192	0.3888	0.6768	0.9264	0.7216	0.6352	0.5376	0.5728	0.5088	0.4064
SM(d18:1/19:1)	SP	SM	740.583225	[M+H]+	C42H81N2O6P	26.4	27.68	26.08	26.88	22.4	32.8	18.88	22.4	21.44	16.32	28.16	28	26.4	22.24	21.28	26.4	26.56	30.08	27.84	36.32	28.16	29.6	27.68	32.32	21.92	27.36	27.84	21.44
SM(d18:1/22:1)	SP	SM	784.645825	[M+H]+	C45H89N2O6P	6.928	10.8	8.016	7.616	3.312	9.488	3.856	2.496	3.568	0.9104	5.536	8.4	5.056	0.4304	2.944	18.24	8.032	7.072	9.536	6.384	8.72	13.136	12.08	13.968	5.888	15.184	6.352	5.088
SM(d18:2/18:1)	SP	SM	726.567575	[M+H]+	C41H79N2O6P	1.504	1.088	0.976	0.9008	0.88	1.0784	0.9664	0.9472	0.8736	1.5568	1.2176	0.9312	0.9456	1.304	1.0048	1.4528	1.1936	1.152	1.1072	1.0416	0.88	0.9632	0.9024	1.0416	1.0784	0.9488	1.4944	0.808
SM(d18:2/23:1)	SP	SM	796.645825	[M+H]+	C46H89N2O6P	18.24	19.68	19.52	15.664	28.16	41.28	6.544	9.84	10.592	0.7104	18.4	9.984	30.56	1.1744	51.68	21.92	7.376	21.76	17.76	26.72	13.216	19.04	17.44	23.68	10.08	16	12.416	8.464
SM(d18:2/24:3)	SP	SM	806.630175	[M+H]+	C47H87N2O6P	57.76	81.92	60	52.8	30.88	85.76	47.52	67.36	60	8.8	98.88	69.92	217.6	9.152	62.88	409.6	12.496	34.88	28.48	25.12	16.96	11.712	24	10	52.8	35.52	19.04	27.36
TG(10:0_16:0_12:0)	GL	TG	666.57984	[M+NH4]+	C41H78O6	3.0496	2.6176	2.72	2.4576	2.6176	1.8208	2.784	2.72	5.152	4.064	2.672	3.264	3.648	4.064	2.0512	2.9408	2.64	4.096	1.8304	2.4768	3.1808	4.16	4.416	2.6272	3.184	3.12	1.3504	1.7984
TG(14:0_16:0_16:0)	GL	TG	778.70504	[M+NH4]+	C49H94O6	18.4	11.792	11.584	15.408	20	10.352	14.016	5.152	30.56	29.6	16	13.68	15.712	19.04	11.36	20.48	13.344	19.2	10.016	13.76	12.064	12.544	20.8	14.992	20.8	21.76	11.392	23.52
TG(16:0_16:0_16:0)	GL	TG	806.73634	[M+NH4]+	C51H98O6	149.3336	149.3336	102.9336	118.4	124.8	66.13336	105.8136	91.6264	284.8	119.4664	116.2664	79.25336	137.6	150.4	96.5336	97.6	87.7864	118.4	58.02664	114.1336	92.16	116.2664	144	102.9336	85.3336	129.0664	136.5336	84.9064
TG(14:0_16:0_18:0)	GL	TG	806.73634	[M+NH4]+	C51H98O6	12.672	10.752	8	8.48	5.664	5.024	7.744	8.832	25.632	9.312	9.504	5.76	12.768	11.584	8.928	10.432	6.336	11.616	6.592	8.384	9.792	10.176	15.104	7.68	5.632	10.4	10.784	6.496
TG(16:0_16:0_18:0)	GL	TG	834.76764	[M+NH4]+	C53H102O6	356.8	344	294.4	337.6	411.2	270.4	292.8	312	848	379.2	361.6	313.6	363.2	320	441.6	286.4	267.2	456	323.2	392	259.2	316.8	344	289.6	364.8	497.6	409.6	267.2
TG(16:0_17:0_18:0)	GL	TG	848.78329	[M+NH4]+	C54H104O6	2.4384	1.1264	2.1088	2.1856	2.4352	1.216	2.4096	2.1088	2.7296	3.616	1.2096	1.7536	2.5376	2.1152	1.8624	1.8048	1.4016	3.52	2.9216	2.7328	1.5232	1.8784	2.3168	1.8272	2.304	2.9504	3.1488	2.1344
TG(16:0_17:0_18:0)	GL	TG	848.78329	[M+NH4]+	C54H104O6	1.76	1.7824	2.0224	2.0576	1.8112	1.3504	2.6592	1.6608	2.0896	4.384	2.1472	2.72	2.1344	2.3808	2.4064	2.8768	1.9296	2.224	2.4544	2.0288	1.7632	2.3296	2.1088	1.8752	1.5488	1.8656	2.2688	1.36
TG(16:0_18:0_18:0)	GL	TG	862.79894	[M+NH4]+	C55H106O6	254.08	387.2	248.96	243.2	390.4	201.6	314.88	332.8	646.4	563.2	281.28	326.4	419.2	345.6	281.28	332.8	284.48	435.2	329.6	380.8	323.2	312.64	329.6	296.64	289.28	473.6	315.2	230.08
TG(14:0_18:0_20:0)	GL	TG	862.79894	[M+NH4]+	C55H106O6	2.7296	2.1472	1.7984	1.8112	2.9024	1.92	2.272	2.2208	3.584	3.0112	1.6416	1.8976	3.1552	2.2464	2.3776	2.1056	1.3184	2.6144	2.3008	2.0256	2.4832	1.9328	2.896	1.9136	2.2784	2.32	2.1088	1.4176
TG(16:0_18:0_18:0)	GL	TG	862.79894	[M+NH4]+	C55H106O6	380.8	345.6	248	246.4	422.4	235.2	236.8	363.2	436.8	494.4	227.2	257.6	296	350.4	324.8	329.6	256	427.2	352	300.8	168	238.4	312	267.2	249.6	475.2	323.2	230.4
TG(15:0_18:0_20:0)	GL	TG	876.81459	[M+NH4]+	C56H108O6	1.584	1.5232	1.9392	1.1104	1.7184	1.3344	1.8848	2.0256	3.1904	3.264	1.984	1.5392	1.568	2.4096	1.872	1.9072	2.1632	2.336	2.368	1.9616	1.2864	1.0496	1.8112	1.2704	1.5168	2.7744	1.1232	1.5296
TG(17:0_18:0_18:0)	GL	TG	876.81459	[M+NH4]+	C56H108O6	1.36	0.8992	0.688	0.6816	0.9152	0.768	1.2352	0.8288	1.0528	1.2576	1.1424	0.816	1.1648	1.2416	1.0336	0.7584	1.1168	1.1712	1.2064	1.0144	0.928	0.7584	1.0176	0.6144	1.0144	1.248	0.5088	0.576
TG(18:0_18:0_18:0)	GL	TG	890.83024	[M+NH4]+	C57H110O6	87.1464	87.4664	90.4536	67.73336	97.0664	68.05336	82.4536	87.5736	118.4	110.9336	77.76	85.9736	98.9864	104.32	77.76	75.94664	100.2664	93.44	112	106.1336	78.82664	73.28	94.5064	80.8536	58.66664	138.6664	81.92	54.72
TG(16:0_18:0_20:0)	GL	TG	890.83024	[M+NH4]+	C57H110O6	2.5696	2.5376	2.8288	2.4608	4	2.1056	2.6624	2.5216	3.712	4.288	2.5568	2.5152	3.296	3.552	2.8	1.9072	2.8224	2.7264	3.0176	3.744	2.6656	2.1088	2.5088	3.0336	2.064	3.616	1.8784	2.0768
TG(16:0_18:0_20:0)	GL	TG	890.83024	[M+NH4]+	C57H110O6	4.896	4.256	4.448	2.704	5.344	3.0144	3.744	3.872	5.088	8.16	3.968	4.512	3.84	4.032	4.16	3.52	3.584	4.48	4.576	5.184	3.552	3.648	2.5792	4.672	2.864	5.952	3.552	2.9056
TG(16:0_18:0_22:0)	GL	TG	918.86154	[M+NH4]+	C59H114O6	2.432	2.9248	2.32	1.872	2.8864	2.2784	2.4864	2.2432	3.584	3.936	2.4512	3.0112	2.9312	2.5216	2.9312	1.904	2.2176	3.456	2.3904	3.296	2.1248	2.944	2.4032	2.7392	2.2656	3.68	2.6432	2.0128
TG(8:0_14:0_18:1)	GL	TG	692.59549	[M+NH4]+	C43H80O6	0.8288	0.6528	1.5104	1.8368	1.8464	1.6352	1.5584	1.1552	2.8352	2.3712	0.896	1.3504	1.3536	2.0544	1.2576	0.96	1.2512	1.04	1.2992	0.9504	0.8672	2.5376	2.4864	1.6928	1.0112	1.792	0.608	1.1904
TG(12:0_14:0_16:1)	GL	TG	720.62679	[M+NH4]+	C45H84O6	5.088	7.072	7.04	4.32	4.928	4.128	6.848	5.056	14.656	8.576	4.032	5.536	6.816	7.264	7.488	4.992	9.472	6.72	5.344	6.016	5.728	7.2	12.8	4.16	5.6	6.592	3.552	5.568
TG(12:0_15:0_16:1)	GL	TG	734.64244	[M+NH4]+	C46H86O6	8.48	10.272	11.296	11.008	7.296	8.32	12.448	5.856	24.032	18.336	8.8	8.032	9.536	11.584	9.984	12.384	10.88	11.328	7.872	8.16	6.048	13.76	18.72	8.896	10.4	10.08	7.488	10.944
TG(12:0_16:0_16:1)	GL	TG	748.65809	[M+NH4]+	C47H88O6	23.008	20.48	29.472	39.68	34.56	27.2	36.8	18.88	74.88	53.12	15.04	26.912	29.024	38.72	25.856	18.88	30.496	20	22.4	33.6	30.752	42.24	46.08	22.464	36.16	27.616	16	32.96
TG(12:0_14:0_18:1)	GL	TG	748.65809	[M+NH4]+	C47H88O6	22.208	22.624	28.512	32.64	25.376	22.272	39.68	28.16	80.96	39.04	20.512	27.456	24.384	41.28	34.88	27.648	30.784	18.688	26.016	29.856	25.504	43.2	36.16	24.832	29.056	24.96	22.272	26.208
TG(12:0_15:0_18:1)	GL	TG	762.67374	[M+NH4]+	C48H90O6	2.5088	2.5504	3.1168	3.552	4.256	2.4224	3.968	4.928	8.64	5.44	3.648	3.712	2.7712	2.6112	2.2816	3.392	4.512	1.9264	2.624	3.424	3.744	3.424	5.792	3.232	3.328	3.392	2.1312	3.52
TG(14:0_16:0_16:1)	GL	TG	776.68939	[M+NH4]+	C49H92O6	22.784	27.296	30.016	28.512	41.6	19.616	32.64	19.04	89.28	41.6	29.312	24.608	29.152	51.84	46.08	34.56	44.8	42.56	17.856	33.92	27.424	42.88	40.32	25.152	30.112	26.208	23.488	39.36
TG(15:0_16:0_16:1)	GL	TG	790.70504	[M+NH4]+	C50H94O6	25.888	30.464	30.88	20.192	35.2	23.904	25.088	22.944	74.56	38.08	40	23.008	26.368	30.432	38.72	25.312	30.72	30.592	22.208	33.92	22.624	15.84	33.28	20.224	20.704	35.52	26.752	20.576
TG(16:0_16:0_16:1)	GL	TG	804.72069	[M+NH4]+	C51H96O6	22.4	28.32	20.16	26.72	28.32	31.52	28.32	20	59.2	29.76	22.56	31.2	42.56	31.36	24.48	24.64	20.32	39.68	15.584	35.2	14.896	22.4	32.96	25.92	29.28	29.6	35.2	21.6
TG(14:0_16:0_18:1)	GL	TG	804.72069	[M+NH4]+	C51H96O6	21.344	18.528	19.392	18.688	18.784	19.424	11.968	14.112	33.6	36.48	14.88	13.376	17.12	18.336	14.784	18.976	14.816	20.032	8.896	10.976	16.48	16.96	25.344	10.976	12.384	15.264	15.04	12
TG(14:0_16:0_18:1)	GL	TG	804.72069	[M+NH4]+	C51H96O6	19.392	17.664	15.296	12.128	19.008	16.96	12.544	16.16	53.76	31.456	19.328	12.16	13.344	27.264	15.168	9.12	13.344	14.528	13.376	14.272	13.632	17.6	24.64	10.08	9.728	19.776	12.448	8.192
TG(16:0_16:0_18:1)	GL	TG	832.75199	[M+NH4]+	C53H100O6	24.32	29.6	30.4	23.36	23.68	20.96	17.76	28.64	73.44	33.92	21.6	22.72	29.6	36.16	22.56	20	23.68	32.32	24	16.8	16.32	18.72	39.68	11.696	21.6	30.72	21.6	21.44
TG(16:0_16:0_18:1)	GL	TG	832.75199	[M+NH4]+	C53H100O6	26.432	29.92	26.688	17.824	30.56	21.472	14.816	27.52	67.84	32.64	20.864	25.28	28.384	18.496	24.096	29.888	20.32	31.904	25.76	27.136	25.6	22.816	48	11.392	15.328	31.552	26.08	16.096
TG(16:0_18:0_18:1)	GL	TG	860.78329	[M+NH4]+	C55H104O6	5.632	6.176	4.608	4.672	6.304	6.784	6.496	5.888	10.144	13.92	4.832	6.176	6.272	9.088	7.36	12.224	5.856	6.816	8	5.92	4.448	4.16	5.312	3.456	3.808	8.928	6.528	4.288
TG(16:0_18:0_18:1)	GL	TG	860.78329	[M+NH4]+	C55H104O6	6.816	6.08	5.568	6.176	8.096	7.296	5.12	6.656	11.136	18.464	5.824	6.816	5.664	8.096	7.168	11.36	6.4	8.608	8.672	7.616	6.048	3.84	7.776	4.64	5.088	9.984	5.792	4.96
TG(18:0_18:0_18:1)	GL	TG	888.81459	[M+NH4]+	C57H108O6	0.9552	0.984	0.9072	0.9184	1.232	0.8576	1.0368	1.08	1.4704	2.432	1.0208	0.7248	1.176	1.888	1.2032	2.08	1.1376	1.152	1.984	1.3744	0.9584	0.6672	0.9984	0.6896	0.6928	1.344	1.1728	0.7984
TG(8:0_16:1_18:1)	GL	TG	718.61114	[M+NH4]+	C45H82O6	2.6208	1.9456	3.68	2.8896	4.384	2.8352	4.32	2.3744	6.656	3.1296	3.36	2.3744	3.488	3.296	3.184	2.2016	4.416	3.1104	2.096	2.624	3.1136	4.672	4.896	3.232	3.2	2.3104	1.9904	3.072
TG(14:0_14:1_16:1)	GL	TG	746.64244	[M+NH4]+	C47H86O6	10.784	13.92	14.624	16.768	22.528	12.608	20.032	11.904	37.12	26.464	15.872	15.52	18.272	19.744	18.816	17.44	22.848	16.864	12.256	15.04	17.312	24.192	25.504	15.04	16.704	19.776	9.568	15.744
TG(10:0_16:0_18:2)	GL	TG	746.64244	[M+NH4]+	C47H86O6	0.7936	1.3344	1.7056	1.4848	1.3696	0.864	1.4368	0.8576	3.552	1.7216	1.184	1.1264	2.3104	2.6304	0.9696	1.3824	1.7664	1.1072	1.44	1.3952	1.1488	1.664	1.424	1.1808	0.6368	1.4176	0.8672	1.6288
TG(12:0_14:0_18:2)	GL	TG	746.64244	[M+NH4]+	C47H86O6	4.672	3.776	4.256	4.608	5.664	3.392	3.968	4.64	16.192	7.232	3.552	4.192	5.472	6.912	4.288	6.08	6.912	6.624	4.448	4.832	5.504	6.272	6.976	4.96	4.704	4.704	3.1136	4.48
TG(14:0_14:1_16:1)	GL	TG	746.64244	[M+NH4]+	C47H86O6	9.504	8.736	10.144	11.264	12.064	8.8	10.912	9.536	30.432	12.736	8.544	7.296	11.168	14.112	9.024	14.976	14.368	11.584	10.56	9.024	9.28	8.864	17.184	10.784	13.408	11.424	6.88	8.896
TG(14:1_16:0_16:1)	GL	TG	774.67374	[M+NH4]+	C49H90O6	7.296	7.392	7.424	9.28	10.432	5.12	10.304	5.92	20.96	9.056	7.968	8.832	8.64	13.824	9.472	8.096	11.712	11.36	7.136	8.48	5.824	8.928	14.592	8.736	6.208	6.016	5.568	11.232
TG(14:0_14:1_18:1)	GL	TG	774.67374	[M+NH4]+	C49H90O6	5.184	2.3968	4.704	5.696	6.784	4.672	6.208	4.224	11.52	8.8	3.456	3.968	7.104	7.2	3.0336	6.688	5.376	5.952	4.64	5.088	5.376	6.368	7.808	3.0976	3.968	6.112	3.456	6.752
TG(14:1_16:0_16:1)	GL	TG	774.67374	[M+NH4]+	C49H90O6	15.232	9.824	19.232	22.56	19.744	14.592	23.52	15.008	40.96	22.304	18.624	13.856	16.256	29.152	17.728	17.92	21.312	18.368	14.432	15.136	19.36	20.736	21.056	16.448	15.936	18.848	13.376	21.344
TG(15:0_16:1_16:1)	GL	TG	788.68939	[M+NH4]+	C50H92O6	20	19.36	21.76	19.84	26.88	20.32	20.32	15.6	55.04	37.12	23.36	16.32	18.24	35.36	23.84	21.44	18.56	27.2	16.32	25.28	15.248	20.32	33.76	12	20.16	29.12	21.44	15.184
TG(15:0_16:1_16:1)	GL	TG	788.68939	[M+NH4]+	C50H92O6	8.992	9.056	9.824	9.28	10.528	10.4	8.768	6.368	21.024	19.04	14.272	8.768	10.304	13.472	10.208	9.44	10.4	8.96	8.48	11.232	9.184	9.024	16.672	5.088	8.288	13.76	9.376	6.528
TG(14:0_16:1_17:1)	GL	TG	788.68939	[M+NH4]+	C50H92O6	5.792	3.424	5.44	3.296	5.632	3.52	3.232	3.808	9.696	6.816	6.176	4.192	4.608	7.552	4.288	4.96	3.36	4.352	3.488	5.344	3.84	3.68	8.32	3.36	3.68	5.344	4.032	3.712
TG(16:0_16:1_16:1)	GL	TG	802.70504	[M+NH4]+	C51H94O6	22.368	23.68	29.824	20.928	28.96	23.136	22.432	19.04	67.84	38.72	24.768	26.368	17.76	30.72	23.936	27.616	23.68	21.664	17.28	25.12	19.776	14.208	30.624	23.616	13.216	27.264	24.512	19.008
TG(14:0_16:1_18:1)	GL	TG	802.70504	[M+NH4]+	C51H94O6	14.528	16.608	20.64	9.568	17.728	12.096	13.6	14.272	36.16	18.848	17.92	13.088	17.088	20.032	16.32	11.168	13.952	15.456	16.672	16.384	12.992	15.392	18.944	12.448	10.176	13.248	14.272	15.488
TG(14:0_16:1_18:1)	GL	TG	802.70504	[M+NH4]+	C51H94O6	8.128	7.072	7.008	6.304	11.136	7.392	10.208	9.856	21.024	12.48	11.104	8.608	8.576	10.432	10.048	8.16	9.312	11.232	7.904	8.384	10.816	7.264	14.08	7.232	6.176	11.744	6.72	6.624
TG(16:0_16:1_17:1)	GL	TG	816.72069	[M+NH4]+	C52H96O6	13.312	9.856	8	7.04	13.184	9.76	9.888	7.808	34.88	13.888	14.944	6.816	9.92	17.504	9.12	7.104	8.928	11.456	9.12	11.616	8.288	9.632	12.576	8.928	11.2	12.608	11.328	9.28
TG(15:0_16:1_18:1)	GL	TG	816.72069	[M+NH4]+	C52H96O6	7.68	8.992	5.696	4.96	11.136	5.408	5.696	5.728	15.232	8.352	7.968	6.176	5.248	10.496	7.744	7.104	8	10.432	5.152	5.568	4.192	5.888	8.384	5.344	4.96	7.904	8.352	6.016
TG(16:0_16:1_18:1)	GL	TG	830.73634	[M+NH4]+	C53H98O6	47.36	42.24	45.76	32.32	56.32	34.88	35.52	27.008	128.96	56.64	55.68	28.096	40.32	64	36.8	40.64	31.968	45.76	32.96	55.36	34.24	50.24	57.92	31.808	32.96	35.2	33.92	23.808
TG(16:0_16:1_18:1)	GL	TG	830.73634	[M+NH4]+	C53H98O6	27.52	31.328	33.28	30.176	35.52	35.2	26.272	20.96	107.84	46.72	33.28	20.064	29.312	28.64	32	19.968	27.552	38.08	19.456	34.24	25.952	34.56	40.32	14.368	27.552	31.808	29.376	22.016
TG(16:0_17:1_18:1)	GL	TG	844.75199	[M+NH4]+	C54H100O6	4.128	2.8192	3.456	3.52	5.376	2.592	3.648	3.616	4.928	11.456	2.7872	2.7744	4.192	6.816	3.232	5.632	4.16	3.776	3.936	3.424	2.4896	3.1584	3.776	2.5056	3.0688	3.616	3.264	2.4256
TG(16:0_18:1_18:1)	GL	TG	858.76764	[M+NH4]+	C55H102O6	15.056	12.704	9.856	11.232	18.08	7.6	10.656	10.576	44.48	44.16	10.816	11.216	16.64	24.48	12.864	16.8	12.224	16.48	16.16	13.2	10.704	10.288	16.32	10.384	9.584	17.44	13.552	8.752
TG(16:0_18:0_18:2)	GL	TG	858.76764	[M+NH4]+	C55H102O6	3.0496	2.6816	3.1008	2.736	3.488	1.9584	2.496	3.1872	4.544	8.416	2.1952	2.5568	2.784	4.832	2.352	6.592	3.0784	2.8832	3.552	2.8864	1.8848	2.2272	3.488	2.6624	2	3.552	2.4512	1.9456
TG(16:0_16:1_20:1)	GL	TG	858.76764	[M+NH4]+	C55H102O6	11.008	11.456	7.328	11.52	14.4	9.472	9.92	13.504	43.2	44.48	9.504	12.832	12.928	20.192	12.128	22.24	8.704	14.016	11.936	15.136	9.376	11.264	17.024	13.056	8.064	15.744	11.04	9.088
TG(18:0_18:1_18:1)	GL	TG	886.79894	[M+NH4]+	C57H106O6	2.3584	2.24	1.9104	2.192	2.5984	2.7776	2.2688	1.9488	5.312	5.088	1.7472	1.5744	1.9488	2.4576	1.8784	5.984	1.6192	1.5616	2.848	2.2304	1.248	1.312	2.0128	1.9296	1.5008	2.7264	2.4896	1.3152
TG(18:0_18:1_18:1)	GL	TG	886.79894	[M+NH4]+	C57H106O6	2.176	1.952	2.16	1.68	2.704	1.4736	1.872	2.288	5.712	6.352	1.744	1.904	2.944	3.04	1.84	3.584	1.856	2.784	2.736	2.016	1.616	1.6	2.816	2.144	1.368	2.272	2.592	1.1744
TG(14:1_14:1_16:1)	GL	TG	744.62679	[M+NH4]+	C47H84O6	1.5488	1.5168	2.4704	1.776	3.0912	2.2208	2.4192	1.8976	4.128	4.608	2.3584	2.1344	2.9664	2.9024	1.9264	2.4448	2.8576	2.496	1.4048	2.5792	2.6848	2.0896	2.56	2.4928	2.6176	2.752	1.9072	2.5248
TG(14:1_15:1_16:1)	GL	TG	758.64244	[M+NH4]+	C48H86O6	1.8656	1.808	1.6576	1.8368	2.7936	1.2672	2.1088	1.632	3.968	2.2208	2.3008	1.6832	2.0032	1.6832	1.872	1.7984	2.8096	1.328	1.344	1.5008	1.4624	1.936	3.0272	1.4752	1.6544	1.7088	0.7904	1.6448
TG(14:1_16:1_16:1)	GL	TG	772.65809	[M+NH4]+	C49H88O6	6.784	6.976	6.336	7.616	7.264	5.216	9.184	5.408	17.952	11.296	7.072	5.344	7.488	9.824	5.664	8.704	9.248	6.816	5.952	6.816	6.08	12.8	11.136	7.744	6.176	9.568	4.64	7.776
TG(14:1_16:1_18:1)	GL	TG	800.68939	[M+NH4]+	C51H92O6	39.68	51.52	57.28	37.76	69.12	48	37.12	36.8	113.6	65.92	43.52	33.28	45.12	59.52	48.32	38.4	36.16	33.92	34.56	40.32	37.12	34.56	64	27.904	45.12	41.92	45.76	40.96
TG(14:1_16:1_18:1)	GL	TG	800.68939	[M+NH4]+	C51H92O6	3.584	2.9344	4.576	3.392	5.344	3.1264	2.3456	2.7904	9.92	5.28	4.832	2.928	3.872	5.248	2.5248	3.168	2.9984	2.176	2.5824	3.264	2.1088	2.7328	6.144	2.0928	3.616	2.6464	2.9728	2.7392
TG(14:0_16:1_18:2)	GL	TG	800.68939	[M+NH4]+	C51H92O6	6.08	6.784	7.616	6.912	6.528	5.984	7.648	5.216	22.56	11.904	6.816	4.96	6.016	8.192	6.144	5.984	5.408	6.88	4.992	5.344	5.6	6.304	8.352	2.96	6.848	8.064	6.112	4.64
TG(14:0_16:1_18:2)	GL	TG	800.68939	[M+NH4]+	C51H92O6	2.5632	2.3136	2.4704	1.4944	3.04	2.6176	2.1184	1.8816	6.24	2.1664	3.232	2.2176	2.1568	2.4992	2.48	2.432	2.1184	1.6992	1.2192	2.4608	2.0416	1.456	3.296	1.4752	1.8752	3.232	2.416	2.0736
TG(16:0_14:1_18:2)	GL	TG	800.68939	[M+NH4]+	C51H92O6	7.552	5.632	4.448	5.376	7.936	6.624	3.616	4.32	18.72	8.32	5.472	5.888	4.48	6.048	5.12	5.6	5.44	4.416	4.928	4.224	5.664	5.088	4.896	3.264	3.2	5.408	5.6	3.776
TG(16:1_16:1_17:1)	GL	TG	814.70504	[M+NH4]+	C52H94O6	4.24	5.712	4.384	4.496	5.872	4.848	5.088	5.696	17.92	7.44	6.544	4.88	6.08	6.672	6.304	6.08	5.312	8.32	3.616	6.08	4.992	4.304	8.384	5.536	5.344	6.544	5.536	3.28
TG(16:1_16:1_18:1)	GL	TG	828.72069	[M+NH4]+	C53H96O6	12.672	12.928	15.008	12.288	12.992	11.008	12.352	10.048	28.896	21.28	15.296	10.432	12.608	18.112	14.432	13.92	13.152	10.592	11.552	15.552	8.736	12.96	17.888	7.936	10.848	12.768	11.456	10.144
TG(16:0_16:1_18:2)	GL	TG	828.72069	[M+NH4]+	C53H96O6	14.272	11.264	11.424	9.408	12.224	10.144	8.48	9.408	33.92	15.136	12.352	7.552	10.752	16.512	8.32	12.928	10.496	11.008	9.888	12.864	8.8	12.832	16.512	9.696	10.048	9.696	8.064	10.688
TG(16:0_18:1_18:2)	GL	TG	856.75199	[M+NH4]+	C55H100O6	3.232	2.5472	5.44	2.9984	3.744	2.7744	2.4256	1.7504	8.672	15.168	1.9872	2.928	4.864	6.176	3.1008	10.112	2.0512	4.736	4.48	3.68	1.904	2.5664	4.256	2.5344	1.8272	3.36	4.096	2.0224
TG(16:0_18:1_18:2)	GL	TG	856.75199	[M+NH4]+	C55H100O6	7.424	6.4	7.36	6.88	9.856	8.288	7.968	6.112	14.016	22.528	5.952	6.88	10.176	10.112	7.744	13.152	5.504	8.736	8.64	5.376	4.8	7.264	8.192	5.632	4.992	7.744	5.984	4.736
TG(18:1_18:1_18:1)	GL	TG	884.78329	[M+NH4]+	C57H104O6	7.52	7.050664	5.824	6.058664	5.578664	3.733336	3.904	4.277336	58.24	18.24	3.882664	6.325336	8.81064	10.16536	5.258664	8.69336	4.832	5.738664	4.949336	5.92	2.56	3.424	8.34136	3.744	2.528	6.389336	9.888	3.285336
TG(14:0_16:1_18:3)	GL	TG	798.67374	[M+NH4]+	C51H90O6	1.984	1.4688	1.184	1.632	1.8368	1.76	1.1904	2.4928	3.1456	4.032	3.04	2.2624	2.2272	1.7824	1.5456	1.7824	1.808	1.664	1.0912	1.3632	0.9952	1.9328	2.0416	1.4912	2.336	2.5376	2.0064	1.4848
TG(16:1_16:1_18:2)	GL	TG	826.70504	[M+NH4]+	C53H94O6	2.64	2.656	3.072	2.544	3.472	2.128	2.96	2.672	7.2	4.688	4.176	2.128	3.296	4	2.16	3.04	2.656	2.448	2.016	2.624	1.952	2.672	4	1.648	2.752	3.504	2.432	2.304
TG(16:1_16:1_18:2)	GL	TG	826.70504	[M+NH4]+	C53H94O6	3.904	3.808	4.448	5.344	5.632	4.608	4.672	5.28	12.128	9.472	6.08	3.648	4.16	4.64	4.416	6.304	4.416	3.488	2.8992	5.44	4.224	4.832	7.648	3.392	5.888	4.896	5.184	3.84
TG(16:1_18:1_18:2)	GL	TG	854.73634	[M+NH4]+	C55H98O6	8.416	5.792	8.64	6.304	9.248	6.752	9.216	6.816	16.032	21.568	7.488	8.608	10.88	11.84	8.224	13.792	8.128	7.264	9.344	10.816	6.496	7.648	7.488	7.008	6.72	9.92	6.976	6.88
TG(16:0_18:2_18:2)	GL	TG	854.73634	[M+NH4]+	C55H98O6	2.2016	1.5776	2.3712	2.9216	4.032	2.1824	2.8832	2.8288	7.2	8.288	2.5856	2.2144	4.128	3.712	2.832	4.736	2.9088	3.456	3.936	4	1.9328	3.232	2.96	2.448	1.92	5.248	3.552	1.7792
TG(18:1_18:1_18:2)	GL	TG	882.76764	[M+NH4]+	C57H102O6	4.032	5.216	4.48	3.84	5.504	5.44	5.056	5.28	14.784	10.752	3.584	5.792	7.072	6.816	6.08	6.88	3.776	4.448	5.568	5.792	3.648	3.808	4.224	4.512	2.6336	7.424	7.776	4.128
TG(18:1_18:1_18:2)	GL	TG	882.76764	[M+NH4]+	C57H102O6	2.608	2.816	3.104	2.144	3.264	1.2864	2.16	2.608	12.8	6.528	1.5744	2.112	3.808	4.064	2.048	4.656	2.208	2.288	1.84	2.848	1.856	1.952	2.88	1.728	1.888	3.392	5.472	1.616
TG(16:0_18:0_20:4)	GL	TG	882.76764	[M+NH4]+	C57H102O6	0.7008	0.5088	0.8064	0.6048	1.1744	0.4512	0.7936	0.4352	0.992	1.6864	0.3168	0.4576	0.4352	0.9664	0.5952	1.12	0.7392	0.608	0.5056	0.6912	0.336	0.27296	0.8448	0.18944	0.18112	0.5504	1.0496	0.4832
TG(16:1_18:1_18:3)	GL	TG	852.72069	[M+NH4]+	C55H96O6	0.6272	0.6112	0.4672	0.656	1.1552	0.4544	0.4288	0.5056	0.8288	2.0608	0.6752	0.6688	0.672	0.7936	0.4896	1.0752	0.56	0.9824	1.0592	0.4992	0.6304	0.3424	0.7904	0.4032	0.6752	0.2608	0.8192	0.3904
TG(18:1_18:2_18:2)	GL	TG	880.75199	[M+NH4]+	C57H100O6	2.4	2.032	2.208	2.496	3.504	2.192	2.032	2.32	5.536	7.28	2.704	1.856	3.04	3.696	2.672	5.152	2.704	2.944	3.68	4.048	1.5952	1.776	3.232	2.576	2.032	3.744	3.792	2.64
TG(16:0_18:2_20:4)	GL	TG	878.73634	[M+NH4]+	C57H98O6	4.768	3.184	4.32	5.152	6.08	6.08	4.48	4.448	9.856	11.2	4.832	4.832	6.688	7.904	4.992	6.048	5.312	6.112	9.696	6.048	4.32	5.28	6.912	4.8	4.192	6.88	6.56	4.736
TG(18:1_18:2_18:3)	GL	TG	878.73634	[M+NH4]+	C57H98O6	0.6464	0.5824	0.5184	0.6336	0.8256	0.88	0.4352	0.5568	0.8576	2.3424	0.5728	0.64	0.56	0.768	0.5952	1.0656	0.4608	1.0816	0.8352	0.7872	0.5888	0.27488	1.0976	0.29248	0.368	0.848	1.9488	0.4928
TG(18:1_18:2_18:3)	GL	TG	878.73634	[M+NH4]+	C57H98O6	0.88	0.6528	0.6208	0.6848	0.7168	0.9024	0.6976	0.704	0.9376	2.6464	0.528	0.768	0.6176	0.8448	0.5984	0.7552	0.6944	1.1616	0.9312	0.8672	0.4544	0.768	0.9312	0.5152	0.29216	0.7296	1.792	0.4384
TG(18:2_18:2_18:3)	GL	TG	876.72069	[M+NH4]+	C57H96O6	0.4896	0.2432	0.4896	0.2848	0.6832	0.4608	0.32	0.4208	0.5456	1.0064	0.2512	0.3712	0.3808	0.7184	0.3808	0.5344	0.424	0.5392	0.3648	0.5504	0.3024	0.3552	0.5152	0.3504	0.2656	0.4832	0.7616	0.312
MG(22:5)	GL	MG	404.29266	[M+NH4]+	C25H40O4	1240	1316	1508	1264	1168	1492	1344	1216	1504	1204	1128	1044	1308	1128	1192	1464	1264	1212	1436	1420	1036	1296	1420	1252	1128	1284	1440	1084
PE(P-16:0_20:1)	GP	PE-P	729.567241	[M+H]+	C41H80NO7P	5.28	10.112	7.216	7.2	6.272	10.016	8	3.632	7.92	1.16	10.448	8.192	19.36	0.6496	17.44	11.376	2.912	5.056	2.976	4.592	7.712	2.272	2	9.552	8.864	3.504	8.288	2.768
PE(P-18:0_20:1)	GP	PE-P	757.598541	[M+H]+	C43H84NO7P	1.728	3.264	2.24	2.16	1.872	2.16	2.816	1.2528	1.92	1.5184	2.432	1.616	6.144	0.5328	11.52	3.168	1.5536	1.5648	0.7568	1.936	3.376	0.8816	1.168	3.232	2.208	1.824	2.72	0.6544
PE(P-15:0_18:2)	GP	PE-P	685.504641	[M+H]+	C38H72NO7P	4	7.328	4.096	3.856	1.3536	3.408	4.4	2.608	6.672	1.808	7.232	5.424	14.16	0.6944	6.848	20.64	2.464	2.608	1.1968	2.016	3.344	1.0544	2.208	3.904	6.432	2.416	4.576	1.904
PE(P-16:0_20:2)	GP	PE-P	727.551591	[M+H]+	C41H78NO7P	3.712	6.624	5.168	4.176	3.36	7.904	6.576	2.416	4.96	1.072	7.904	6.256	18.4	0.496	9.856	12.432	0.9968	2.832	1.776	2.592	3.344	1.1232	1.4416	6.432	4.736	1.712	3.872	1.4928
PE(P-18:0_18:2)	GP	PE-P	727.551591	[M+H]+	C41H78NO7P	3.472	4.672	4.128	4.72	1.5456	2.48	5.488	2.176	3.952	2.512	4.112	2.48	15.504	0.8608	20	12.256	2.496	2.16	0.6544	3.872	2.656	0.9792	1.56	2.912	4.096	1.904	3.84	1.856
PE(P-16:0_20:3)	GP	PE-P	725.535941	[M+H]+	C41H76NO7P	16.48	29.44	20.64	19.2	13.152	37.44	27.36	15.456	24.16	6.992	28.96	23.2	74.88	1.872	31.84	75.2	8.096	15.072	6.096	8.256	10.288	4.56	5.312	18.56	18.56	8.384	13.488	7.04
PE(P-16:0_22:4)	GP	PE-P	751.551591	[M+H]+	C43H78NO7P	89.12	141.76	119.84	109.6	143.52	211.2	104.8	108.64	138.88	33.28	159.52	114.88	308.8	11.904	252.8	289.6	29.44	124.48	58.08	132.48	49.44	40.96	70.88	91.04	104	48.8	73.28	55.84
PE(P-17:0_22:4)	GP	PE-P	765.567241	[M+H]+	C44H80NO7P	1.2	2.016	1.3776	1.3424	1.08	1.5104	0.8688	0.7984	1.1104	1.2976	1.2672	1.696	2.4	0.13488	3.648	2.736	0.7504	1.4256	0.6848	2.32	1.408	1.3568	2.24	1.68	1.664	1.1088	2.048	0.8896
PE(P-16:0_22:5)	GP	PE-P	749.535941	[M+H]+	C43H76NO7P	12.368	25.12	18.24	15.216	19.36	21.92	11.408	11.072	16	3.792	20.64	15.936	37.12	1.6	35.68	54.72	2.336	19.04	14.736	21.12	8.432	4.56	18.4	12.256	10.896	9.584	14.512	7.712
PE(P-18:1_22:4)	GP	PE-P	777.567241	[M+H]+	C45H80NO7P	1.744	3.072	2.416	2.256	1.1376	3.76	1.1232	1.4064	0.9344	1.1424	1.4992	3.408	5.808	0.328	4.208	6.784	0.8144	3.536	2.96	4.112	1.3456	1.744	4.4	1.968	3.232	1.5408	2.944	1.968
PE(P-14:0_22:6)	GP	PE-P	719.488991	[M+H]+	C41H70NO7P	1.16	1.4272	1.4336	1.5088	0.8336	0.7488	1.552	1.1392	2.32	1.68	1.712	2.528	2.976	0.08048	1.84	7.28	0.3808	0.6944	1.328	2.976	1.744	0.744	2.096	1.4496	1.2016	0.4352	1.0256	0.4304
PE(P-18:2_20:4)	GP	PE-P	747.520291	[M+H]+	C43H74NO7P	2.656	5.44	3.152	3.68	1.32	8.72	1.304	2.368	1.5952	1.696	4.48	7.616	4.768	0.012928	2.864	12.464	1.4192	3.344	1.76	3.632	2.32	1.384	8.32	3.008	7.584	2.256	4.592	2.16
DG(12:0_16:1)	GL	DG	510.428425	[M+NH4]+	C31H58O5	175.68	146.88	345.6	210.24	178.88	486.4	355.2	124.16	277.12	142.4	240.64	151.36	118.4	422.4	103.68	191.04	232.96	160.96	144	268.8	400	234.24	336	135.04	185.6	164.8	80	153.28
DG(16:2_18:2)	GL	DG	588.475375	[M+NH4]+	C37H64O5	158.08	101.44	489.6	425.6	540.8	560	201.92	448	323.2	58.56	406.4	115.2	368	145.28	22.112	103.04	374.4	274.56	464	329.6	168.64	691.2	419.2	87.68	183.04	83.2	109.44	181.44
Cer(t17:0/24:0(2OH))	SP	Cert	669.627124	[M+H]+	C41H83NO5	0.6032	0.2432	1.12	0.4024	0.4064	1.248	0.3584	0.7416	1.04	1.12	0.4184	1.824	0.4304	0.4232	3.584	0.592	0.3336	1.184	1.448	0.6208	0.408	0.432	0.856	1.2	0.388	0.7376	0.5864	0.5504
Cer(t18:0/16:0(2OH))	SP	Cert	571.517574	[M+H]+	C34H69NO5	2	1.496	5.4	2.4	0.1952	2.648	0.256	0.4336	3.784	0.404	0.4696	2.632	0.5856	0.0952	4.176	0.3088	4.456	4.44	8.96	6.168	2.92	3.792	6.408	19.28	1.56	7.696	7.616	1.704
Cer(t18:0/24:0(2OH))	SP	Cert	683.642774	[M+H]+	C42H85NO5	0.92	0.3504	0.928	1.064	0.796	1.616	0.944	1.408	3.288	1.552	0.816	3.712	0.4304	0.552	5.16	1.208	0.848	1.704	3.04	1.208	0.6872	0.796	1.848	2.416	0.816	1.088	1.744	1.112
Cer(t18:0/25:0(2OH))	SP	Cert	697.658424	[M+H]+	C43H87NO5	0.1664	0.2392	0.6336	0.3072	0.4696	0.6832	0.2168	0.3992	1.16	0.848	0.1136	1.936	0.3776	0.2552	2.16	0.22	0.228	0.824	0.912	0.2136	0.1784	0.2664	0.788	0.5888	0.4504	0.3952	0.3024	0.2992
Cer(t20:0/24:0(2OH))	SP	Cert	711.674074	[M+H]+	C44H89NO5	0.6624	0.66	1.632	0.6576	0.6272	1.664	0.6248	1.16	2.128	1.288	0.5296	4.152	0.4616	0.5488	4.04	0.792	0.5184	1.384	1.912	1.048	0.6216	0.824	2.256	1.4	0.4816	1.28	0.808	0.452
LPE(15:0)	GP	LPE	439.269891	[M+H]+	C20H42NO7P	6.384	7.888	6.128	8.4	6.72	6.432	8.656	7.12	7.344	8.016	8.224	7.584	7.184	7.216	7.792	5.776	9.2	8.8	6.816	9.52	7.008	7.648	7.808	7.28	7.632	7.952	7.28	7.488
Cer(t17:0/26:0)	SP	Cert	681.663509	[M+H]+	C43H87NO4	0.3184	0.1304	0.856	0.5144	0.2664	0.5624	0.54	0.2328	0.92	0.772	0.2856	2.264	0.5064	0.1152	1.832	0.5112	0.1456	0.6392	1.288	0.4584	0.2008	0.4112	0.5864	0.604	0.2568	0.368	0.7704	0.1912
Cer(t18:0/22:0)	SP	Cert	639.616559	[M+H]+	C40H81NO4	0.784	0.4624	1.016	0.6992	0.4904	1.976	0.608	0.5168	2.504	0.472	0.88	0.928	0.5112	0.1648	2.448	1.424	0.6808	0.912	1.24	0.6312	0.32	0.5152	0.7288	1.672	0.34	0.6888	0.888	0.4128
Cer(t18:0/24:0)	SP	Cert	667.647859	[M+H]+	C42H85NO4	1.984	0.7752	2.352	1.864	1.056	3.248	1.064	1.928	4.632	2.656	1.624	4.616	1.12	0.952	4.688	1.464	0.7456	2.568	3.952	1.208	0.6768	1.008	3.248	3.232	0.912	1.736	1.688	1.2
Cer(d18:1/16:0(2OH))	SP	Cer	553.507009	[M+H]+	C34H67NO4	9.44	2.096	4.768	2.56	1.376	4.072	9.52	1.464	2.536	5.936	1.832	3.392	1.808	6.088	1.256	1.632	17.76	1.904	2.392	5.432	5.72	11.28	11.52	10.24	9.28	3.896	5.712	5.448
Cer(d18:1/18:0(2OH))	SP	Cer	581.538309	[M+H]+	C36H71NO4	5.976	16.24	25.76	11.68	8.16	9.44	2.472	0.88	4.448	0.648	7.904	4.504	6.096	0.3216	4.016	13.76	11.28	15.52	16.24	9.36	11.36	11.52	32.08	12.48	8.24	10.56	9.84	4.104
SM(d18:2/24:2)	SP	SM	808.645825	[M+H]+	C47H89N2O6P	1.824	4.16	2.24	4.336	5.216	8.48	2.496	0.8688	1.856	0.4624	9.136	4.576	9.056	0.12064	0.5312	4.608	2.496	12.256	1.5776	7.376	0.6192	3.936	1.68	1.616	3.216	5.136	1.776	5.2
DG(O-16:0_12:0)	GL	DG-O	498.46481	[M+NH4]+	C31H62O4	24.544	20.064	51.2	26.208	27.648	70.4	46.4	22.208	30.368	23.008	22.4	15.136	18.976	64	16.128	30.976	19.072	18.72	20.32	34.24	77.12	46.08	34.88	35.52	28.384	28.256	11.232	19.808
DG(O-19:0_16:0)	GL	DG-O	596.57436	[M+NH4]+	C38H76O4	9344	28768	46400	28832	40000	85120	46720	20704	22688	34240	25184	23552	12448	41600	24576	47680	30496	20256	30848	44160	67520	35520	60160	29280	15744	49600	26240	31456
DG(O-21:0_16:0)	GL	DG-O	624.60566	[M+NH4]+	C40H80O4	384	203.2	1024	320	314.88	377.6	857.6	282.56	220.8	163.84	262.4	84.16	132.8	457.6	569.6	315.2	261.12	428.8	212.16	208	345.6	595.2	1283.2	184.64	582.4	358.4	117.12	232.64
DG(O-18:0_20:1)	GL	DG-O	636.60566	[M+NH4]+	C41H80O4	53.76	72.96	110.08	110.72	65.6	307.52	153.6	66.56	64.64	64	111.04	65.92	27.36	87.36	47.36	89.6	76.16	48.96	74.88	103.36	198.4	144.64	149.76	57.28	99.52	110.08	44.16	54.72
DG(O-17:0_22:1)	GL	DG-O	650.62131	[M+NH4]+	C42H82O4	63.04	53.76	128.32	73.92	67.84	234.88	197.12	48.32	32.64	53.76	47.04	47.04	35.52	168.32	33.92	83.52	80.64	50.88	64.96	130.56	128.32	126.72	177.28	47.04	72.96	70.4	41.28	48.64
DG(O-20:0_18:2)	GL	DG-O	634.59001	[M+NH4]+	C41H78O4	13.408	15.136	23.136	20.64	11.232	8.928	18.624	18.304	17.056	10.176	24.512	8.384	8.416	13.12	8.256	22.24	22.176	4.128	12.608	34.56	50.24	28	27.968	10.464	13.248	13.472	9.472	12.48
MGDG(14:0_18:0)	GL	MGDG	730.5595	[M+NH4]+	C41H78O10	21.28	15.36	44	22.88	24.32	86.88	28.16	17.12	22.56	24.32	22.08	17.44	16.96	67.2	8.896	36	15.872	21.76	22.88	27.2	29.92	33.76	39.04	13.984	13.024	13.664	7.696	28.48
MGDG(16:0_20:4)	GL	MGDG	778.5595	[M+NH4]+	C45H78O10	158.4	104.96	199.36	153.28	141.76	720	201.28	50.88	127.36	2.8832	166.4	91.52	149.44	5.184	82.88	196.16	90.88	69.12	55.04	84.8	63.68	107.52	45.44	87.68	73.6	95.04	100.16	46.08
DGDG(14:0_20:5)	GL	DGDG	910.565375	[M+NH4]+	C49H82O15	55.04	69.76	132.8	87.68	36.16	130.24	80.64	24.672	72.32	91.2	51.2	17.472	29.984	61.76	17.664	72	62.72	20.896	46.72	142.08	128	98.24	161.92	23.072	51.52	35.84	166.08	515.2
LPC(16:2)	GP	LPC	491.301191	[M+H]+	C24H46NO7P	2.976	2.864	2.96	3.584	1.728	1.4576	1.5584	1.4256	1.4368	1.5984	1.4784	2.064	2.528	1.2944	1.3664	1.5856	3.136	2.144	2.896	3.12	2.768	3.84	19.2	2.032	2.56	1.4848	5.568	6.64
LPC(16:4)	GP	LPC	487.269891	[M+H]+	C24H42NO7P	1.776	1.92	1.824	2.336	2.272	2.24	2.48	2.128	3.12	6.384	2.752	2.64	3.536	4.688	2.336	2.672	2.672	3.072	2.144	2.848	2.192	2.464	2.928	2.464	2.512	2.432	2.256	2.352
(±)15-HETE	FA	Eicosanoid	320.2351	[M-H]-	C20H32O3	451.2	470.4	412.8	464	125.44	34.24	109.12	246.4	135.04	14.176	94.4	79.68	110.4	N/A	88.32	149.44	1843.2	448	848	780.8	1017.6	633.6	534.4	1408	400	665.6	448	576
TxB3	FA	Eicosanoid	368.2198888	[M-H]-	C20H32O6	82.24	64	65.92	55.68	68.8	81.92	50.24	35.2	50.24	50.24	114.56	95.04	84.8	N/A	31.296	110.72	164.48	80	45.76	58.56	71.36	41.92	48.96	60.16	50.24	203.52	53.12	56.32
PC(14:0_18:2)	GP	PC	729.530856	[M+COOH]-	C40H76NO8P	8.288	17.184	13.472	10.496	16.672	13.344	15.744	16.64	18.656	N/A	12.832	17.6	23.808	6.752	11.2	27.616	12.544	10.208	14.464	9.6	19.552	12.992	11.136	6.368	11.744	7.232	13.632	13.312
PC(16:0_18:3)	GP	PC	755.546506	[M+COOH]-	C42H78NO8P	12.032	11.056	19.04	20.8	34.72	48.64	29.92	19.36	16.8	1.016	26.72	17.92	14.256	N/A	29.12	25.6	10.688	12.608	8.416	12.288	13.376	9.792	24	10.384	8.688	17.12	14.16	5.232
PC(18:2_18:2)	GP	PC	781.562156	[M+COOH]-	C44H80NO8P	44	38.08	41.12	36.32	17.12	30.72	40.48	33.76	78.56	2.992	47.04	24.8	230.4	7.184	69.6	382.4	3.968	16.48	4.256	13.216	3.744	3.904	7.728	N/A	34.72	11.04	10.368	12.24
PC(18:0_22:4)	GP	PC	837.624756	[M+COOH]-	C48H88NO8P	28	20.48	40	33.44	44.96	48.16	39.04	30.56	32	N/A	39.36	13.728	67.04	2.4	41.92	87.04	13.36	32.16	28	53.44	16.32	9.696	6	14.992	16.8	27.04	13.744	11.44
PC(16:0_22:6)	GP	PC	805.562156	[M+COOH]-	C46H80NO8P	17.92	17.28	22.72	13.072	27.68	21.92	10.208	22.24	7.072	N/A	15.872	13.136	26.08	1.5648	14.032	42.56	4.528	36.64	23.2	14.288	15.2	6.448	2.784	7.92	8.608	21.28	13.28	6.88
PC(20:4_20:4)	GP	PC	829.562156	[M+COOH]-	C48H80NO8P	22.08	12.432	10.528	11.6	12.16	22.72	5.152	6.336	5.264	N/A	7.344	18.24	6.608	2.144	2.096	9.984	9.696	24	23.2	28.64	9.2	7.296	18.72	7.696	15.552	3.376	8.192	13.728
PE(16:0_18:1)	GP	PE	717.530856	[M-H]-	C39H76NO8P	3.232	3.616	2.928	3.696	6.16	11.056	3.152	3.744	2.272	1.0656	10.192	6.848	4.24	N/A	3.84	11.504	2.624	3.392	2.304	2.08	1.952	1.76	1.5536	3.808	1.648	2.656	2.448	1.856
PE(17:0_20:4)	GP	PE	753.530856	[M-H]-	C42H76NO8P	18.88	16.8	17.92	24.64	17.28	42.24	11.056	9.248	7.712	N/A	20.96	18.88	24.32	0.6624	22.72	29.44	11.072	32.48	36.48	46.72	25.76	23.84	28.16	34.24	13.504	22.4	22.4	13.776
PS(18:0_18:1)	GP	PS	789.551986	[M-H]-	C42H80NO10P	139.52	170.56	152	134.72	213.76	269.12	107.52	115.84	134.4	N/A	352	315.52	164.8	7.968	200.32	361.6	119.36	120.32	150.08	109.12	131.52	92.8	62.08	252.48	104	120	81.92	51.2
PS(18:0_20:3)	GP	PS	813.551986	[M-H]-	C44H80NO10P	55.68	68.48	84.48	55.68	74.88	78.4	113.92	65.92	52.8	134.08	93.12	69.44	89.6	205.76	67.84	N/A	101.12	67.52	83.2	78.08	107.2	95.36	108.48	87.04	63.04	53.76	50.24	88.96
PS(18:0_20:4)	GP	PS	811.536336	[M-H]-	C44H78NO10P	336	276.48	384	254.72	292.48	1324.8	316.48	132.48	134.72	28.512	521.6	279.04	697.6	N/A	181.12	681.6	355.2	492.8	323.2	355.2	457.6	409.6	262.4	633.6	329.6	422.4	374.4	254.4
PS(22:4_18:0)	GP	PS	839.567636	[M-H]-	C46H82NO10P	77.76	80	73.6	90.88	48.96	192.32	82.88	62.72	62.72	38.4	93.12	102.72	168.64	N/A	65.92	265.28	66.88	94.4	134.72	138.56	45.76	67.84	119.36	99.84	65.6	110.08	75.2	85.12
PE(O-18:1_16:0)	GP	PE-O	703.551591	[M-H]-	C39H78NO7P	1.5168	1.4224	1.744	1.632	1.5664	1.888	0.232	0.6096	0.8096	0.1888	0.9952	0.8464	0.9296	N/A	1.3216	2.112	3.424	1.824	0.9408	1.3216	2.24	1.984	1.5216	8	0.6416	1.5008	1.0832	0.3824
PE(O-16:1_16:1)	GP	PE-O	673.504641	[M-H]-	C37H72NO7P	15.36	13.792	13.856	17.28	33.44	72.64	16.8	16.96	21.6	N/A	36.16	21.6	26.4	1.0336	9.552	33.12	5.616	15.36	10	3.744	3.344	4.432	2.752	13.376	3.632	7.936	7.296	5.52
PE(O-18:1_18:1)	GP	PE-O	729.567241	[M-H]-	C41H80NO7P	8.272	8.416	8.416	7.84	14.064	15.008	8.144	7.84	6.752	N/A	13.68	5.632	21.92	0.9344	24.48	20.16	5.76	9.232	4.704	2.208	4.928	3.424	2.848	11.92	3.968	3.568	6.976	3.472
PE(O-18:2_18:1)	GP	PE-O	727.551591	[M-H]-	C41H78NO7P	2.544	2.032	2.64	2.896	4.144	6.048	2.48	2.592	1.744	0.2832	6.128	4.8	7.024	N/A	2.944	7.696	1.3136	2.416	1.4704	0.5488	1.0096	0.5792	0.6352	2.576	1.3856	0.752	1.872	1.4624
PE(O-18:2_18:2)	GP	PE-O	725.535941	[M-H]-	C41H76NO7P	3.536	4.176	3.504	5.824	1.496	5.088	2.576	4.384	3.296	N/A	7.424	4.736	15.296	0.704	8.208	22.08	0.9952	2.32	1.3584	0.8176	1.4064	0.6784	1.2992	1.808	2.464	1.32	1.2656	1.1312
PC(15:0_18:1)	GP	PC	745.5621555	[M+COOH]-	C41H80NO8P	13.6	14.112	16.64	14.768	15.024	8.288	5.888	13.456	9.024	7.664	20.96	22.72	10.928	N/A	13.376	21.28	13.104	11.824	15.168	16.16	18.56	16	8.896	17.76	20.64	18.56	21.6	12.64
LNAPE(16:0/N-18:1)	GP	LNAPE	717.530856	[M-H]-	C39H76NO8P	3.376	3.216	2.704	3.056	2.528	6.432	2.048	2.576	1.936	0.792	5.168	4.848	2.32	1.064	2.528	8.064	1.76	2.16	1.968	1.2576	1.872	1.76	N/A	2.816	1.92	1.5712	1.3552	1.5344
CarnitineC12:0	FA	CAR	343.272259	[M+H]+	C19H37NO4	0.14144	0.11232	0.1424	0.1056	0.07648	0.2128	0.18848	0.07008	0.1872	1.3984	0.0736	0.07584	0.25248	N/A	0.13376	0.12608	0.1072	0.13856	0.20224	0.2912	0.07008	0.14592	0.23008	0.13696	0.31264	0.07904	0.26688	0.12192
CarnitineC4:1-2OH	FA	CAR	261.121239	[M+H]+	C11H19NO6	0.0512	0.05344	0.05568	0.0688	0.08832	0.09344	0.05888	0.088	N/A	0.29472	0.07072	0.07232	0.18624	0.3616	0.09664	0.14464	0.07936	0.07104	0.04832	0.05728	0.05536	0.072	0.13856	0.0752	0.07072	0.07968	0.0864	0.08864
Cer(d18:1/16:0)	SP	Cer	537.512094	[M+H]+	C34H67NO3	72.16	72	79.68	26.88	36.64	30.4	53.2	4.512	37.84	1.608	13.84	18.16	20.8	N/A	25.12	37.12	104.8	42.8	46.32	38.96	92.8	58.16	199.2	95.2	52.48	25.68	30.32	31.76
Cer(d18:1/23:0)	SP	Cer	635.621644	[M+H]+	C41H81NO3	0.608	1.624	2.632	3.192	1.008	0.5728	1.04	0.944	1.872	1.376	1.28	3.96	0.7384	0.284	1.44	2.744	2.136	0.3032	1.928	2.6	N/A	2.264	5.704	1.432	0.832	1.744	3.088	0.756
Cer(d18:1/24:0)	SP	Cer	649.637294	[M+H]+	C42H83NO3	7.6	1.464	4	6.136	1.376	20.96	4.368	1.792	N/A	1.328	8.48	27.2	1.008	1.6	11.84	6.96	5	6.36	18.8	3.336	2.232	4.264	22.08	7.472	2.896	4.704	3.928	1.048
Cer(d18:1/24:1)	SP	Cer	647.621644	[M+H]+	C42H81NO3	6.512	2.8	15.76	6.624	0.968	10.56	0.904	0.6232	3.12	0.2464	3.064	20.08	0.6976	N/A	6.28	2.544	6.336	12.48	29.36	11.68	2.752	5.96	36.32	32.08	2.832	16.16	5.008	2.664
Cer(d18:2/16:0)	SP	Cer	535.496444	[M+H]+	C34H65NO3	4.304	1.992	1.392	3.44	1.392	1.336	2.184	0.07792	0.2504	N/A	2.28	0.4584	0.5112	0.0872	0.888	0.7032	2.472	3.48	1.992	1.28	7.712	2.288	2.544	9.36	8.16	7.456	2.296	2.48
DG(16:0_20:4)	GL	DG	616.506675	[M+NH4]+	C39H68O5	58.56	50.24	164.16	51.52	100.16	320	64	64	44.16	N/A	60.48	55.36	40.64	7.488	38.4	231.68	41.28	67.84	96.96	42.24	62.08	24.832	56	33.92	48.96	57.6	19.968	19.136
DG(18:0_22:4)	GL	DG	672.569275	[M+NH4]+	C43H76O5	37.76	48.32	114.24	52.48	69.12	156.8	63.04	31.904	48	N/A	92.8	46.4	27.296	25.184	20.864	221.76	47.04	51.52	32.32	79.68	66.88	32.96	90.88	59.84	33.28	58.88	13.568	32
HexCer(d18:1/17:0)	SP	HexCer	713.580569	[M+H]+	C41H79NO8	2.2336	2.992	2.1632	1.8624	0.4192	2.2944	1.2064	0.7584	2.3456	0.27488	2.5312	2.9248	4.096	0.05024	1.3888	2.0384	5.184	3.0688	2.1408	2.1472	2.1984	11.552	13.184	4.384	1.5744	N/A	1.6416	0.5856
HexCer(d18:1/18:1)	SP	HexCer	725.580569	[M+H]+	C42H79NO8	6.112	6.496	7.328	6.112	2.8032	8.32	1.4144	1.1104	2.5216	N/A	6.176	3.584	1.3856	0.4768	0.592	3.456	5.12	10.624	10.432	7.808	3.904	10.112	37.44	14.816	4.384	3.0112	3.424	2.9408
HexCer(d18:1/22:1)	SP	HexCer	781.643169	[M+H]+	C46H87NO8	12.064	11.552	19.072	12.32	5.504	10.08	3.456	2.4064	4.672	N/A	9.792	10.176	8.928	0.3552	5.504	7.072	16.512	13.92	11.008	17.568	12	22.4	122.24	29.952	9.28	4.864	7.744	4.224
LPC(14:0)	GP	LPC	467.301191	[M+H]+	C22H46NO7P	0.7152	0.968	1.2208	0.8224	0.5856	0.9792	0.3488	0.6208	0.3616	11.68	0.8272	0.696	0.8672	N/A	0.3488	1.0896	1.144	0.5968	1.4624	3.36	1.3616	1.3968	5.088	1.032	0.7584	0.7792	1.28	1.2
LPC(0:0/16:0)	GP	LPC	495.332491	[M+H]+	C24H50NO7P	0.9856	1.248	1.0272	1.2128	0.4416	0.5408	0.4336	N/A	0.3664	1.0032	0.3712	0.7232	0.3216	0.3696	0.3776	0.456	1.4	1.1968	1.3984	2.288	1.2256	2.512	3.664	1.2544	1.1168	1.0816	1.6	1.824
LPC(16:0/0:0)	GP	LPC	495.332491	[M+H]+	C24H50NO7P	0.5488	0.5968	0.4784	0.44	0.52	0.7968	0.2992	0.2432	0.232	1.1744	0.8224	0.544	0.5888	N/A	0.3312	0.944	0.5568	0.8688	1.008	1.632	0.6032	0.4176	0.952	0.5488	0.5248	0.4128	0.968	0.3824
LPC(19:0/0:0)	GP	LPC	537.379441	[M+H]+	C27H56NO7P	0.7504	0.712	0.7904	0.7856	0.2992	0.272	0.2592	0.208	0.248	0.15152	0.936	0.5856	0.4448	N/A	0.2896	0.816	1.2112	0.6448	0.8704	1.728	1.904	1.5328	0.9056	1.4096	0.824	0.8736	0.9472	0.7328
LPC(18:3)	GP	LPC	517.316841	[M+H]+	C26H48NO7P	0.3808	0.3536	0.3664	0.2384	0.1696	0.2144	0.3392	0.10832	0.09408	0.2656	0.1936	0.10992	0.2976	N/A	0.07536	0.2336	0.488	0.15072	0.1728	0.4512	0.24	0.2848	2.384	0.10544	0.24	0.2384	0.5184	0.8256
LPC(20:4)	GP	LPC	543.332491	[M+H]+	C28H50NO7P	0.14672	0.1616	0.1576	0.1776	0.04496	0.2512	0.13392	0.05168	0.04928	0.13264	0.10112	0.10464	0.1808	N/A	0.05552	0.232	0.2272	0.2416	0.2688	0.3216	0.1296	0.1064	0.3472	0.13568	0.13856	0.2336	0.14144	0.1616
PC(16:0_14:0)	GP	PC	705.530856	[M+H]+	C38H76NO8P	3.176	1.888	2.776	3.72	2.688	5.656	1.96	0.936	1.632	N/A	5.328	4.56	1.92	0.2056	2.176	4.16	4.304	2.712	2.968	2.488	4.072	2.984	3.288	3.328	2.152	4.584	2.328	1.024
PC(18:0_20:4)	GP	PC	809.593456	[M+H]+	C46H84NO8P	3.584	2.616	3.512	4.392	4.512	10.16	3.488	2.88	3.72	N/A	4.456	2.128	5.2	0.3464	5.104	6.608	3.392	7.808	4.48	4.208	3.296	2.12	1.448	2.296	2.056	3.36	2.408	2.344
PC(14:0_22:6)	GP	PC	777.530856	[M+H]+	C44H76NO8P	16	12.24	19.28	20.4	22.96	20.32	14.88	17.68	14.16	4.352	36.8	42.24	33.04	N/A	20.48	63.12	6.776	25.76	13.92	20.72	15.12	11.52	19.36	7.152	12.48	13.92	13.2	10.64
PC(O-18:0_20:3)	GP	PC-O	797.629841	[M+H]+	C46H88NO7P	2.896	2.176	3.04	3.584	4.672	6.624	1.1872	1.68	2.112	N/A	3.904	1.4272	4.992	0.15008	11.024	3.36	1.392	4.592	3.008	5.408	2.544	3.696	2.528	4.032	1.952	2.752	2.048	2.384
PC(O-22:2_20:4)	GP	PC-O	847.645491	[M+H]+	C50H90NO7P	0.4624	0.3776	0.4528	0.624	0.4016	0.2048	0.3968	0.3824	0.4448	N/A	0.736	0.576	0.6976	0.06832	0.5872	1.2656	0.2864	1.3552	0.5936	1.0224	0.8464	0.5024	0.3312	0.5072	0.5456	0.4832	0.3104	0.4096
PC(O-16:1_22:6)	GP	PC-O	789.567241	[M+H]+	C46H80NO7P	24.16	20	21.6	26.56	17.6	32.16	15.488	14.352	14.992	N/A	23.84	16.32	56.32	3.328	37.44	31.52	16.96	43.04	24.64	32.32	25.28	27.2	19.2	36.16	17.6	19.04	17.76	16.64
PE(P-16:0_16:1)	GP	PE-P	673.504641	[M+H]+	C37H72NO7P	9.04	12.72	11.088	12.256	20.64	47.36	9.616	9.12	15.712	N/A	22.08	16.64	19.36	0.6704	8.512	22.24	4.576	11.312	6.4	5.168	4.72	2.768	3.664	8.144	3.632	6.704	7.76	2.64
PE(P-16:0_17:1)	GP	PE-P	687.520291	[M+H]+	C38H74NO7P	3.76	6.272	4.544	4.288	5.696	9.744	3.776	2.832	5.728	N/A	9.68	9.952	8.528	0.2592	3.984	10.64	2.592	5.024	1.632	1.856	4.928	2.384	2.16	4.72	3.168	3.264	3.328	1.5824
PE(P-18:1_18:1)	GP	PE-P	727.551591	[M+H]+	C41H78NO7P	1.2032	2.4	1.5712	1.5744	1.808	3.696	1.4576	1.2448	1.3856	1.5424	4.144	2.96	3.376	N/A	3.216	4.944	0.4848	2.048	0.8704	1.968	0.568	0.496	0.5504	2.208	1.152	0.7744	2.16	0.6848
PE(P-18:1_18:2)	GP	PE-P	725.535941	[M+H]+	C41H76NO7P	0.7776	2.528	1.288	1.4352	0.6192	1.5408	0.8608	0.8208	1.3552	1.072	2.432	2.016	4.688	N/A	3.088	6.528	0.5648	0.8784	0.6944	1.3152	0.3808	0.2736	0.8752	0.9696	0.776	0.7552	1.1632	0.6896
PE(P-16:0_20:5)	GP	PE-P	721.504641	[M+H]+	C41H72NO7P	2.128	3.248	2.528	2.576	1.68	4.016	3.248	2.544	2.368	N/A	4.176	6.752	7.248	0.2848	4.288	5.84	0.6912	1.968	0.9584	2.592	0.7344	0.896	2.368	2.08	2.032	1.416	1.984	0.8992
SM(d18:0/16:0)	SP	SM	704.583225	[M+H]+	C39H81N2O6P	0.7888	0.856	0.9264	0.7696	0.8416	1.432	0.2816	0.2832	0.2848	N/A	1.4208	1.3584	0.5424	0.04864	0.5488	1.2528	0.8192	0.6032	1.0336	0.608	0.9568	0.5936	0.7968	1.3088	0.384	1.0464	0.672	0.328
SM(d18:0/17:0)	SP	SM	718.598875	[M+H]+	C40H83N2O6P	3.52	2.944	3.424	3.296	1.968	3.808	1.0704	0.8784	1.648	N/A	3.2	3.248	2.928	0.04624	3.056	3.184	1.984	2.912	3.392	2.528	4.144	5.232	4.144	5.216	1.264	3.072	2.528	2
PE(P-16:0_22:3)	GP	PE-P	753.567241	[M+H]+	C43H80NO7P	1.2208	1.888	1.632	1.664	1.4528	1.744	1.744	1.12	2.432	N/A	2.672	1.4704	4.608	0.24	5.376	4.48	0.312	0.5312	0.3744	0.4784	0.6608	0.1792	0.4288	0.9312	0.984	0.5616	0.9488	0.352
PE(P-14:0_20:4)	GP	PE-P	695.488991	[M+H]+	C39H70NO7P	1.824	4.48	2.368	3.008	1.76	6.336	3.232	1.952	2.896	N/A	5.408	4.56	5.872	0.2288	1.92	11.04	1.2176	2.448	1.4176	5.056	3.152	1.5376	2.528	2.848	4.464	1.904	4.016	1.0848
PE(P-18:2_20:2)	GP	PE-P	751.551591	[M+H]+	C43H78NO7P	1.576	2.768	1.968	2.112	3.52	2.896	2.08	1.5536	3.248	N/A	2.848	2.304	3.984	0.248	2.528	3.696	0.8512	1.5904	1.712	1.792	1.648	0.9648	1.2992	1.808	1.728	0.864	1.3184	1.2272
PE(P-19:0_20:4)	GP	PE-P	765.567241	[M+H]+	C44H80NO7P	0.48	1.0704	0.5904	0.6608	0.432	0.9376	0.616	0.2848	0.4272	1.0752	1.04	0.8384	0.9744	N/A	0.624	1.168	0.5312	0.7104	0.3712	1.0016	1.544	0.8944	1.728	1.184	1.1664	0.9424	1.872	0.6592
PE(P-16:0_24:4)	GP	PE-P	779.582891	[M+H]+	C45H82NO7P	4.048	7.232	4.64	5.152	3.104	18.4	9.168	3.216	4.48	2.896	9.888	11.504	9.888	N/A	4.64	14.224	2.784	3.376	1.904	3.28	5.296	1.616	1.632	5.936	2.624	3.632	3.76	1.744
PE(P-16:1_20:4)	GP	PE-P	721.504641	[M+H]+	C41H72NO7P	1.0016	1.984	1.5328	1.5744	0.4944	2.288	1.592	0.9392	1.984	N/A	1.1792	4.144	4.592	0.06736	1.5472	8.096	0.864	0.9136	0.672	1.2336	1.0112	0.2112	1.5392	0.8864	1.632	0.7392	2.192	0.688
PE(P-16:0_24:5)	GP	PE-P	777.567241	[M+H]+	C45H80NO7P	0.7088	1.1248	0.816	0.9312	0.6544	2.752	0.7936	0.6272	1.0768	N/A	0.648	2.096	1.0464	0.10512	0.2832	0.7808	0.4496	0.5152	0.6592	0.7088	0.744	0.4896	0.7904	0.7648	0.896	0.6192	0.3568	0.3728
PE(P-17:0_22:6)	GP	PE-P	761.535941	[M+H]+	C44H76NO7P	2	3.984	2.56	2.512	1.68	2.528	0.7424	1.528	1.5744	N/A	1.4848	4.624	3.552	0.2	3.376	5.52	1.2464	3.12	2.368	2.928	3.984	2.624	6.208	4.72	2.8	1.872	3.376	1.92
PE(P-18:2_22:5)	GP	PE-P	773.535941	[M+H]+	C45H76NO7P	1.24	1.936	1.808	1.3184	0.6352	1.856	0.5376	1.3616	1.5664	N/A	0.9664	2.112	3.136	0.3568	1.0368	4.064	0.6048	1.4256	1.856	2.032	1.5936	1.28	5.696	1.28	2.112	0.6528	2.192	1.1024
DG(20:0_22:1)	GL	DG	706.647525	[M+NH4]+	C45H86O5	15.808	16.064	15.968	12.128	19.2	44.16	19.52	7.296	0.7072	19.584	18.72	16.288	N/A	13.6	8.416	18.848	18.592	10.752	13.056	40.32	37.12	7.456	34.56	25.952	19.488	22.272	14.048	14.976
Cer(t18:0/16:0)	SP	Cert	555.522659	[M+H]+	C34H69NO4	6.088	3.48	11.04	5.728	4.456	15.76	5.128	4.968	24.24	N/A	10.16	12.4	6.328	0.816	45.04	14.64	11.68	6.496	15.28	6	2.464	4.632	9.6	16.72	1.648	6.856	5.384	2.12
Cer(t18:0/26:0)	SP	Cert	695.679159	[M+H]+	C44H89NO4	0.6768	0.712	1.12	0.6768	0.4872	N/A	0.7648	0.6576	1.224	1.52	0.888	3.6	0.116	0.6712	4.248	0.5568	0.6296	1.696	1.688	0.736	0.3624	0.4304	1.36	1.088	0.548	0.6848	0.6136	0.4008
Cer(t18:0/24:1)	SP	Cert	665.632209	[M+H]+	C42H83NO4	0.7816	0.4808	2	0.468	0.2704	1.76	0.3128	0.152	1.104	0.5464	0.2504	2.392	0.07728	N/A	2.448	0.5584	0.6328	1.368	2.624	0.4928	0.4456	0.568	2.36	1.768	0.3496	0.88	0.7296	0.244
13-oxoODE	FA	Eicosanoid	294.2194948	[M-H]-	C18H30O3	470.4	435.2	387.2	454.4	190.08	288.96	100.16	142.72	107.2	N/A	860.8	483.2	215.36	N/A	230.08	691.2	1356.8	732.8	210.24	154.88	464	441.6	311.36	844.8	467.2	691.2	444.8	499.2
12,13-EpOME	FA	Eicosanoid	296.2351449	[M-H]-	C18H32O3	1036.8	1027.2	1030.4	1052.8	496	822.4	236.8	323.2	380.8	N/A	2368	1302.4	745.6	N/A	678.4	1590.4	2534.4	1267.2	742.4	540.8	1219.2	1452.8	937.6	1705.6	1244.8	1270.4	1062.4	1206.4
(±)12-HEPE	FA	Eicosanoid	318.2194948	[M-H]-	C20H30O3	57.6	74.88	69.12	64	51.84	27.52	73.28	39.04	43.2	N/A	65.6	119.36	112.32	N/A	23.232	46.4	222.08	84.48	130.56	87.36	107.2	114.88	114.56	146.24	89.28	95.04	83.2	112
11(S)-HETE	FA	Eicosanoid	320.2351449	[M-H]-	C20H32O3	889.6	985.6	969.6	918.4	377.6	280.64	142.72	287.04	152.32	N/A	342.4	390.4	149.12	N/A	72	240.32	4128	937.6	1504	1664	2387.2	969.6	902.4	3164.8	796.8	1376	745.6	995.2
14(S)-HDHA	FA	Eicosanoid	344.2351	[M-H]-	C22H32O3	243.2	272.96	270.72	278.4	109.76	28.032	83.2	159.36	137.6	N/A	84.48	162.24	152	N/A	102.08	85.44	668.8	192.32	579.2	339.2	518.4	422.4	387.2	675.2	368	239.36	412.8	531.2
LXB4	FA	Eicosanoid	352.2249741	[M-H]-	C20H32O5	1257.6	1216	1238.4	1206.4	656	665.6	1206.4	227.2	588.8	N/A	1776	1769.6	1049.6	N/A	206.72	460.8	6208	1212.8	1696	1209.6	1897.6	145.28	672	2496	739.2	2553.6	250.24	1324.8
FFA(20:1)	FA	FFA	310.28718	[M-H]-	C20H38O2	6.9408	4.8672	6.6144	5.7408	4.416	6.5664	8.0928	6.2112	15.744	11.136	4.608	3.4272	7.1712	5.3856	3.8208	10.176	4.272	8.3712	4.3776	4.2912	N/A	15.264	10.272	N/A	4.896	12.384	5.6544	9.408
PC(22:4_16:0)	GP	PC	809.593456	[M+COOH]-	C46H84NO8P	45.76	48.32	51.04	41.92	88.16	135.84	37.6	51.04	39.52	N/A	52.32	18.56	65.28	N/A	47.84	89.28	28.16	88.16	65.44	76.16	27.04	10.048	19.04	38.88	27.84	41.76	35.68	24.96
PC(18:1_20:4)	GP	PC	807.577806	[M+COOH]-	C46H82NO8P	50.08	64.8	83.36	60	81.92	158.24	68.32	96.32	59.36	N/A	94.24	92.16	138.24	N/A	63.68	211.2	24.32	87.36	65.76	70.72	30.08	19.04	29.12	22.72	35.84	42.56	38.88	37.28
PE(20:4_22:2)	GP	PE	819.577806	[M-H]-	C47H82NO8P	3.952	5.168	4.704	4.256	3.904	9.76	4	2.064	1.984	N/A	5.28	3.968	7.968	N/A	4.176	10.048	4.192	6.144	2.992	3.872	4.064	2.464	5.52	6.24	3.744	3.536	6.768	3.664
PI(16:0_20:4)	GP	PI	858.525832	[M-H]-	C45H79O13P	30.24	15.6	27.12	31.68	63.84	91.92	25.2	33.12	26.64	N/A	56.64	35.52	90	9.072	66.72	69.12	2.3472	40.56	11.28	8.856	4.056	N/A	12.24	3.768	6.456	13.512	6.816	3.864
PS(18:0_22:5)	GP	PS	837.551986	[M-H]-	C46H80NO10P	364.8	265.92	371.2	326.4	585.6	595.2	164.48	234.24	245.12	N/A	483.2	364.8	403.2	N/A	226.88	659.2	302.4	364.8	1046.4	464	598.4	342.4	441.6	480	203.84	329.6	221.44	258.88
PS(16:0_22:6)	GP	PS	807.505036	[M-H]-	C44H74NO10P	26.432	42.88	31.36	34.88	22.912	23.776	33.92	30.496	17.792	N/A	22.528	36.16	35.52	N/A	18.4	109.12	50.24	45.12	126.08	56.64	46.08	42.56	78.08	95.36	11.936	50.88	33.92	18.176
PE(O-18:1_18:0)	GP	PE-O	731.582891	[M-H]-	C41H82NO7P	1.0704	1.2544	1.0208	1.184	0.8128	1.264	0.376	0.3168	0.5888	N/A	0.7728	0.5872	0.576	N/A	0.6784	0.9376	3.104	1.312	0.664	0.9408	1.664	1.2192	0.9824	5.808	0.5184	1.2192	1.2016	0.4192
PE(O-16:0_18:2)	GP	PE-O	701.535941	[M-H]-	C39H76NO7P	3.152	2.88	3.632	3.056	3.136	6	4.352	3.344	4.48	N/A	6.976	3.872	10.224	0.9104	3.872	13.968	1.6	2.544	1.192	0.2992	0.9584	0.8	N/A	1.376	1.968	0.5664	1.408	1.416
PE(O-16:1_20:1)	GP	PE-O	729.567241	[M-H]-	C41H80NO7P	4	5.072	5.2	4.784	5.088	7.504	4.864	3.712	5.44	N/A	7.136	4.336	16.48	N/A	9.984	10.544	2.032	4.608	2.064	1.616	2.96	1.904	1.3248	6.528	2.864	1.1712	2.8	2.192
PE(O-18:1_20:1)	GP	PE-O	757.598541	[M-H]-	C43H84NO7P	1.3568	1.2592	1.2112	1.0864	1.5392	1.5872	1.1856	1.0336	0.9056	N/A	1.792	0.8848	4.08	N/A	5.104	1.824	0.9424	0.9008	0.48	0.32	1.1856	0.4992	0.5008	1.504	0.7712	0.408	0.8272	0.5168
PE(O-16:0_22:4)	GP	PE-O	753.567241	[M-H]-	C43H80NO7P	1.3952	1.2336	1.76	1.5888	3.088	9.728	0.64	0.7344	0.8304	N/A	1.92	2.704	1.76	N/A	1.968	2.88	0.5248	1.2992	1.792	1.808	0.6848	0.536	0.9584	1.696	0.7056	0.4992	1.1712	1.0752
PE(O-19:1_20:4)	GP	PE-O	765.567241	[M-H]-	C44H80NO7P	1.824	1.5584	1.696	2.144	0.8864	2.448	1.632	0.584	1.0576	N/A	2.144	1.632	3.84	N/A	1.0336	3.104	2	2.064	1.0416	1.248	1.824	1.888	2.384	3.088	1.4096	1.3792	2.432	1.872
PE(O-20:1_20:4)	GP	PE-O	779.582891	[M-H]-	C45H82NO7P	2.784	3.008	3.584	3.728	2.64	6.944	3.808	1.76	1.984	N/A	6.096	2.624	11.056	N/A	2.864	7.568	2.272	3.872	1.5072	2.112	1.808	2	2.736	3.04	2.032	1.152	3.84	2.416
PE(O-18:3_20:4)	GP	PE-O	747.520291	[M-H]-	C43H74NO7P	1.384	2.016	1.968	2.384	0.6368	6.672	1.104	1.952	0.8176	0.1872	4	4.064	4.8	N/A	2.272	8.256	2.16	2.48	2.576	1.4704	N/A	1.0368	3.456	3.008	3.184	0.5248	2.608	3.088
PE(O-17:1_22:6)	GP	PE-O	761.535941	[M-H]-	C44H76NO7P	2.72	2.592	2.048	4.416	2.88	4.944	1.872	1.0192	1.76	N/A	2.96	3.792	4.24	N/A	4.192	4.88	3.104	4.416	4.64	3.072	2.992	3.616	3.056	4.688	2.144	0.9904	1.68	2.496
PE(O-18:2_22:6)	GP	PE-O	773.535941	[M-H]-	C45H76NO7P	6.432	5.712	4.704	7.456	4.784	10.96	2.752	3.408	2.88	N/A	4.208	11.328	9.664	N/A	5.84	11.488	2.416	7.376	14.224	6.56	5.728	4.768	8.256	12.48	4.688	4.384	7.2	8.528
PMeOH(16:0_22:6)	GP	PMeOH	734.488657	[M-H]-	C42H71O8P	0.224	0.1824	0.2164	0.1636	0.1484	0.2276	0.01744	0.1444	0.2664	N/A	0.1892	0.0916	0.02308	N/A	0.1044	0.1664	0.2188	0.1372	0.1384	0.1788	0.17	0.1552	0.2092	0.1416	0.158	0.1868	0.276	0.154
Cer(d18:1/20:1)	SP	Cer	591.559044	[M+H]+	C38H73NO3	1.808	2.192	4.36	2.36	0.756	0.872	0.3504	0.2512	0.54	N/A	0.96	1.088	0.3176	N/A	0.1568	0.84	2.552	2.736	5.832	2.448	3.952	3.56	35.04	3.136	2.144	1.816	2.776	2.424
Cer(d18:1/22:1)	SP	Cer	619.590344	[M+H]+	C40H77NO3	2.912	4.528	5.616	4.032	1.864	2.632	1	0.864	1.488	N/A	2.296	3.04	1.584	N/A	1.264	4.84	5.208	3.752	7.816	4.208	8.16	6.824	42.16	5.672	3.432	5.024	3.528	2.712
Cer(d16:1/16:0)	SP	Cer	509.480794	[M+H]+	C32H63NO3	2.576	1.744	2.384	1.384	1.264	1.136	0.3672	0.328	1.592	N/A	0.896	0.896	1.096	N/A	1.96	0.7024	1.44	5.616	0.816	0.6184	5.448	1.648	8.8	4.392	1.248	2.536	1.664	1.16
DG(16:0_20:0)	GL	DG	624.569275	[M+NH4]+	C39H76O5	225.6	380.8	502.4	553.6	270.4	921.6	355.2	120.32	173.44	209.28	345.6	N/A	64	528	121.6	505.6	208.96	N/A	130.24	133.44	276.16	492.8	189.76	100.48	649.6	492.8	174.08	225.6
HexCer(d18:1/20:1)	SP	HexCer	753.611869	[M+H]+	C44H83NO8	11.84	8.864	15.968	8.832	3.232	5.088	1.072	1.6224	2.304	N/A	4.128	4.544	1.2992	N/A	1.1616	2.4128	12.384	12.896	11.328	12.512	10.016	22.592	119.04	18.496	9.408	4.416	7.168	5.344
Hex2Cer(d18:1/16:0)	SP	HexCer	861.617744	[M+H]+	C46H87NO13	2.1856	0.8544	3.2	2.1792	0.7712	3.584	0.8992	N/A	N/A	0.14592	2.1504	1.4656	1.152	0.944	1.1904	1.0656	2	2.8224	5.568	1.6416	1.6352	3.1488	19.84	9.952	2.2912	0.6144	0.6944	0.9664
SHexCer(d18:1:/16:0(OH))	SP	HexCer	795.516649	[M+H]+	C40H77NO12S	2.6656	2.416	3.328	2.2592	0.432	1.1072	0.544	0.13568	0.9216	N/A	0.8832	1.8272	0.992	N/A	0.56	0.7648	2.4192	1.4592	2.0992	2.3584	2.176	5.984	42.24	4.736	2.0992	0.9728	0.9376	0.5376
LPC(18:0/0:0)	GP	LPC	523.363791	[M+H]+	C26H54NO7P	0.2672	0.2992	0.3008	0.2896	0.13952	0.1776	0.10976	0.0856	0.10416	N/A	0.4064	0.2368	0.2224	N/A	0.1696	0.4336	0.3488	0.4176	0.4976	0.656	0.3408	0.2544	0.1968	0.304	0.3024	0.3424	0.4592	0.1936
LPC(0:0/19:0)	GP	LPC	537.379441	[M+H]+	C27H56NO7P	0.10496	0.10352	0.12912	0.12032	N/A	0.02512	0.028	0.02592	N/A	0.02512	0.06416	0.11936	0.08144	0.0192	0.03408	0.12608	0.2544	0.11568	0.1792	0.2032	0.3328	0.4544	0.2624	0.2544	0.13552	0.12976	0.1504	0.12496
LPC(20:0/0:0)	GP	LPC	551.395091	[M+H]+	C28H58NO7P	1.1392	1.1904	1.136	1.096	0.7328	0.6224	0.4288	0.4192	0.4112	N/A	2.384	0.7872	0.6432	N/A	0.7984	1.0816	1.4096	1.2048	0.8688	1.936	2.368	1.4592	0.736	2.368	1.032	1.1872	1.2464	0.7344
LPC(20:1/0:0)	GP	LPC	549.379441	[M+H]+	C28H56NO7P	0.5232	0.6208	0.6288	0.464	0.2624	0.312	0.2624	0.2192	0.1824	N/A	0.8624	0.8144	0.7728	N/A	0.5152	1.1408	0.2112	0.3744	0.7536	0.7424	0.4576	0.368	0.5488	0.432	0.2608	0.2768	0.6496	0.6672
LPC(18:2/0:0)	GP	LPC	519.332491	[M+H]+	C26H50NO7P	0.08576	0.044	0.0688	0.0664	0.02368	0.0488	0.0872	N/A	0.0416	0.2928	0.05872	0.05184	0.10928	N/A	0.048	0.2176	0.04688	0.03376	0.08032	0.10064	0.03088	0.04496	0.1016	0.04752	0.06976	0.08848	0.05296	0.12496
LPC(0:0/20:2)	GP	LPC	547.363791	[M+H]+	C28H54NO7P	0.7664	0.7968	0.8416	0.8096	0.08288	0.1616	0.3808	0.13792	0.09264	N/A	0.14816	0.2272	0.488	N/A	0.3104	0.512	1.1296	0.6352	1.888	1.296	0.896	1.1856	2.272	1.2672	1.3344	0.8912	0.8496	2
LPC(O-14:0)	GP	LPC-O	453.321926	[M+H]+	C22H48NO6P	0.592	0.5792	0.6192	0.6048	0.2128	0.3936	0.1632	0.12976	0.1968	N/A	0.5728	0.328	0.4576	N/A	0.1696	0.5968	0.8432	0.5872	0.7312	1.632	1.28	0.6016	0.84	1.792	0.4256	0.7088	1.3344	0.1984
LPC(O-20:0)	GP	LPC-O	537.415826	[M+H]+	C28H60NO6P	0.248	0.3152	0.2832	0.3072	0.15072	0.1744	0.0824	0.07584	0.13632	N/A	0.4624	0.1904	0.4352	N/A	0.5312	0.2368	0.336	0.2064	0.16	0.3024	0.3408	0.4848	0.3552	0.5632	0.11088	0.2816	0.44	0.14896
LPC(O-16:1)	GP	LPC-O	479.337576	[M+H]+	C24H50NO6P	3.056	3.232	3.328	2.544	0.8	3.552	1.08	0.3648	0.6336	N/A	2.128	1.1168	2.352	N/A	0.9104	4.016	4.752	4.416	3.536	5.312	4.816	4.736	3.696	6.992	2.608	4.496	8.688	2.512
LPC(O-18:1)	GP	LPC-O	507.368876	[M+H]+	C26H54NO6P	1.4672	1.424	1.5792	1.384	0.4192	1.1344	0.12416	0.14656	0.168	N/A	0.8	1.472	0.6224	N/A	0.3744	1.392	2.848	2.144	3.088	2.704	2.048	1.3696	2.576	3.664	0.8592	2.32	2.544	0.9216
LPE(P-18:0)	GP	LPE-P	465.321926	[M+H]+	C23H48NO6P	7.2	6.352	8.272	7.088	5.344	16.16	3.936	3.216	2.672	N/A	7.664	8.064	9.376	N/A	7.296	13.872	11.28	7.12	6.48	7.424	6.112	8.608	13.152	18.4	5.744	3.76	14.192	5.936
PC(15:0_16:0)	GP	PC	719.546506	[M+H]+	C39H78NO8P	77.76	61.76	77.6	83.2	13.92	56.4	12.48	9.44	9.6	N/A	24.88	104	8.4	N/A	5.736	42.88	152.8	73.28	100.8	110.4	118.4	180	193.6	256	64.16	80	58.96	59.28
PC(16:0_16:0)	GP	PC	733.562156	[M+H]+	C40H80NO8P	2.3	1.614	2.08	2.58	1.006	2.94	0.522	0.63	0.448	N/A	1.26	2.02	0.456	N/A	0.556	1.92	2.24	3.76	3.4	2.54	2.8	3.16	3.8	4.72	2.32	3.64	1.924	1.396
PC(17:0_20:3)	GP	PC	797.593456	[M+H]+	C45H84NO8P	9.36	4.672	7.784	8.48	5.544	6.28	6.768	3.752	5.792	1.28	18.72	12.24	20.24	N/A	11.52	29.52	3.136	7.024	4.112	N/A	12.56	6.136	3.232	3.84	5.944	2.64	3.224	7.28
PC(18:2_22:1)	GP	PC	839.640406	[M+H]+	C48H90NO8P	4.512	5.416	5.536	6.496	5.4	6.792	7.104	5.296	2.752	N/A	13.36	6.448	10.16	N/A	13.36	11.76	3.576	6.048	4.08	8.08	7.448	2.208	1.352	6.416	7.816	4.976	4.512	3.56
PC(15:0_20:4)	GP	PC	767.546506	[M+H]+	C43H78NO8P	61.04	56.96	57.68	85.6	47.44	96.8	29.84	30.4	33.84	N/A	97.6	123.2	51.28	N/A	26	87.2	70.08	120.8	85.6	135.2	116.8	56.88	59.84	68.8	93.6	84	86.4	52.08
PC(19:0_20:4)	GP	PC	823.609106	[M+H]+	C47H86NO8P	6.192	3.632	5	6.816	8.08	8.96	4.184	4.4	3.48	N/A	10.72	3.808	9.52	N/A	5.376	14.08	5.216	11.04	6.936	8.72	3.336	3.448	3.136	3.392	3.792	2.824	2.576	3.192
PC(16:1_22:6)	GP	PC	803.546506	[M+H]+	C46H78NO8P	30.48	26.4	26.96	41.28	30.64	40.16	26.64	36.08	34.8	N/A	70.8	76.24	90.4	N/A	39.44	141.6	10.64	25.92	14.24	36.4	26.16	14.96	40.32	12.4	26.56	21.04	13.28	18.8
PC(O-18:1_22:6)	GP	PC-O	817.598541	[M+H]+	C48H84NO7P	1.504	1.4256	1.4272	2.016	1.0464	1.4752	0.3072	0.664	0.4144	N/A	0.9216	2.08	1.3056	N/A	1.696	1.728	2.672	4.528	3.84	2.16	2.752	2.912	3.536	5.184	1.48	1.5904	0.8464	1.984
PE(P-15:0_20:4)	GP	PE-P	709.504641	[M+H]+	C40H72NO7P	4.336	7.648	3.424	4.016	2.656	10.016	2.896	2.592	3.872	N/A	9.152	8.864	9.152	N/A	2.96	18.72	2.208	3.632	2.352	4.576	4.288	2.192	4.992	7.328	5.904	3.344	7.904	2.576
PE(P-20:0_22:6)	GP	PE-P	803.582891	[M+H]+	C47H82NO7P	0.6976	1.3264	1.0656	0.9728	0.7088	0.9968	1.1616	1.104	0.9904	N/A	1.1104	0.7952	4.544	N/A	3.712	3.472	0.4128	0.6112	0.3808	1.0336	1.1184	0.9184	0.7792	1.1616	1.2304	0.5616	1.2816	0.5808
SM(d18:0/13:0)	SP	SM	662.536275	[M+H]+	C36H75N2O6P	0.0872	0.04192	0.08048	0.124	0.04656	0.11696	0.04976	0.0328	0.06656	N/A	0.0344	0.03824	0.1392	N/A	0.0928	0.3072	0.11072	0.10176	0.0472	0.06624	0.13136	0.15776	0.11728	0.11776	0.0584	0.14192	0.07648	0.06832
SM(d18:0/22:0)	SP	SM	788.677125	[M+H]+	C45H93N2O6P	3.632	5.792	5.088	3.52	2.992	7.136	1.84	1.3344	3.568	N/A	5.552	4.64	3.328	N/A	1.872	10.656	5.152	3.744	4.048	3.408	3.52	4.064	7.648	6.16	2.64	8.72	3.792	2.16
PE(P-16:0_16:0)	GP	PE-P	675.520291	[M+H]+	C37H74NO7P	4.288	6.288	5.456	4.896	5.872	10.656	1.888	1.4784	3.52	N/A	7.072	9.456	2.304	N/A	1.776	6.304	5.568	6.624	5.12	11.024	8.16	5.072	4.512	21.28	2.544	8.448	3.84	1.0816
PE(P-15:0_18:1)	GP	PE-P	687.520291	[M+H]+	C38H74NO7P	1.84	3.04	2.224	1.712	1.648	2.112	1.792	1.1424	2.432	N/A	4.32	4.144	4.48	N/A	1.696	5.616	1.176	1.3024	0.8992	1.632	1.856	0.6736	0.8528	4.128	2.032	1.2432	2.784	1.4576
PE(P-16:1_22:2)	GP	PE-P	753.567241	[M+H]+	C43H80NO7P	1.728	2.864	2.224	2.224	1.952	4.512	2.08	0.96	1.384	N/A	2.208	2.432	3.584	N/A	2.864	3.648	1.872	3.44	1.3536	4.176	2.144	1.528	2.752	3.456	3.328	2.416	4.208	1.76
PE(P-18:1_20:3)	GP	PE-P	751.551591	[M+H]+	C43H78NO7P	0.5008	0.8976	0.528	0.6368	0.4192	1.1472	0.7264	0.6144	0.2448	N/A	0.712	1.2976	1.808	N/A	1.4064	3.152	0.12128	0.4848	0.3376	0.3312	0.384	0.1432	0.4848	0.4032	0.7296	0.4688	0.4496	0.3312
PE(P-18:0_20:5)	GP	PE-P	749.535941	[M+H]+	C43H76NO7P	0.8176	1.0944	1.1472	1.2512	0.7456	1.696	0.7488	0.6432	0.4688	N/A	0.6384	1.856	2.096	N/A	2.528	2.704	0.4736	2.288	0.5536	1.5232	0.6432	0.448	1.408	1.1184	1.2272	0.6064	1.664	0.6016
PE(P-18:1_22:5)	GP	PE-P	775.551591	[M+H]+	C45H78NO7P	1.5008	2.224	1.888	1.84	1.5344	3.408	1.2368	1.4496	1.064	N/A	1.696	2.16	1.888	0.13952	N/A	2.192	0.6672	2.064	3.328	2.128	1.808	1.0432	2.992	1.856	2.448	1.232	1.968	1.696
PE(P-18:2_22:6)	GP	PE-P	771.520291	[M+H]+	C45H74NO7P	0.8688	0.6944	1.3568	1.4624	0.2128	1.0752	0.5008	0.7376	0.5552	N/A	0.5392	1.936	1.616	N/A	0.9008	3.584	0.472	1.3968	1.2832	1.3792	1.84	0.9072	5.92	1.3904	3.088	0.472	2.576	1.2272
MGDG(16:0_18:1)	GL	MGDG	756.57515	[M+NH4]+	C43H80O10	85.76	49.28	207.36	136.64	205.76	470.4	81.28	51.84	157.76	N/A	154.88	36.16	44.48	N/A	125.44	125.76	33.92	45.44	14.912	43.52	47.04	65.28	23.008	40.64	27.168	42.88	35.84	27.104
MGDG(14:0_18:2)	GL	MGDG	726.5282	[M+NH4]+	C41H74O10	48.32	51.2	106.88	72.64	91.84	339.2	76.48	27.328	142.08	N/A	119.68	16.384	60.8	N/A	46.08	108.8	21.248	24.352	8.512	36.48	40.32	40.32	24.608	13.472	54.4	21.056	27.232	17.44
MGDG(16:0_16:2)	GL	MGDG	726.5282	[M+NH4]+	C41H74O10	62.72	56.32	111.04	97.6	71.36	235.2	48.96	46.08	313.28	N/A	69.44	33.6	21.632	N/A	38.4	84.48	72.96	48	88.32	103.04	48.32	117.76	69.76	72	58.88	110.08	36.16	37.76
PGE2	FA	Eicosanoid	352.2249741	[M-H]-	C20H32O5	1404.8	1433.6	1356.8	1334.4	486.4	662.4	707.2	403.2	368	N/A	1376	1292.8	809.6	N/A	N/A	716.8	5696	1574.4	2211.2	2227.2	2537.6	318.08	896	3232	844.8	4480	451.2	1011.2
PGD1	FA	Eicosanoid	354.2406242	[M-H]-	C20H34O5	995.2	899.2	905.6	976	112.96	428.8	275.84	N/A	70.72	N/A	464	505.6	252.48	N/A	31.008	608	3552	1283.2	1126.4	1721.6	1648	1049.6	854.4	2544	947.2	3552	905.6	886.4
PGE1	FA	Eicosanoid	354.2406242	[M-H]-	C20H34O5	2204.8	2208	2006.4	2179.2	276.16	800	668.8	207.36	266.56	N/A	1414.4	1625.6	928	N/A	N/A	1232	7968	2656	2073.6	3264	3328	1792	1635.2	5024	1849.6	8352	1580.8	1878.4
PC(16:0_14:0)	GP	PC	705.530856	[M+COOH]-	C38H76NO8P	12.32	16.576	10.464	15.456	11.232	22.72	4.64	5.888	N/A	N/A	8.576	27.648	8.8	N/A	4.064	22.016	27.2	11.84	15.776	23.712	23.712	19.776	32.96	25.856	11.296	18.944	15.296	4.16
PC(16:0_18:0)	GP	PC	761.593456	[M+COOH]-	C42H84NO8P	18.88	20.96	22.4	21.92	16.64	21.12	5.856	N/A	12.16	N/A	17.28	15.952	8.512	N/A	10.304	20.96	37.12	27.68	23.04	27.04	31.04	25.28	30.24	57.28	19.2	35.36	22.88	11.248
PE(17:0_18:1)	GP	PE	731.546506	[M-H]-	C40H78NO8P	6.032	5.328	5.024	6.752	11.12	13.536	5.36	3.36	6.272	N/A	8.352	3.648	10.544	N/A	25.76	N/A	3.2	6.976	3.44	3.168	4.352	4.112	2.816	4.8	2.72	3.792	3.792	2.608
PE(22:6_16:0)	GP	PE	763.515206	[M-H]-	C43H74NO8P	2.144	0.968	1.776	1.728	2.08	2.832	0.8272	1.4432	0.4976	N/A	1.0256	2.784	0.9968	0.2592	1.84	1.888	0.3856	1.3952	1.792	2.736	0.9472	1.224	1.3184	2.224	N/A	N/A	1.744	0.536
PE(17:0_22:6)	GP	PE	777.530856	[M-H]-	C44H76NO8P	5.744	6.64	4.608	4.48	7.376	5.856	3.28	4.336	4.64	N/A	4.16	5.04	11.232	N/A	13.888	7.52	N/A	9.024	7.36	8.208	5.184	5.088	6.32	9.712	2.976	4.736	6.064	3.904
PS(18:0_18:2)	GP	PS	787.536336	[M-H]-	C42H78NO10P	86.4	84.48	106.24	95.04	N/A	N/A	88.96	81.6	70.4	25.248	116.8	107.84	158.4	N/A	123.84	283.84	105.6	67.84	113.6	73.28	29.76	36.16	53.44	102.4	120.64	119.68	92.8	25.088
PE(O-14:1_22:6)	GP	PE-O	719.488991	[M-H]-	C41H70NO7P	0.4704	0.6928	0.544	0.8256	0.4048	0.3824	0.7616	0.6064	0.3472	N/A	0.4064	1.5552	1.0944	N/A	0.7408	3.664	0.2896	0.2688	0.536	0.7808	0.9264	N/A	0.88	0.5296	0.3424	0.4016	0.672	0.14384
PE(O-18:2_22:5)	GP	PE-O	775.551591	[M-H]-	C45H78NO7P	3.28	2.96	2.416	3.072	4.128	7.2	2.512	3.088	2.544	N/A	1.984	3.632	7.28	N/A	N/A	6.368	1.4672	3.488	7.12	2.592	2.784	2.448	9.056	2.736	2.096	1.24	1.92	3.664
CarnitineC4:0	FA	CAR	231.147059	[M+H]+	C11H21NO4	0.1472	0.19072	0.16864	0.17504	0.10784	0.07872	0.0544	0.0672	2.0416	0.19456	0.05856	0.07424	0.05184	N/A	N/A	0.06912	0.64	0.0432	0.0448	0.09312	0.07136	0.04992	N/A	0.06336	0.04672	0.18816	0.09824	0.06752
CarnitineC10:0	FA	CAR	315.240959	[M+H]+	C17H33NO4	0.11488	0.09952	0.09056	0.0944	0.21248	0.3296	0.13824	0.07584	0.17088	0.3904	0.22496	0.09696	0.14656	N/A	0.09856	N/A	0.06976	0.09632	0.08576	0.23072	0.10048	N/A	0.07104	0.08928	0.19168	0.20864	0.19296	0.14944
CarnitineC20:0	FA	CAR	455.397459	[M+H]+	C27H53NO4	0.1424	0.1616	0.12096	0.11936	0.07904	0.28608	0.06208	0.06112	0.1168	N/A	0.15136	0.0544	0.13312	N/A	0.08384	N/A	0.10272	0.13184	0.27232	0.22432	0.15872	0.09728	0.10848	0.22016	0.14752	0.1968	0.2176	0.10304
Cer(d18:0/16:0)	SP	Cer	539.527744	[M+H]+	C34H69NO3	1.04	1.064	0.84	0.912	0.7152	0.84	1.304	0.2304	0.4776	N/A	0.4672	0.8	0.2744	N/A	N/A	0.7464	1.184	0.7424	0.944	0.7352	1.168	1.392	1.544	1.52	1.568	0.96	0.576	0.4288
DG(18:1_20:4)	GL	DG	642.522325	[M+NH4]+	C41H70O5	27.168	20.032	30.24	22.944	19.328	84.16	26.336	14.304	4.128	N/A	31.264	25.92	5.6	N/A	6.784	74.88	76.48	21.728	59.52	22.624	51.52	N/A	25.952	66.24	12.896	40.64	6.304	11.808
HexCer(d18:1/20:0)	SP	HexCer	755.627519	[M+H]+	C44H85NO8	1.4528	1.4176	2.9024	0.8096	0.22144	0.832	0.3424	0.09376	0.26336	N/A	1.376	1.1488	0.7136	N/A	N/A	0.8736	1.0624	1.8784	1.9424	1.2352	0.9376	2.9792	13.056	7.232	1.0976	0.4384	1.4656	0.512
HexCer(d18:1/26:1)	SP	HexCer	837.705769	[M+H]+	C50H95NO8	0.88	1.0528	1.5264	0.6944	0.5984	0.752	0.5856	N/A	0.6624	N/A	1.0752	0.9248	1.2736	N/A	0.9792	0.5888	1.0752	0.5984	0.7616	2.32	0.56	1.2672	6.944	3.264	0.768	0.464	0.6464	0.5504
LPC(20:3)	GP	LPC	545.348141	[M+H]+	C28H52NO7P	0.4128	0.4656	0.544	0.4656	N/A	0.2976	0.5136	0.1744	0.2016	0.3392	N/A	0.272	0.8304	N/A	0.248	0.7776	0.6064	0.4992	0.3584	0.6112	0.352	0.4896	0.784	0.528	0.5232	0.6096	0.4688	0.8912
PC(16:0_18:3)	GP	PC	755.546506	[M+H]+	C42H78NO8P	116.8	75.76	100.8	108	159.2	261.6	102.4	95.2	126.4	25.6	204	N/A	126.4	5.152	110.4	N/A	108.8	150.4	51.68	129.6	132.8	88	120	103.2	N/A	124.8	92	69.04
PC(16:0_20:3)	GP	PC	783.577806	[M+H]+	C44H82NO8P	17.52	12.72	13.2	18.96	10.08	23.76	13.2	12	16.8	N/A	27.28	15.28	43.52	1.68	27.36	66	5.336	15.28	6.96	6.832	6.592	N/A	3.528	3.528	N/A	8.16	4.656	6.24
PC(20:4_17:0)	GP	PC	793.562156	[M+H]+	C45H80NO8P	28.4	23.76	26	28.96	23.6	39.84	16.16	14.24	8.88	N/A	N/A	48.48	33.04	N/A	12	36.24	26.08	57.68	41.2	38.72	42.48	30.08	18.48	31.2	29.36	21.12	19.52	11.84
SM(d18:1/18:0)	SP	SM	730.598875	[M+H]+	C41H83N2O6P	0.4976	0.592	0.5408	0.464	0.3248	0.768	0.3504	0.2048	0.10928	N/A	0.4192	0.5008	N/A	N/A	0.1632	0.904	1.0656	0.6528	1.064	0.4976	0.8208	0.8304	1.5568	1.4768	0.3728	0.8464	0.7104	0.4368
PE(P-17:0_18:1)	GP	PE-P	715.551591	[M+H]+	C40H78NO7P	0.4256	0.8848	0.3952	0.4624	0.632	0.6032	0.5952	0.3904	0.6912	N/A	0.7696	0.9088	0.7808	N/A	0.7552	1.1744	0.2704	0.3984	0.272	0.5168	0.88	0.2752	0.3936	0.9344	N/A	0.4368	0.7632	0.14224
PE(P-20:0_18:1)	GP	PE-P	757.598541	[M+H]+	C43H84NO7P	0.4656	0.9664	0.632	0.7936	0.5856	0.48	0.808	0.408	1.224	N/A	0.8528	0.3424	2.832	0.13536	1.792	1.6	0.2224	0.344	N/A	0.3984	0.4576	0.15392	0.1576	0.6096	0.2432	N/A	0.504	0.1904
9-oxoODE	FA	Eicosanoid	294.2194948	[M-H]-	C18H30O3	202.56	247.36	207.36	228.48	114.56	113.92	64.32	N/A	N/A	N/A	377.6	217.6	99.2	N/A	72.96	473.6	585.6	310.72	86.72	105.28	214.08	174.08	219.52	310.08	227.84	200.32	191.68	348.8
FFA(22:2)	FA	FFA	336.30283	[M-H]-	C22H40O2	7.9776	7.152	8.6976	6.0768	N/A	6.4608	5.7888	8.0352	12.192	13.056	4.0416	N/A	6.6048	6.0672	N/A	10.272	4.9152	6.7104	4.9824	3.7056	N/A	16.32	9.696	3.3984	3.7728	12.96	5.3952	11.424
PC(16:0_22:5)	GP	PC	807.577806	[M+COOH]-	C46H82NO8P	9.968	14.288	13.216	11.488	12.848	30.08	7.92	12.368	12.576	N/A	21.92	3.68	12.176	N/A	13.552	33.76	N/A	30.72	15.568	14.528	6.224	4.112	N/A	11.408	10.064	6.72	12.608	8.128
PC(18:0_22:6)	GP	PC	833.593456	[M+COOH]-	C48H84NO8P	14.544	14.416	7.664	10.336	27.68	10.544	8.656	15.776	9.312	N/A	11.296	7.808	15.104	N/A	13.312	43.52	7.52	20.8	19.52	20.16	8.272	N/A	N/A	14.672	7.136	15.056	7.184	10.48
PE(O-18:3_18:1)	GP	PE-O	725.535941	[M-H]-	C41H76NO7P	1.936	2.192	1.296	1.872	1.6	4.32	1.472	1.496	1.4464	N/A	4.208	2.656	3.424	0.24	2.368	8.144	0.6576	1.1008	0.4336	0.4784	0.6784	N/A	N/A	2	1.632	N/A	1.04	0.7552
DG(16:0_22:6)	GL	DG	640.506675	[M+NH4]+	C41H68O5	16.896	17.6	36.8	14.976	38.72	101.44	12.832	13.664	18.368	13.408	24.608	17.408	7.584	N/A	9.792	50.56	14.112	14.976	24.064	26.432	21.792	N/A	26.24	24.352	N/A	17.792	N/A	7.328
LPC(20:2/0:0)	GP	LPC	547.363791	[M+H]+	C28H54NO7P	0.2368	0.1824	0.2064	0.1904	0.0416	0.02976	N/A	0.06992	0.0392	N/A	0.14592	0.152	0.2704	N/A	0.14384	0.3632	N/A	0.1256	0.1888	0.184	0.14352	0.16	0.744	0.09168	0.2512	0.07968	0.3088	0.4128
PC(20:0_22:6)	GP	PC	861.624756	[M+H]+	C50H88NO8P	3.16	2.28	2.296	3.808	6.344	5.92	3.464	4.448	3.096	0.84	6.432	2.36	5.856	N/A	5.8	4.28	N/A	2.672	3.488	4.544	2.2	1.016	N/A	1.704	2.2	1.368	N/A	2.288
PE(P-18:1_20:1)	GP	PE-P	755.582891	[M+H]+	C43H82NO7P	0.2768	0.32	0.3072	0.3104	0.1744	0.4944	0.3552	0.1872	0.2608	N/A	0.4464	0.3776	0.9696	N/A	0.664	0.72	0.08304	0.2096	0.15824	0.3824	0.3216	N/A	N/A	0.5136	0.3136	0.12672	0.36	0.2496
SM(d18:0/18:0)	SP	SM	732.614525	[M+H]+	C41H85N2O6P	2.72	3.04	3.52	4.08	1.592	4.32	0.792	0.7792	1.064	0.3456	1.256	3.024	N/A	N/A	N/A	3.76	6.528	4.48	4.976	N/A	3.52	6.96	9.216	8.768	2.24	4.224	3.12	3.824
PE(P-14:0_18:1)	GP	PE-P	673.504641	[M+H]+	C37H72NO7P	0.5792	1.0912	0.6064	0.9216	0.592	1.224	0.9088	0.4608	1.032	N/A	1.5152	0.3984	1.4976	N/A	0.6256	2.368	0.2368	0.4368	0.224	0.6032	0.656	0.5536	N/A	0.5712	0.424	0.424	0.3488	N/A
PE(P-18:2_18:1)	GP	PE-P	725.535941	[M+H]+	C41H76NO7P	0.7136	1.104	1.096	0.4496	0.7504	1.3904	0.5456	0.6256	0.744	N/A	1.792	1.68	1.984	N/A	2.064	3.168	0.2832	0.4432	0.3488	0.5536	0.3808	N/A	N/A	0.8944	1.3008	0.2224	0.4912	0.13792
PE(20:4_20:0)	GP	PE	795.577806	[M-H]-	C45H82NO8P	1.208	1.76	1.888	1.632	2.208	4.176	1.1664	1.648	0.8272	N/A	4.176	4.304	3.824	N/A	1.3456	4.4	0.424	1.1632	N/A	N/A	0.8336	0.4448	0.7376	2.4	0.584	N/A	0.8976	0.816
PE(O-17:1_18:1)	GP	PE-O	715.551591	[M-H]-	C40H78NO7P	0.8656	0.792	0.84	0.6528	1.0016	1.3584	N/A	0.5344	0.6176	N/A	1.616	1.2704	1.808	N/A	0.8704	1.776	0.3904	0.7152	0.2752	0.3728	0.4576	N/A	0.3056	1.576	N/A	0.4688	0.4384	0.5216
CarnitineC10:1	FA	CAR	313.225309	[M+H]+	C17H31NO4	0.05376	0.06528	0.05824	0.06816	0.07968	0.16992	0.07648	0.06784	0.07744	N/A	0.0752	0.05312	N/A	N/A	0.04032	N/A	0.06816	0.04512	0.03232	0.048	0.031552	0.04096	N/A	0.05376	0.07808	0.05952	0.192	0.08672
LPC(0:0/20:0)	GP	LPC	551.395091	[M+H]+	C28H58NO7P	0.1648	0.1648	0.1776	0.15312	0.04224	N/A	0.02304	0.04336	N/A	N/A	0.0944	0.04512	N/A	N/A	0.072	0.04896	0.3984	0.08672	0.1272	0.28	0.44	0.5584	0.2528	0.5472	0.11072	0.1696	0.2016	0.1808
LPC(O-22:0)	GP	LPC-O	565.447126	[M+H]+	C30H64NO6P	0.336	0.2208	0.296	0.32	0.05632	0.11312	N/A	N/A	N/A	0.07056	0.09024	0.05328	0.14448	N/A	N/A	0.6688	0.656	0.3824	1.1568	0.14144	0.7632	0.7952	0.09296	1.3488	0.3296	0.0968	1.888	0.432
LPC(O-20:1)	GP	LPC-O	535.400176	[M+H]+	C28H58NO6P	0.06304	0.0672	0.072	0.08272	N/A	0.03488	N/A	N/A	0.02144	N/A	0.03664	0.05504	0.08528	N/A	0.05904	0.11152	0.13712	0.06304	0.08288	0.092	0.2016	0.10592	0.11328	0.2096	0.04224	0.1288	0.1504	0.06384
LPE(P-20:0)	GP	LPE-P	493.353226	[M+H]+	C25H52NO6P	0.5008	0.5152	0.7312	0.512	0.4816	0.848	1.0096	0.2992	0.5552	N/A	0.7424	0.416	1.744	N/A	0.7184	1.744	0.7264	0.448	N/A	0.3072	0.512	0.9296	0.4048	0.7072	0.3104	N/A	0.7984	N/A
PC(18:0_18:2)	GP	PC	785.593456	[M+H]+	C44H84NO8P	4.28	3.096	3.704	5.104	5.8	10.64	4.792	6.832	4.04	N/A	9.28	5.728	9.28	0.716	8.48	13.28	N/A	8	3.616	2.136	2.768	1.056	N/A	3.968	N/A	2.816	N/A	3.408
PE(P-16:0_22:1)	GP	PE-P	757.598541	[M+H]+	C43H84NO7P	0.2128	0.5904	0.36	0.4848	0.4576	0.9088	0.4912	0.2288	0.5088	N/A	0.8144	0.8352	0.8048	N/A	0.6112	0.728	0.15152	0.224	0.2416	N/A	1.0016	N/A	N/A	0.592	0.5296	0.552	0.2912	0.1808
TG(16:0_18:1_20:4)	GL	TG	880.75199	[M+NH4]+	C57H100O6	0.3488	0.3904	0.4576	0.3392	0.8096	0.5504	N/A	0.432	0.25536	N/A	0.30784	0.14496	0.24064	N/A	0.16	3.872	0.11392	0.6496	0.15872	0.5088	0.176	0.10912	N/A	0.18848	N/A	0.13536	0.2832	0.09824
FFA(20:4)	FA	FFA	304.24023	[M-H]-	C20H32O2	6.6336	6.2688	6.3456	5.8272	N/A	N/A	1.9104	1.0272	1.0368	N/A	N/A	N/A	2.7648	N/A	1.3248	2.6208	18.24	5.8368	9.1872	10.56	15.168	10.56	9.888	17.856	5.52	7.2192	15.264	4.7616
PI(18:0_22:4)	GP	PI	914.588432	[M-H]-	C49H87O13P	14.952	16.128	16.848	16.776	24.96	42.96	9.216	17.448	15.072	N/A	38.16	15.216	51.36	N/A	17.856	92.16	N/A	13.728	7.728	6.168	7.056	N/A	10.536	7.824	N/A	8.88	N/A	2.904
PC(17:1_18:2)	GP	PC	769.562156	[M+H]+	C43H80NO8P	16.24	10.88	13.6	17.76	6.336	18.48	10.72	10	20.96	N/A	41.2	30.32	55.52	N/A	28	85.6	N/A	N/A	4.528	N/A	15.76	7.8	8	N/A	16.4	13.52	6.192	8.64
PE(P-18:1_20:0)	GP	PE-P	757.598541	[M+H]+	C43H84NO7P	0.272	0.68	0.2192	0.2144	0.3584	0.8576	N/A	0.32	0.1856	N/A	0.64	0.6848	N/A	N/A	0.4032	0.3744	0.256	0.2112	0.2768	0.5056	0.5024	0.1984	N/A	0.5376	N/A	0.3664	0.6064	0.15024
PE(P-16:0_24:6)	GP	PE-P	775.551591	[M+H]+	C45H78NO7P	0.1664	0.4304	0.4512	0.3392	0.1648	0.5088	0.5504	0.4176	0.3152	N/A	0.2	0.592	1.464	N/A	0.5648	0.4928	0.3152	0.2048	0.08416	0.11936	0.1368	N/A	N/A	0.1616	N/A	N/A	0.088	0.044
PE(16:0_22:4)	GP	PE	767.546506	[M-H]-	C43H78NO8P	1.3248	1.3936	1.4768	1.968	2.672	5.712	1.0224	2	1.632	N/A	3.376	2.096	1.984	N/A	2.368	6.704	N/A	2.032	N/A	1.2336	1.0112	N/A	N/A	0.9328	0.8208	N/A	1.3536	1.2368
PE(O-17:1_18:2)	GP	PE-O	713.535941	[M-H]-	C40H76NO7P	0.8128	0.5136	0.7216	0.704	0.568	0.7024	0.3392	0.5616	0.712	0.3664	1.3552	N/A	N/A	N/A	N/A	2.464	0.6	0.44	0.3808	N/A	0.3568	0.24	N/A	0.3568	N/A	0.3888	0.6208	0.4096
LPC(O-18:2)	GP	LPC-O	505.353226	[M+H]+	C26H52NO6P	0.16	0.216	0.1872	0.2304	N/A	0.08992	N/A	N/A	N/A	N/A	0.04304	0.09456	N/A	N/A	0.0944	0.2896	0.3456	0.1984	0.216	0.392	0.2288	0.14416	0.5632	0.4816	0.2016	0.1456	0.424	0.15472
LTB4	FA	Eicosanoid	336.2301	[M-H]-	C20H32O4	1913.6	1932.8	1840	1952	326.4	684.8	N/A	N/A	N/A	N/A	1203.2	1728	N/A	N/A	N/A	N/A	10880	1667.2	1836.8	2044.8	3056	806.4	563.2	5472	899.2	7616	844.8	1123.2
TXB2	FA	Eicosanoid	370.2355388	[M-H]-	C20H34O6	297.28	306.56	314.24	323.2	N/A	163.2	N/A	N/A	N/A	N/A	190.72	270.4	N/A	N/A	N/A	172.48	1497.6	416	260.16	448	358.4	82.24	158.08	662.4	151.36	1987.2	86.08	142.72
PC(O-16:1_20:5)	GP	PC-O	763.551591	[M+H]+	C44H78NO7P	4.096	5.04	4.64	6.736	3.488	N/A	2.784	3.904	6.464	N/A	7.456	4.832	11.52	N/A	9.84	N/A	N/A	N/A	5.248	10.464	8.896	7.872	5.792	7.28	N/A	N/A	2.736	2.832
Cer(d18:1/23:0(2OH))	SP	Cer	651.616559	[M+H]+	C41H81NO4	0.2128	0.5024	0.712	0.2976	N/A	0.0624	N/A	0.1608	N/A	N/A	0.256	0.5888	N/A	N/A	N/A	0.4904	0.872	0.2976	0.504	0.976	1.144	0.768	1.384	0.7568	N/A	0.5064	0.4816	0.3176
CarnitineC14:0	FA	CAR	371.303559	[M+H]+	C21H41NO4	0.08384	0.05472	0.08288	0.06112	0.12704	0.20288	0.07872	N/A	0.06688	N/A	0.11904	0.04544	0.15744	N/A	N/A	N/A	N/A	0.0752	0.10688	0.05824	N/A	N/A	N/A	0.05248	0.11424	0.048	0.23392	0.07872
Cer(d18:2/17:0)	SP	Cer	549.512094	[M+H]+	C35H67NO3	0.6504	0.132	0.5096	0.204	N/A	0.18	N/A	N/A	N/A	N/A	N/A	0.1584	0.156	N/A	N/A	N/A	0.7168	0.5408	0.2096	0.1848	0.7072	0.444	0.708	0.4816	0.7104	0.6216	0.2728	0.2168
Cer(d18:2/18:0)	SP	Cer	563.527744	[M+H]+	C36H69NO3	0.3888	0.42	0.644	0.4864	N/A	N/A	N/A	0.1928	N/A	N/A	N/A	N/A	0.07136	N/A	N/A	N/A	0.36	0.3168	0.3856	0.48	1.496	0.3632	1.008	0.6384	0.5056	1.248	0.6416	0.568
LPC(0:0/18:0)	GP	LPC	523.363791	[M+H]+	C26H54NO7P	0.06288	0.04912	0.05408	0.04912	N/A	N/A	N/A	N/A	N/A	N/A	N/A	N/A	N/A	N/A	0.0184	0.03072	0.12352	0.04688	0.07488	0.09248	0.09072	0.13488	0.088	0.08608	0.03312	0.0536	0.0816	0.06848
PE(P-18:0_22:3)	GP	PE-P	781.598541	[M+H]+	C45H84NO7P	0.3296	0.7056	0.4512	0.4288	0.304	0.2848	0.3872	0.2128	0.4272	N/A	0.224	0.1648	1.1152	0.0584	2.768	1.632	N/A	0.13744	N/A	N/A	N/A	N/A	N/A	0.1664	N/A	N/A	N/A	0.08912
5-isoPGF2VI	FA	Eicosanoid	354.2406	[M-H]-	C20H34O5	806.4	732.8	732.8	739.2	N/A	N/A	N/A	N/A	N/A	N/A	N/A	N/A	N/A	N/A	N/A	166.4	2192	1273.6	761.6	1964.8	1891.2	857.6	755.2	2524.8	528	3072	435.2	368
FFA(22:4)	FA	FFA	332.27153	[M-H]-	C22H36O2	6.8832	6.7392	7.2192	5.5968	N/A	N/A	N/A	N/A	N/A	N/A	N/A	N/A	N/A	N/A	N/A	4.5024	16.896	6.144	15.456	14.784	13.248	10.752	11.52	17.952	3.36	10.848	7.6224	2.784
CarnitineC6:0	FA	CAR	259.178359	[M+H]+	C13H25NO4	0.03264	0.03808	0.018368	0.03552	0.10752	0.05952	0.03296	0.04448	0.14144	N/A	0.0592	0.027104	0.05152	N/A	N/A	N/A	N/A	0.025728	N/A	N/A	N/A	N/A	N/A	N/A	0.04576	0.04	0.064	0.03232
FFA(20:4)	FA	Eicosanoid	304.2402	[M-H]-	C20H32O2	53.44	58.88	37.12	38.4	N/A	N/A	N/A	N/A	N/A	N/A	N/A	N/A	N/A	N/A	N/A	N/A	136	37.44	73.28	73.92	94.72	81.28	64	145.92	36.8	41.92	113.28	38.72
(±)5-HETE	FA	Eicosanoid	320.2351449	[M-H]-	C20H32O3	264	245.12	264	249.6	N/A	N/A	N/A	N/A	N/A	N/A	N/A	N/A	N/A	N/A	N/A	N/A	985.6	339.2	473.6	569.6	864	238.4	326.4	1088	169.92	364.8	165.76	198.72
(±)9-HETE	FA	Eicosanoid	320.2351449	[M-H]-	C20H32O3	172.16	199.68	185.92	245.12	N/A	N/A	N/A	N/A	N/A	N/A	N/A	N/A	N/A	N/A	N/A	N/A	956.8	165.76	339.2	393.6	630.4	194.56	236.48	787.2	165.44	326.4	217.28	246.4
16(17)-EpDPE	FA	Eicosanoid	344.2351449	[M-H]-	C22H32O3	86.72	79.36	96	81.6	N/A	N/A	N/A	N/A	N/A	N/A	N/A	N/A	N/A	N/A	N/A	N/A	231.68	99.52	153.6	126.72	192	134.72	121.92	278.4	85.12	74.88	76.8	111.36
PI(17:0_20.4)	GP	PI	872.541482	[M-H]-	C46H81O13P	12.432	7.104	7.872	6	10.584	19.416	3.696	3.984	14.592	N/A	12.216	15.312	26.88	N/A	10.92	21	4.2	12.264	N/A	N/A	N/A	N/A	N/A	N/A	N/A	N/A	N/A	N/A
LPC(16:3)	GP	LPC	489.285541	[M+H]+	C24H44NO7P	1.3152	1.856	1.2544	1.4128	N/A	N/A	N/A	N/A	N/A	N/A	N/A	N/A	N/A	N/A	N/A	N/A	3.408	N/A	1.152	2.448	1.744	2.112	21.28	0.8896	1.0752	0.5264	2.72	3.728
5(S),15(S)-DiHETE	FA	Eicosanoid	336.2300595	[M-H]-	C20H32O4	63.36	66.56	120	112.64	N/A	N/A	N/A	N/A	N/A	N/A	N/A	68.16	N/A	N/A	N/A	N/A	396.8	85.76	125.76	112	122.56	N/A	N/A	247.36	52.8	267.52	N/A	71.04
LipoxinA4	FA	Eicosanoid	352.46	[M-H]-	C20H32O5	101.12	98.24	98.56	101.12	N/A	N/A	N/A	N/A	N/A	N/A	N/A	N/A	N/A	N/A	N/A	N/A	312	72.64	136.96	199.36	171.84	N/A	67.2	245.76	48.64	299.84	N/A	49.28
DL-Carnitine	FA	CAR	161.105194	[M+H]+	C7H15NO3	0.2528	0.28352	0.27936	0.27488	0.04608	0.0448	0.04256	N/A	3.872	0.5088	N/A	N/A	N/A	N/A	N/A	N/A	N/A	0.0704	N/A	0.16768	N/A	N/A	N/A	N/A	N/A	N/A	N/A	N/A

## Sheet: Table S2
Table S2. Identification of 107 significantly different lipids between NP-F and P-F (nmol/g)
Formula	Compounds	P_F_1	P_F_2	P_F_3	P_F_4	P_F_5	P_F_6	NP_F_1	NP_F_2	NP_F_3	NP_F_4	NP_F_5	NP_F_6	VIP	Pvalue	Fold_Change	Log2FC	Type
C7H15NO3	DL-Carnitine	0.04608	0.0448	0.04256	N/A	3.872	0.5088	N/A	0.0704	N/A	0.16768	N/A	N/A	1.0367875	N/A	7.5844	2.923	up
C9H17NO4	CarnitineC2:0	0.864	0.7744	0.7136	0.3488	30.464	1.3408	0.6592	0.4992	0.23584	0.7136	0.5152	0.24256	1.07922719	0.3349816614161639	12.0413	3.5899	up
C13H25NO4	CarnitineC6:0	0.10752	0.059520000000000003	0.03296	0.04448	0.14144	N/A	N/A	0.025728	N/A	N/A	N/A	N/A	1.67256459	N/A	3	1.585	up
C27H46O	Cholesterol	3980	6880	3844	3168	4040	1440	9560	7320	8120	7240	7880	8240	1.79993735	0.0011207698509542877	0.4829	-1.0502	down
C32H63NO3	Cer(d18:1/14:0)	6.576	8.16	5.872	0.7984	3.256	1.008	29.04	20.8	4.912	6.688	24.4	16.4	1.56011017	0.0215957428490286	0.2511	-1.9937	down
C34H67NO3	Cer(d18:1/16:0)	36.64	30.4	53.2	4.512	37.84	1.608	104.8	42.8	46.32	38.96	92.8	58.16	1.31434416	0.02873710785695173	0.4278	-1.225	down
C35H69NO3	Cer(d18:1/17:0)	2.192	1.392	1.592	0.18	1.048	0.4712	8.56	0.84	1.952	1.576	6.872	4.44	1.38610065	0.07392194919990307	0.2836	-1.8181	down
C36H71NO3	Cer(d18:1/18:0)	1.384	2.336	0.4904	0.524	0.856	2.04	4.872	3.296	4.872	2.008	3.208	3.512	1.79777893	0.002025823473946564	0.3505	-1.5125	down
C38H75NO3	Cer(d18:1/20:0)	1.592	0.748	0.444	0.3656	0.7296	0.5488	1.656	1.448	2.592	1.424	3.232	2.128	1.90575145	0.004338632092940611	0.3548	-1.4949	down
C38H73NO3	Cer(d18:1/20:1)	0.756	0.872	0.3504	0.2512	0.54	N/A	2.552	2.736	5.832	2.448	3.952	3.56	1.75957109	0.001990729266765088	0.1577	-2.6647	down
C40H77NO3	Cer(d18:1/22:1)	1.864	2.632	1	0.864	1.488	N/A	5.208	3.752	7.816	4.208	8.16	6.824	1.47404655	0.0012711181308588879	0.2618	-1.9335	down
C42H81NO3	Cer(d18:1/24:1)	0.968	10.56	0.904	0.6232	3.12	0.2464	6.336	12.48	29.36	11.68	2.752	5.96	1.62473621	0.07991776423640201	0.2395	-2.0619	down
C32H63NO3	Cer(d16:1/16:0)	1.264	1.136	0.3672	0.328	1.592	N/A	1.44	5.616	0.816	0.6184	5.448	1.648	1.13262034	0.14177873821234965	0.3609	-1.4703	down
C34H65NO3	Cer(d18:2/16:0)	1.392	1.336	2.184	0.07792	0.2504	N/A	2.472	3.48	1.992	1.28	7.712	2.288	1.38345822	0.07592354035473801	0.3271	-1.6122	down
C35H67NO3	Cer(d18:2/17:0)	N/A	0.18	N/A	N/A	N/A	N/A	0.7168	0.5408	0.2096	0.1848	0.7072	0.444	2.00438423	N/A	0.3853	-1.3759	down
C36H69NO3	Cer(d18:2/18:0)	N/A	N/A	N/A	0.1928	N/A	N/A	0.36	0.3168	0.3856	0.48	1.496	0.3632	2.02720041	N/A	0.3401	-1.556	down
C39H76O5	DG(14:0_22:0)	448	1737.6	393.6	269.12	390.4	444.8	133.76	82.24	259.84	178.56	182.4	659.2	1.30058735	0.17941840976693701	2.4622	1.2999	up
C40H77NO8	HexCer(d18:1/16:0)	13.152	18.656	20.416	5.12	19.872	1.1456	54.08	45.76	33.28	37.76	18.112	20.928	1.4567707	0.010413319987406591	0.3733	-1.4216	down
C41H79NO8	HexCer(d18:1/17:0)	0.4192	2.2944	1.2064	0.7584	2.3456	0.27488	5.184	3.0688	2.1408	2.1472	2.1984	11.552	1.59750506	0.09162267502255822	0.2776	-1.8489	down
C42H81NO8	HexCer(d18:1/18:0)	1.1968	5.568	1.3376	0.7104	1.8848	0.4448	2.2336	3.424	3.968	4.032	3.616	5.984	1.5253337	0.056678127496049495	0.4791	-1.0616	down
C44H85NO8	HexCer(d18:1/20:0)	0.22144	0.832	0.3424	0.09376	0.26336	N/A	1.0624	1.8784	1.9424	1.2352	0.9376	2.9792	1.71639236	0.006519530160035104	0.2096	-2.2543	down
C42H79NO8	HexCer(d18:1/18:1)	2.8032	8.32	1.4144	1.1104	2.5216	N/A	5.12	10.624	10.432	7.808	3.904	10.112	1.28851652	0.025604186551027735	0.4042	-1.3069	down
C44H83NO8	HexCer(d18:1/20:1)	3.232	5.088	1.072	1.6224	2.304	N/A	12.384	12.896	11.328	12.512	10.016	22.592	1.55448499	0.001166676480914037	0.1956	-2.354	down
C46H87NO8	HexCer(d18:1/22:1)	5.504	10.08	3.456	2.4064	4.672	N/A	16.512	13.92	11.008	17.568	12	22.4	1.30024898	0.0010542683349921281	0.3355	-1.5756	down
C48H91NO8	HexCer(d18:1/24:1)	4.064	7.072	2.832	1.3376	4.896	1.008	8.8	7.584	11.2	9.408	6.272	13.536	1.77084594	0.0019189332738975668	0.3734	-1.4212	down
C46H87NO13	Hex2Cer(d18:1/16:0)	0.7712	3.584	0.8992	N/A	N/A	0.14592	2	2.8224	5.568	1.6416	1.6352	3.1488	1.43514248	0.18367660549177897	0.4817	-1.0538	down
C40H77NO12S	SHexCer(d18:1:/16:0(OH))	0.432	1.1072	0.544	0.13568	0.9216	N/A	2.4192	1.4592	2.0992	2.3584	2.176	5.984	1.61209822	0.022688194814870995	0.2285	-2.1297	down
C40H77NO11S	SHexCer(d18:1:/16:0)	0.9376	2.544	0.9088	0.5536	1.6448	0.48	1.568	2.9568	2.8256	7.232	2.3392	4.704	1.72702478	0.03326031621972961	0.3269	-1.6131	down
C24H50NO7P	LPC(0:0/16:0)	0.4416	0.5408	0.4336	N/A	0.3664	1.0032	1.4	1.1968	1.3984	2.288	1.2256	2.512	1.45420714	0.0035888242401082553	0.3336	-1.5838	down
C26H54NO7P	LPC(18:0/0:0)	0.13952	0.1776	0.10976	0.0856	0.10416	N/A	0.3488	0.4176	0.4976	0.656	0.3408	0.2544	1.73294431	0.0029626702688269513	0.2942	-1.7651	down
C27H56NO7P	LPC(0:0/19:0)	N/A	0.02512	0.028	0.02592	N/A	0.02512	0.2544	0.11568	0.1792	0.2032	0.3328	0.4544	2.14223201	0.005559205064841788	0.1015	-3.3004	down
C27H56NO7P	LPC(19:0/0:0)	0.2992	0.272	0.2592	0.208	0.248	0.15152	1.2112	0.6448	0.8704	1.728	1.904	1.5328	2.1691005	0.0029903756068877054	0.1822	-2.4564	down
C28H58NO7P	LPC(0:0/20:0)	0.04224	N/A	0.02304	0.04336	N/A	N/A	0.3984	0.08672	0.1272	0.28	0.44	0.5584	2.06893057	0.013822565693441398	0.1149	-3.1215	down
C28H58NO7P	LPC(20:0/0:0)	0.7328	0.6224	0.4288	0.4192	0.4112	N/A	1.4096	1.2048	0.8688	1.936	2.368	1.4592	1.44215779	0.004452691497315097	0.3393	-1.5594	down
C28H56NO7P	LPC(0:0/20:1)	0.12512	0.2928	0.3616	0.11856	0.10864	0.0224	2.176	0.6576	2.784	2.256	1.664	2.464	2.05125912	0.00169794848093417	0.0857	-3.5446	down
C28H54NO7P	LPC(0:0/20:2)	0.08288	0.1616	0.3808	0.13792	0.09264	N/A	1.1296	0.6352	1.888	1.296	0.896	1.1856	1.9150386	0.001503544108900769	0.1461	-2.775	down
C28H54NO7P	LPC(20:2/0:0)	0.0416	0.029760000000000002	N/A	0.06992	0.0392	N/A	N/A	0.1256	0.1888	0.184	0.14352	0.16	1.36083275	1.2361426344436417e-4	0.2813	-1.8298	down
C30H54NO7P	LPC(0:0/22:4)	0.3664	1.2592	1.4016	0.3664	0.4688	0.2096	1.2656	2.016	2.128	2.624	0.9232	1.424	1.63007491	0.010650605150316796	0.3923	-1.35	down
C30H52NO7P	LPC(22:5/0:0)	0.5328	1.1216	0.792	0.496	0.5168	0.11168	1.136	1.0704	2.688	3.136	0.9232	1.0144	1.56410546	0.04448029897687607	0.3582	-1.4812	down
C30H50NO7P	LPC(22:6)	0.4352	0.768	0.7952	0.6384	0.4112	1.552	1.4864	1.92	3.36	4.544	1.3824	1.5008	1.78937535	0.028188560856425963	0.3241	-1.6255	down
C22H48NO6P	LPC(O-14:0)	0.2128	0.3936	0.1632	0.12976	0.1968	N/A	0.8432	0.5872	0.7312	1.632	1.28	0.6016	1.71942601	0.007204560184767026	0.2318	-2.109	down
C24H52NO6P	LPC(O-16:0)	7.12	11.744	2.784	1.968	4.096	0.3552	18.88	23.36	26.08	32.32	26.4	19.2	1.85075774	2.9393046594237777e-5	0.1919	-2.3816	down
C26H56NO6P	LPC(O-18:0)	1.696	2.464	0.6368	0.68	0.9936	0.12256	11.024	5.696	6.832	11.168	8.944	9.584	2.02280833	1.4244633366287065e-4	0.1238	-3.0139	down
C28H60NO6P	LPC(O-20:0)	0.15072	0.1744	0.0824	0.07584	0.13632	N/A	0.336	0.2064	0.16	0.3024	0.3408	0.4848	1.5503912	0.009783723984915286	0.4063	-1.2994	down
C30H64NO6P	LPC(O-22:0)	0.05632	0.11312	N/A	N/A	N/A	0.07056	0.656	0.3824	1.1568	0.14144	0.7632	0.7952	1.97621252	0.010503542507671772	0.1232	-3.0209	down
C24H50NO6P	LPC(O-16:1)	0.8	3.552	1.08	0.3648	0.6336	N/A	4.752	4.416	3.536	5.312	4.816	4.736	1.54199306	0.0025902804566512927	0.2799	-1.837	down
C26H54NO6P	LPC(O-18:1)	0.4192	1.1344	0.12416	0.14656	0.168	N/A	2.848	2.144	3.088	2.704	2.048	1.3696	1.82817214	2.02179256410537e-4	0.1683	-2.5709	down
C28H58NO6P	LPC(O-20:1)	N/A	0.03488	N/A	N/A	0.02144	N/A	0.13712	0.06304	0.08288	0.092	0.2016	0.10592	2.09566436	N/A	0.2475	-2.0145	down
C26H52NO6P	LPC(O-18:2)	N/A	0.08992	N/A	N/A	N/A	N/A	0.3456	0.1984	0.216	0.392	0.2288	0.14416	2.09043	N/A	0.3538	-1.499	down
C27H50NO7P	LPE(22:3)	2.976	6.096	5.328	3.536	3.984	0.6752	1.728	1.904	1.2512	1.048	2.144	0.8192	1.37139623	0.03134152422939635	2.5404	1.3451	up
C25H44NO7P	LPE(20:4)	4.752	18.72	4.992	3.92	2.896	7.536	2.608	3.776	3.68	4.56	2.08	1.4304	1.37017135	0.1494622138931963	2.361	1.2394	up
C27H48NO7P	LPE(22:4)	6.88	9.52	4.928	5.952	3.872	1.776	2.08	4.032	2.992	3.552	1.576	1.12	1.38198444	0.04285342063201337	2.1449	1.1009	up
C39H78NO8P	PC(15:0_16:0)	13.92	56.4	12.48	9.44	9.6	N/A	152.8	73.28	100.8	110.4	118.4	180	1.4737437	5.056341557579434e-4	0.1661	-2.5899	down
C40H80NO8P	PC(16:0_16:0)	1.006	2.94	0.522	0.63	0.448	N/A	2.24	3.76	3.4	2.54	2.8	3.16	1.43235439	0.011773346443095654	0.3718	-1.4274	down
C39H76NO8P	PC(15:0_16:1)	21.04	58.96	9.92	5.864	23.36	2.424	42.72	52.88	40.08	63.52	108	82.4	1.65597441	0.008842116521059635	0.312	-1.6804	down
C43H78NO8P	PC(15:0_20:4)	47.44	96.8	29.84	30.4	33.84	N/A	70.08	120.8	85.6	135.2	116.8	56.88	1.02277597	0.02186954634463233	0.4886	-1.0333	down
C45H78NO8P	PC(15:1_22:5)	7.544	7.024	6.736	11.2	8.4	1.728	8.16	27.04	18.56	30	24.72	15.28	1.66370638	0.008036787428860385	0.3445	-1.5374	down
C40H80NO7P	PC(O-16:0_16:1)	8.688	19.04	16.64	10.032	19.2	3.808	57.44	21.12	20.8	18.4	52.8	59.04	1.63122659	0.025367502244883943	0.3371	-1.5688	down
C44H80NO7P	PC(O-16:1_20:4)	7.792	14.96	3.76	4.928	5.104	0.5936	7.6	22.08	13.568	22.88	11.152	14.016	1.44735963	0.018442138451009286	0.4068	-1.2976	down
C50H90NO7P	PC(O-22:2_20:4)	0.4016	0.2048	0.3968	0.3824	0.4448	N/A	0.2864	1.3552	0.5936	1.0224	0.8464	0.5024	1.18753902	0.05143477833999885	0.4768	-1.0685	down
C48H84NO7P	PC(O-18:1_22:6)	1.0464	1.4752	0.3072	0.664	0.4144	N/A	2.672	4.528	3.84	2.16	2.752	2.912	1.58472797	4.6630159879485714e-4	0.2485	-2.0087	down
C39H76NO7P	PE(P-16:0_18:1)	99.36	130.24	64.96	50.08	80.48	14.704	16.64	57.92	27.04	34.72	26.72	17.28	1.31765654	0.04568033782932412	2.4391	1.2863	up
C39H74NO7P	PE(P-16:0_18:2)	20.48	43.84	49.12	28.8	58.24	23.04	12.4	24.16	8.736	8.688	16.16	6.976	1.92107998	0.009538905872206925	2.8983	1.5352	up
C39H72NO7P	PE(P-16:0_18:3)	18.88	34.56	35.52	25.6	48.32	21.44	15.216	12.544	4.832	7.36	8.032	5.84	2.03112655	0.003342341671475749	3.4245	1.7759	up
C45H84NO7P	PE(P-18:0_22:3)	0.304	0.2848	0.3872	0.2128	0.4272	N/A	N/A	0.13744	N/A	N/A	N/A	N/A	1.69500794	N/A	2.3516	1.2336	up
C37H77N2O6P	SM(d18:0/14:0)	4.208	5.728	1.3152	1.304	1.648	0.12336	5.92	6.928	5.184	4.128	4.4	3.888	1.35115215	0.027050779587744142	0.4705	-1.0877	down
C38H77N2O6P	SM(d18:1/15:0)	7.536	21.6	12.752	8.208	11.52	1.5088	37.12	24	21.44	16.16	32.8	40.16	1.59315134	0.004142448255057293	0.3677	-1.4434	down
C40H81N2O6P	SM(d18:1/17:0)	18.72	28.96	23.2	16.16	24.16	4.112	84	30.88	38.72	26.56	72.8	88.64	1.6314129	0.020028871861173737	0.3376	-1.5666	down
C41H83N2O6P	SM(d18:1/18:0)	0.3248	0.768	0.3504	0.2048	0.10928	N/A	1.0656	0.6528	1.064	0.4976	0.8208	0.8304	1.42900507	0.011584951675179067	0.4276	-1.2257	down
C45H89N2O6P	SM(d18:1/22:1)	3.312	9.488	3.856	2.496	3.568	0.9104	8.032	7.072	9.536	6.384	8.72	13.136	1.62275281	0.010599391873744396	0.4469	-1.162	down
C47H87N2O6P	SM(d18:2/24:3)	30.88	85.76	47.52	67.36	60	8.8	12.496	34.88	28.48	25.12	16.96	11.712	1.18426741	0.05172331404293185	2.3164	1.2119	up
C41H78NO7P	PE(P-16:0_20:2)	3.36	7.904	6.576	2.416	4.96	1.072	0.9968	2.832	1.776	2.592	3.344	1.1232	1.17456162	0.08764712503929059	2.0758	1.0537	up
C41H76NO7P	PE(P-16:0_20:3)	13.152	37.44	27.36	15.456	24.16	6.992	8.096	15.072	6.096	8.256	10.288	4.56	1.5633936	0.04384494440905706	2.3786	1.2501	up
C45H82NO7P	PE(P-16:0_24:4)	3.104	18.4	9.168	3.216	4.48	2.896	2.784	3.376	1.904	3.28	5.296	1.616	1.22618471	0.18890475745445556	2.2603	1.1765	up
C34H69NO5	Cer(t18:0/16:0(2OH))	0.1952	2.648	0.256	0.4336	3.784	0.404	4.456	4.44	8.96	6.168	2.92	3.792	1.7665357	0.0062634417246675445	0.2512	-1.9931	down
C36H71NO4	Cer(d18:1/18:0(2OH))	8.16	9.44	2.472	0.88	4.448	0.648	11.28	15.52	16.24	9.36	11.36	11.52	1.65600905	0.001774256712700864	0.346	-1.5312	down
C41H81NO4	Cer(d18:1/23:0(2OH))	N/A	0.0624	N/A	0.1608	N/A	N/A	0.872	0.2976	0.504	0.976	1.144	0.768	2.05534711	N/A	0.1468	-2.7681	down
C18H30O3	13-oxoODE	190.08	288.96	100.16	142.72	107.2	N/A	1356.8	732.8	210.24	154.88	464	441.6	1.056829	0.08069113610450532	0.2961	-1.7558	down
C18H30O3	9-oxoODE	114.56	113.92	64.32	N/A	N/A	N/A	585.6	310.72	86.72	105.28	214.08	174.08	1.44394161	0.10782375009242841	0.3966	-1.3342	down
C18H32O3	12,13-EpOME	496	822.4	236.8	323.2	380.8	N/A	2534.4	1267.2	742.4	540.8	1219.2	1452.8	1.04158025	0.030925754271752114	0.3495	-1.5166	down
C18H32O3	9,10-EpOME	139.52	171.84	132.16	128	135.04	40.32	1110.4	425.6	387.2	241.28	624	416	1.91394247	0.021952984218722264	0.2331	-2.101	down
C18H34O4	9,10-DiHOME	160	112.64	220.8	315.52	282.56	262.08	1827.2	3052.8	492.8	269.12	403.2	736	1.57001194	0.0993979210266555	0.1996	-2.3248	down
C20H30O3	(±)12-HEPE	51.84	27.52	73.28	39.04	43.2	N/A	222.08	84.48	130.56	87.36	107.2	114.88	1.10373332	0.011827086798255039	0.3775	-1.4055	down
C20H32O3	(±)12-HETE	2067.2	1596.8	1609.6	1232	1814.4	102.4	14688	3680	5120	3424	6016	3904	1.6532792	0.042598535271384526	0.2287	-2.1285	down
C20H32O3	(±)15-HETE	125.44	34.24	109.12	246.4	135.04	14.176	1843.2	448	848	780.8	1017.6	633.6	1.97528586	0.008777297693712601	0.1193	-3.0673	down
C20H32O3	11(S)-HETE	377.6	280.64	142.72	287.04	152.32	N/A	4128	937.6	1504	1664	2387.2	969.6	1.31905885	0.018303062877001043	0.1284	-2.9613	down
C20H32O4	LTB4	326.4	684.8	N/A	N/A	N/A	N/A	10880	1667.2	1836.8	2044.8	3056	806.4	1.79657405	N/A	0.1495	-2.7418	down
C22H32O3	14(S)-HDHA	109.76	28.032	83.2	159.36	137.6	N/A	668.8	192.32	579.2	339.2	518.4	422.4	1.25464968	0.0031985263303756953	0.2285	-2.1297	down
C20H32O5	PGE2	486.4	662.4	707.2	403.2	368	N/A	5696	1574.4	2211.2	2227.2	2537.6	318.08	1.08305025	0.047667844030712093	0.2165	-2.2076	down
C20H34O5	PGD1	112.96	428.8	275.84	N/A	70.72	N/A	3552	1283.2	1126.4	1721.6	1648	1049.6	1.4744233	0.00994220812534591	0.1284	-2.9613	down
C20H34O5	PGE1	276.16	800	668.8	207.36	266.56	N/A	7968	2656	2073.6	3264	3328	1792	1.30565678	0.020711902270451513	0.1263	-2.9851	down
C20H34O6	TXB2	N/A	163.2	N/A	N/A	N/A	N/A	1497.6	416	260.16	448	358.4	82.24	1.96333082	N/A	0.3197	-1.6452	down
C20H32O2	FFA(20:4)	N/A	N/A	1.9104	1.0272	1.0368	N/A	18.24	5.8368	9.1872	10.56	15.168	10.56	1.80762257	0.002122876637328484	0.1143	-3.1291	down
C40H80NO8P	PC(16:0_16:0)	143.68	282.88	76.48	79.04	83.52	40	329.6	269.76	377.6	287.36	272	248.96	1.83017155	0.0024260454805534407	0.3952	-1.3393	down
C42H84NO8P	PC(16:0_18:0)	16.64	21.12	5.856	N/A	12.16	N/A	37.12	27.68	23.04	27.04	31.04	25.28	1.29457019	0.011302169997364678	0.4887	-1.033	down
C44H82NO8P	PC(18:1_18:2)	39.68	90.24	49.92	58.4	74.4	9.12	11.792	35.68	19.68	19.04	23.04	7.504	1.39857316	0.030109389814786475	2.7563	1.4627	up
C44H80NO8P	PC(18:2_18:2)	17.12	30.72	40.48	33.76	78.56	2.992	3.968	16.48	4.256	13.216	3.744	3.904	1.43885659	0.05300106776598275	4.4687	2.1599	up
C41H80NO8P	PE(18:1_18:0)	4.464	7.04	1.952	2.192	1.984	0.8752	1.744	2.256	1.664	0.8688	0.8176	0.808	1.20424555	0.12460605219185067	2.2685	1.1817	up
C41H78NO8P	PE(18:0_18:2)	1.2352	5.104	2.192	2.24	3.024	1.4096	1.2272	1.92	0.6832	1.3008	0.8928	0.5696	1.60996535	0.05594468955412824	2.306	1.2054	up
C47H83O13P	PI(18:0_20:4)	357.6	736.8	192.24	259.2	228.72	28.08	30.96	254.4	110.64	75.36	43.68	14.232	1.2969582	0.08521396181809239	3.4059	1.768	up
C44H74NO10P	PS(16:0_22:6)	22.912	23.776	33.92	30.496	17.792	N/A	50.24	45.12	126.08	56.64	46.08	42.56	1.06462131	0.042824540305635074	0.4218	-1.2454	down
C46H78NO10P	PS(18:0_22:6)	288.64	284.48	174.4	215.36	150.4	27.104	255.36	489.6	825.6	508.8	457.6	438.4	1.57227493	0.00788458985845647	0.3833	-1.3835	down
C39H78NO7P	PE(O-18:1_16:0)	1.5664	1.888	0.232	0.6096	0.8096	0.1888	3.424	1.824	0.9408	1.3216	2.24	1.984	1.44065779	0.04016967205451645	0.4512	-1.1482	down
C41H82NO7P	PE(O-18:1_18:0)	0.8128	1.264	0.376	0.3168	0.5888	N/A	3.104	1.312	0.664	0.9408	1.664	1.2192	1.23728298	0.07609981881664615	0.4526	-1.1437	down
C43H84NO7P	PE(O-20:1_18:1)	0.7056	0.816	0.9792	0.6208	0.7104	0.09184	0.14848	0.2528	0.0896	0.192	0.2864	0.15648	1.5552906	0.011750058063271892	3.4855	1.8014	up
C41H76NO7P	PE(O-16:1_20:3)	20.96	60.32	49.12	36.32	36.32	2.592	13.76	25.92	12.32	6.416	11.808	6.256	1.01976095	0.049469341165284786	2.6887	1.4269	up
C47H86NO7P	PE(O-20:1_22:4)	3.056	2.048	2.912	3.136	2.88	0.3504	0.416	1.016	0.376	0.8208	0.5088	0.656	1.60558724	0.009213395129237132	3.7912	1.9227	up

## Sheet: Table S3
Table S3. Identification of 107 significantly different lipids between NP-M and P-M (nmol/g)
Formula	Compounds	P_M_1	P_M_2	P_M_3	P_M_4	P_M_5	P_M_6	NP_M_1	NP_M_2	NP_M_3	NP_M_4	NP_M_5	NP_M_6	VIP	Pvalue	Fold_Change	Log2FC	Type
C32H63NO3	Cer(d18:1/14:0)	2.528	2.048	1.816	0.6936	1.064	3.464	14.72	30.96	16.96	31.84	9.68	9.28	2.41131752	0.00907595108102511	0.1024	-3.2877	down
C34H67NO3	Cer(d18:1/16:0)	13.84	18.16	20.8	N/A	25.12	37.12	199.2	95.2	52.48	25.68	30.32	31.76	1.21180978	0.13242285866236567	0.3176	-1.6547	down
C35H69NO3	Cer(d18:1/17:0)	1.296	1.504	0.2944	0.376	0.632	2	8.16	3.856	3.64	3.976	0.872	3.816	1.92465395	0.023027146159332955	0.2509	-1.9948	down
C36H71NO3	Cer(d18:1/18:0)	1.72	2.4	0.864	0.3424	0.992	1.216	15.68	4.136	1.352	4.24	4.152	3.608	1.93424691	0.09535750559342741	0.2272	-2.138	down
C38H75NO3	Cer(d18:1/20:0)	0.3808	1.704	0.4856	0.3632	0.7408	1.608	8.56	1.432	2.632	2.976	1.896	1.816	1.97196833	0.08616962830094328	0.2735	-1.8704	down
C40H79NO3	Cer(d18:1/22:0)	5.488	6.456	3.504	0.912	3.12	9.6	33.44	4.216	5.88	14.96	7.832	7.224	1.44497307	0.16510959218475732	0.3954	-1.3386	down
C34H65NO3	Cer(d18:1/16:1)	26.08	36.64	33.12	42.16	34.64	33.84	296.8	106.4	153.6	74.32	64.64	59.76	2.1489538	0.05642269622199732	0.2733	-1.8714	down
C38H73NO3	Cer(d18:1/20:1)	0.96	1.088	0.3176	N/A	0.1568	0.84	35.04	3.136	2.144	1.816	2.776	2.424	1.82941358	0.24160768491583778	0.0852	-3.553	down
C40H77NO3	Cer(d18:1/22:1)	2.296	3.04	1.584	N/A	1.264	4.84	42.16	5.672	3.432	5.024	3.528	2.712	1.30841214	0.27508453991532383	0.2499	-2.0006	down
C42H81NO3	Cer(d18:1/24:1)	3.064	20.08	0.6976	N/A	6.28	2.544	36.32	32.08	2.832	16.16	5.008	2.664	1.19511201	0.2272320012795843	0.4123	-1.2782	down
C32H63NO3	Cer(d16:1/16:0)	0.896	0.896	1.096	N/A	1.96	0.7024	8.8	4.392	1.248	2.536	1.664	1.16	1.34779787	0.1299777620265803	0.3364	-1.5718	down
C34H65NO3	Cer(d18:2/16:0)	2.28	0.4584	0.5112	0.0872	0.888	0.7032	2.544	9.36	8.16	7.456	2.296	2.48	2.05846176	0.018101575170987108	0.1526	-2.7122	down
C35H67NO3	Cer(d18:2/17:0)	N/A	0.1584	0.156	N/A	N/A	N/A	0.708	0.4816	0.7104	0.6216	0.2728	0.2168	2.18212817	N/A	0.3132	-1.6748	down
C36H69NO3	Cer(d18:2/18:0)	N/A	N/A	0.07136	N/A	N/A	N/A	1.008	0.6384	0.5056	1.248	0.6416	0.568	2.53395001	N/A	0.0929	-3.4282	down
C44H85NO8	HexCer(d18:1/20:0)	1.376	1.1488	0.7136	N/A	N/A	0.8736	13.056	7.232	1.0976	0.4384	1.4656	0.512	1.37919654	0.22074545867205897	0.2591	-1.9484	down
C42H79NO8	HexCer(d18:1/18:1)	6.176	3.584	1.3856	0.4768	0.592	3.456	37.44	14.816	4.384	3.0112	3.424	2.9408	1.50600689	0.1968679390570755	0.2374	-2.0746000000000002	down
C44H83NO8	HexCer(d18:1/20:1)	4.128	4.544	1.2992	N/A	1.1616	2.4128	119.04	18.496	9.408	4.416	7.168	5.344	1.59640346	0.2402839516525221	0.0992	-3.3335	down
C46H87NO8	HexCer(d18:1/22:1)	9.792	10.176	8.928	0.3552	5.504	7.072	122.24	29.952	9.28	4.864	7.744	4.224	1.05256427	0.28360749361982646	0.2346	-2.0917	down
C40H77NO12S	SHexCer(d18:1:/16:0(OH))	0.8832	1.8272	0.992	N/A	0.56	0.7648	42.24	4.736	2.0992	0.9728	0.9376	0.5376	1.25506379	0.3130977741203536	0.1171	-3.0942	down
C40H77NO11S	SHexCer(d18:1:/16:0)	0.8768	3.296	2.032	0.20928	1.0272	1.888	20.832	9.12	1.6512	1.9584	1.7344	0.8512	1.18161965	0.22462159373810428	0.2581	-1.954	down
C22H46NO7P	LPC(14:0)	0.8272	0.696	0.8672	N/A	0.3488	1.0896	5.088	1.032	0.7584	0.7792	1.28	1.2	1.23456291	0.23853287783471508	0.4532	-1.1418	down
C24H50NO7P	LPC(0:0/16:0)	0.3712	0.7232	0.3216	0.3696	0.3776	0.456	3.664	1.2544	1.1168	1.0816	1.6	1.824	2.37960628	0.02082872883527151	0.2485	-2.0087	down
C26H54NO7P	LPC(0:0/18:0)	N/A	N/A	N/A	N/A	0.0184	0.03072	0.088	0.08608	0.03312	0.0536	0.0816	0.06848	2.33655986	N/A	0.3586	-1.4796	down
C27H56NO7P	LPC(0:0/19:0)	0.06416	0.11936	0.08144	0.0192	0.03408	0.12608	0.2624	0.2544	0.13552	0.12976	0.1504	0.12496	1.85876963	0.010753696580125439	0.4202	-1.2509	down
C28H58NO7P	LPC(0:0/20:0)	0.0944	0.04512	N/A	N/A	0.072	0.04896	0.2528	0.5472	0.11072	0.1696	0.2016	0.1808	2.00391963	0.03692845566114032	0.2671	-1.9045	down
C28H56NO7P	LPC(0:0/20:1)	0.2704	0.352	0.5232	0.03728	0.312	0.456	2.464	1.5632	1.1616	0.9152	1.632	3.056	2.15602477	0.006051805866248759	0.1808	-2.4675	down
C28H54NO7P	LPC(0:0/20:2)	0.14816	0.2272	0.488	N/A	0.3104	0.512	2.272	1.2672	1.3344	0.8912	0.8496	2	1.86409398	0.0046661228810795504	0.2348	-2.0905	down
C26H48NO7P	LPC(18:3)	0.1936	0.10992	0.2976	N/A	0.07536	0.2336	2.384	0.10544	0.24	0.2384	0.5184	0.8256	1.49913284	0.1860296483947976	0.2533	-1.9811	down
C30H54NO7P	LPC(0:0/22:4)	0.3712	0.3808	1.4096	0.10208	0.6944	1.0608	1.4368	1.3376	0.9984	1.808	0.9216	1.632	1.63042172	0.02064429522936292	0.4941	-1.0171	down
C30H52NO7P	LPC(22:5/0:0)	0.3232	0.264	0.9904	0.0608	0.3088	0.4464	1.2096	0.952	0.8784	1.3136	1.04	1.92	1.98928419	0.00240937472746937	0.3273	-1.6113	down
C30H50NO7P	LPC(22:6)	0.4464	0.6656	1.76	0.2288	0.856	1.4496	4.784	1.5248	1.1936	1.616	2.128	2.704	1.80914146	0.046502677175039454	0.3875	-1.3677	down
C22H48NO6P	LPC(O-14:0)	0.5728	0.328	0.4576	N/A	0.1696	0.5968	0.84	1.792	0.4256	0.7088	1.3344	0.1984	1.21700107	0.12036750434139444	0.4812	-1.0553	down
C24H52NO6P	LPC(O-16:0)	11.088	7.84	6.704	0.1904	10.096	10.016	24.8	41.44	9.168	24.16	30.4	7.392	1.40283527	0.03312884296875195	0.3344	-1.5804	down
C26H56NO6P	LPC(O-18:0)	1.952	2.272	1.4384	0.0536	5.904	3.296	10.096	13.328	3.488	10.048	10.976	3.072	1.55611138	0.015588896217877016	0.2924	-1.774	down
C30H64NO6P	LPC(O-22:0)	0.09024	0.05328	0.14448	N/A	N/A	0.6688	0.09296	1.3488	0.3296	0.0968	1.888	0.432	1.53548497	0.21553679822606836	0.3427	-1.545	down
C24H50NO6P	LPC(O-16:1)	2.128	1.1168	2.352	N/A	0.9104	4.016	3.696	6.992	2.608	4.496	8.688	2.512	1.33054704	0.048573720992017226	0.4356	-1.1989	down
C26H54NO6P	LPC(O-18:1)	0.8	1.472	0.6224	N/A	0.3744	1.392	2.576	3.664	0.8592	2.32	2.544	0.9216	1.36204271	0.04167838754936914	0.4341	-1.2039	down
C26H52NO6P	LPC(O-18:2)	0.04304	0.09456	N/A	N/A	0.0944	0.2896	0.5632	0.4816	0.2016	0.1456	0.424	0.15472	1.78307348	0.06461214966105974	0.397	-1.3328	down
C23H44NO7P	LPE(0:0/18:2)	3.888	3.152	9.424	1.2976	3.856	10.528	3.264	2.32	2.224	1.5296	3.008	1.792	1.33022436	0.10556283085396144	2.2738	1.1851	up
C27H50NO7P	LPE(22:3)	4.864	3.248	18.4	0.64	6.08	15.952	1.0752	2.384	2.352	1.2592	2.72	1.904	1.39269114	0.0879541523782999	4.2058	2.0724	up
C25H44NO7P	LPE(20:4)	6.992	7.632	11.376	0.7232	3.264	15.904	3.856	3.744	2.144	2.992	2.8	2.032	1.01371413	0.08844771546176089	2.6122	1.3853	up
C27H48NO7P	LPE(22:4)	6.24	5.36	16.64	1.5312	8.464	23.52	2.976	3.536	2.416	1.3984	2.944	2.496	1.67598869	0.07063674178249105	3.9169	1.9697	up
C27H44NO7P	LPE(22:6)	3.088	3.68	10.544	0.7856	4.624	10.672	3.504	3.488	1.4208	1.888	2.336	2.208	1.00293318	0.12612639091805763	2.2495	1.1696	up
C39H78NO8P	PC(15:0_16:0)	24.88	104	8.4	N/A	5.736	42.88	193.6	256	64.16	80	58.96	59.28	1.40976486	0.07322208031192887	0.3133	-1.6744	down
C40H80NO8P	PC(16:0_16:0)	1.26	2.02	0.456	N/A	0.556	1.92	3.8	4.72	2.32	3.64	1.924	1.396	1.42074428	0.02302226394801071	0.4188	-1.2557	down
C40H76NO8P	PC(14:0_18:2)	168	175.2	184.8	10.64	120	346.4	70.48	29.04	81.6	86.4	49.28	34.72	1.07670501	0.05764297660976677	2.8591	1.5156	up
C44H84NO8P	PC(18:0_18:2)	9.28	5.728	9.28	0.716	8.48	13.28	N/A	3.968	N/A	2.816	N/A	3.408	1.66164989	0.051152441875273603	2.2942	1.198	up
C44H82NO8P	PC(16:0_20:3)	27.28	15.28	43.52	1.68	27.36	66	3.528	3.528	N/A	8.16	4.656	6.24	1.39641177	0.041188304471179264	5.7802	2.5311	up
C48H88NO8P	PC(18:0_22:4)	31.76	14.8	33.44	1.888	16.24	32.8	4.504	10.48	7.336	8.32	6.536	10.4	1.17361427	0.04567777212278049	2.752	1.4605	up
C42H74NO8P	PC(14:0_20:5)	15.6	21.04	21.68	1.728	17.36	36.16	4.48	1.264	4.288	2.856	1.512	2.736	1.94732705	0.016228340344494847	6.6275	2.7285	up
C48H82NO8P	PC(18:1_22:6)	204.8	127.2	232.8	12.4	121.6	595.2	52.96	39.52	95.2	66.56	47.68	72.8	1.09150499	0.12148492078195765	3.4532	1.7879	up
C39H76NO7P	PE(P-16:0_18:1)	128	72.8	138.4	5.344	97.44	135.36	16.16	56.8	38.4	28.16	39.52	17.6	1.13716427	0.027722355889927202	2.936	1.5539	up
C39H74NO7P	PE(P-16:0_18:2)	72.64	38.4	159.04	4.192	79.52	147.84	10.096	18.72	39.04	16.8	23.2	14.56	1.31770355	0.05040921321732473	4.0978	2.0348	up
C39H72NO7P	PE(P-16:0_18:3)	33.92	37.44	53.44	1.712	34.72	70.24	7.792	13.488	11.776	9.072	11.232	6.96	1.26097576	0.028078955847958765	3.8374	1.9401	up
C45H84NO7P	PE(P-18:0_22:3)	0.224	0.1648	1.1152	0.0584	2.768	1.632	N/A	0.1664	N/A	N/A	N/A	0.08912	2.04531958	N/A	7.7781	2.9594	up
C47H87N2O6P	SM(d18:2/24:3)	98.88	69.92	217.6	9.152	62.88	409.6	24	10	52.8	35.52	19.04	27.36	1.4438035	0.11026168429974116	5.1448	2.3631	up
C43H84NO7P	PE(P-20:0_18:1)	0.8528	0.3424	2.832	0.13536	1.792	1.6	0.1576	0.6096	0.2432	N/A	0.504	0.1904	1.4444205	0.07779079764839722	3.6928	1.8847	up
C41H78NO7P	PE(P-16:0_20:2)	7.904	6.256	18.4	0.496	9.856	12.432	1.4416	6.432	4.736	1.712	3.872	1.4928	1.07613152	0.06127789886469304	2.8113	1.4912	up
C41H78NO7P	PE(P-18:0_18:2)	4.112	2.48	15.504	0.8608	20	12.256	1.56	2.912	4.096	1.904	3.84	1.856	1.18425665	0.09762147617578276	3.4149	1.7718	up
C41H76NO7P	PE(P-16:0_20:3)	28.96	23.2	74.88	1.872	31.84	75.2	5.312	18.56	18.56	8.384	13.488	7.04	1.09420091	0.07247131744786994	3.3072	1.7256	up
C43H80NO7P	PE(P-16:0_22:3)	2.672	1.4704	4.608	0.24	5.376	4.48	0.4288	0.9312	0.984	0.5616	0.9488	0.352	1.60218754	0.031051454508650756	4.4804	2.1636	up
C45H78NO7P	PE(P-16:0_24:6)	0.2	0.592	1.464	N/A	0.5648	0.4928	N/A	0.1616	N/A	N/A	0.088	0.044	1.62298735	0.05534087800806221	6.7717	2.7595	up
C34H69NO5	Cer(t18:0/16:0(2OH))	0.4696	2.632	0.5856	0.0952	4.176	0.3088	6.408	19.28	1.56	7.696	7.616	1.704	1.7809933	0.07255815715864732	0.1868	-2.4204	down
C34H67NO4	Cer(d18:1/16:0(2OH))	1.832	3.392	1.808	6.088	1.256	1.632	11.52	10.24	9.28	3.896	5.712	5.448	2.0555829	0.008569613406645832	0.3473	-1.5257	down
C36H71NO4	Cer(d18:1/18:0(2OH))	7.904	4.504	6.096	0.3216	4.016	13.76	32.08	12.48	8.24	10.56	9.84	4.104	1.23338131	0.16792971318063665	0.4735	-1.0786	down
C49H82O15	DGDG(14:0_20:5)	51.2	17.472	29.984	61.76	17.664	72	161.92	23.072	51.52	35.84	166.08	515.2	1.34272288	0.1833851850629762	0.2622	-1.9313	down
C24H46NO7P	LPC(16:2)	1.4784	2.064	2.528	1.2944	1.3664	1.5856	19.2	2.032	2.56	1.4848	5.568	6.64	1.61876533	0.15749184957150864	0.2752	-1.8614	down
C24H40O5	Ursocholicacid	53120	21344	15424	5504	28352	25792	44800	53440	59200	15872	99520	43200	1.4479425	0.06418774179330317	0.4732	-1.0795	down
C24H38O3	lithocholicacid-3-sulfate	7904	3056	2214.4	873.6	4192	3264	6272	8992	9120	2144	18176	7360	1.50340698	0.0695163998997664	0.413	-1.2758	down
C18H34O4	9,10-DiHOME	245.44	311.04	212.16	75.2	569.6	809.6	1468.8	1507.2	665.6	304.64	742.4	1974.4	1.72216944	0.0351497236393222	0.3336	-1.5838	down
C20H32O3	(±)12-HETE	3616	3180.8	1920	53.76	982.4	1715.2	2771.2	9824	3936	4608	5248	5856	1.53918815	0.016104759196670346	0.3557	-1.4913	down
C20H32O3	(±)15-HETE	94.4	79.68	110.4	N/A	88.32	149.44	534.4	1408	400	665.6	448	576	1.46502375	0.013403586616252051	0.1554	-2.6859	down
C20H32O3	11(S)-HETE	342.4	390.4	149.12	N/A	72	240.32	902.4	3164.8	796.8	1376	745.6	995.2	1.40412455	0.03388019157263156	0.1796	-2.4771	down
C20H32O4	5(S),15(S)-DiHETE	N/A	68.16	N/A	N/A	N/A	N/A	N/A	247.36	52.8	267.52	N/A	71.04	1.36694386	N/A	0.4269	-1.228	down
C22H32O3	14(S)-HDHA	84.48	162.24	152	N/A	102.08	85.44	387.2	675.2	368	239.36	412.8	531.2	1.30889376	0.0027554621359933257	0.2691	-1.8938	down
C20H34O5	5-isoPGF2VI	N/A	N/A	N/A	N/A	N/A	166.4	755.2	2524.8	528	3072	435.2	368	2.34363127	N/A	0.1299	-2.9445	down
C20H34O5	PGD1	464	505.6	252.48	N/A	31.008	608	854.4	2544	947.2	3552	905.6	886.4	1.35208653	0.04576833213769887	0.2305	-2.1172	down
C20H34O5	PGE1	1414.4	1625.6	928	N/A	N/A	1232	1635.2	5024	1849.6	8352	1580.8	1878.4	1.37355262	0.12466059846515036	0.3839	-1.3812	down
C20H34O6	TXB2	190.72	270.4	N/A	N/A	N/A	172.48	158.08	662.4	151.36	1987.2	86.08	142.72	1.57999794	0.3416028200139033	0.3975	-1.331	down
C20H32O2	FFA(20:4)	N/A	N/A	2.7648	N/A	1.3248	2.6208	9.888	17.856	5.52	7.2192	15.264	4.7616	1.90636702	0.015169039588175172	0.2218	-2.1727	down
C22H36O2	FFA(22:4)	N/A	N/A	N/A	N/A	N/A	4.5024	11.52	17.952	3.36	10.848	7.6224	2.784	2.2849888800000002	N/A	0.4995	-1.0014	down
C40H80NO8P	PC(16:0_16:0)	145.6	194.24	90.24	39.68	77.12	195.2	444.8	432	161.92	313.92	245.76	190.72	1.87314966	0.014861655469906145	0.4148	-1.2695	down
C42H84NO8P	PC(16:0_18:0)	17.28	15.952	8.512	N/A	10.304	20.96	30.24	57.28	19.2	35.36	22.88	11.248	1.10992916	0.07627882614756765	0.4972	-1.0081	down
C44H84NO8P	PC(18:0_18:2)	124	71.52	275.2	18.08	192	472	26.72	29.76	112.64	79.2	56.64	36.16	1.30406578	0.1004592255433539	3.3795	1.7568	up
C44H82NO8P	PC(18:1_18:2)	100.32	41.92	219.2	6.72	88.48	395.2	15.488	9.056	45.44	24.16	16.64	12.992	1.56911334	0.09321893824416387	6.8821	2.7828	up
C44H80NO8P	PC(18:2_18:2)	47.04	24.8	230.4	7.184	69.6	382.4	7.728	N/A	34.72	11.04	10.368	12.24	1.36455665	0.12520471597288524	8.3384	3.0598	up
C46H80NO8P	PC(18:2_20:4)	73.28	48	158.56	3.712	46.56	185.6	18.88	4.336	36.32	25.6	10.656	19.68	1.28033103	0.06929194035678891	4.4661	2.159	up
C41H80NO8P	PE(18:1_18:0)	7.936	8.544	4.24	0.6784	3.072	12.144	1.1248	3.552	1.2	1.376	1.0064	1.3808	1.59814715	0.04620534635750918	3.7982	1.9253	up
C41H78NO8P	PE(18:0_18:2)	4.368	4.048	7.104	0.7824	2.656	16.32	1.5248	1.1488	1.3104	1.4848	0.848	0.952	1.76362279	0.09321578013853088	4.8534	2.279	up
C43H78NO8P	PE(20:4_18:0)	39.84	51.2	40.32	1.84	27.2	95.2	7.6	13.024	9.664	7.808	7.92	7.84	1.3938596	0.04417958746813003	4.746	2.2467	up
C45H82NO8P	PE(18:0_22:4)	9.008	9.984	11.632	0.6688	8.624	24.48	3.056	4.208	1.984	2.56	1.936	2.896	1.37417982	0.05296730831017123	3.87	1.9523	up
C45H79O13P	PI(16:0_20:4)	56.64	35.52	90	9.072	66.72	69.12	12.24	3.768	6.456	13.512	6.816	3.864	2.17450082	0.009686969390724248	7.0103	2.8095	up
C47H83O13P	PI(18:0_20:4)	525.6	364.8	708	36.24	460.8	919.2	126.24	67.92	75.84	101.52	34.08	21.768	1.89734484	0.016833974217925624	7.054	2.8184	up
C42H82NO10P	PS(18:0_18:0)	284.16	496	348.8	65.6	265.6	755.2	124.16	297.28	143.68	88	166.4	138.24	1.31194673	0.08208002900939808	2.3131	1.2098	up
C39H78NO7P	PE(O-16:0_18:1)	7.632	3.344	7.552	0.2048	3.408	8.208	0.7376	2.592	1.304	0.808	1.68	1.2752	1.15681978	0.038263521170960484	3.6143	1.8537	up
C41H82NO7P	PE(O-18:1_18:0)	0.7728	0.5872	0.576	N/A	0.6784	0.9376	0.9824	5.808	0.5184	1.2192	1.2016	0.4192	1.07093306	0.2935642525891457	0.42	-1.2515	down
C37H72NO7P	PE(O-16:1_16:1)	36.16	21.6	26.4	1.0336	9.552	33.12	2.752	13.376	3.632	7.936	7.296	5.52	1.07972335	0.04734862953815574	3.1562	1.6582	up
C39H76NO7P	PE(O-16:0_18:2)	6.976	3.872	10.224	0.9104	3.872	13.968	N/A	1.376	1.968	0.5664	1.408	1.416	1.57833242	0.04234126115952408	4.9277	2.3009	up
C39H76NO7P	PE(O-16:1_18:1)	200	93.6	204.8	9.088	100.32	225.6	14.064	71.52	37.92	24.32	48.96	34.24	1.37501864	0.03295544258172145	3.6075	1.851	up
C41H80NO7P	PE(O-18:1_18:1)	13.68	5.632	21.92	0.9344	24.48	20.16	2.848	11.92	3.968	3.568	6.976	3.472	1.00235692	0.06940162972173525	2.6504	1.4062	up
C43H84NO7P	PE(O-20:1_18:1)	1.36	0.14192	2.544	0.13904	1.2496	1.872	0.09168	0.4416	0.14176	0.0704	0.232	0.192	1.67679463	0.0461012919382526	6.2479	2.6434	up
C41H78NO7P	PE(O-18:1_18:2)	8.624	4.064	32.64	1.0592	28.32	24.64	2.128	4.016	4.256	2.048	4.704	2.896	1.41001386	0.06275201659412519	4.9555	2.309	up
C41H76NO7P	PE(O-16:1_20:3)	50.4	39.68	114.56	3.76	40.8	117.44	5.856	24.48	19.2	6.816	11.776	14.08	1.48653121	0.05049479921779252	4.4599	2.157	up
C41H76NO7P	PE(O-18:3_18:1)	4.208	2.656	3.424	0.24	2.368	8.144	N/A	2	1.632	N/A	1.04	0.7552	1.41102683	0.10415077977431934	2.5845	1.3699	up
C41H76NO7P	PE(O-18:2_18:2)	7.424	4.736	15.296	0.704	8.208	22.08	1.2992	1.808	2.464	1.32	1.2656	1.1312	1.7816651	0.048085666586821695	6.2929	2.6537	up
C47H86NO7P	PE(O-20:1_22:4)	3.552	0.9136	16.16	0.6032	8.352	8.992	0.3296	1.1168	0.7344	0.304	1.4064	0.9744	1.75055117	0.06897489377052751	7.9277	2.9869	up
C41H72NO7P	PE(O-16:1_20:5)	3.504	4.528	6.368	0.12432	2.544	7.04	2.464	1.728	0.7168	0.496	0.3008	1.1232	1.09446826	0.038736358535129974	3.5304	1.8198	up
C39H76NO8P	LNAPE(16:0/N-18:1)	5.168	4.848	2.32	1.064	2.528	8.064	N/A	2.816	1.92	1.5712	1.3552	1.5344	1.2113077	0.09293944581720405	2.1739	1.1203	up

## Sheet: Table S4
Table S4. Identification of 47 significantly different lipids between P-M and P-F (nmol/g)
Formula	Compounds	P_M_1	P_M_2	P_M_3	P_M_4	P_M_5	P_M_6	P_F_1	P_F_2	P_F_3	P_F_4	P_F_5	P_F_6	VIP	Pvalue	Fold_Change	Log2FC	Type
C9H17NO4	CarnitineC2:0	0.5408	0.4032	0.4576	0.12576	0.09376	0.27776	0.864	0.7744	0.7136	0.3488	30.464	1.3408	2.37225207	0.32182385768422367	0.055	-4.1844	down
C10H19NO4	CarnitineC3:0	0.3616	0.31264	0.3424	0.26816	0.17792	0.2784	0.848	0.352	0.23072	0.2208	7.936	0.832	1.76964465	0.29792526689407595	0.1671	-2.5812	down
C11H21NO4	CarnitineC4:0	0.05856	0.07424	0.05184	N/A	N/A	0.06912	0.10784	0.07872	0.0544	0.0672	2.0416	0.19456	2.31707754	0.3165753801604732	0.1496	-2.7408	down
C19H37NO4	CarnitineC12:0	0.0736	0.07584	0.25248	N/A	0.13376	0.12608	0.07648	0.2128	0.18848	0.07008	0.1872	1.3984	1.80088913	0.33962074133115083	0.3722	-1.4259	down
C32H63NO3	Cer(d18:1/14:0)	2.528	2.048	1.816	0.6936	1.064	3.464	6.576	8.16	5.872	0.7984	3.256	1.008	1.44923785	0.12423333585966108	0.4524	-1.1443	down
C40H77NO8	HexCer(d18:1/16:0)	46.08	22.336	64.96	2.3456	38.08	43.52	13.152	18.656	20.416	5.12	19.872	1.1456	1.67030802	0.0464423462383738	2.7733	1.4716	up
C22H46NO7P	LPC(14:0)	0.8272	0.696	0.8672	N/A	0.3488	1.0896	0.5856	0.9792	0.3488	0.6208	0.3616	11.68	1.3987436	0.4109382154953514	0.3152	-1.6657	down
C26H54NO7P	LPC(18:0/0:0)	0.4064	0.2368	0.2224	N/A	0.1696	0.4336	0.13952	0.1776	0.10976	0.0856	0.10416	N/A	1.02654594	0.02947335666453331	2.3819	1.2521	up
C27H56NO7P	LPC(0:0/19:0)	0.06416	0.11936	0.08144	0.0192	0.03408	0.12608	N/A	0.02512	0.028	0.02592	N/A	0.02512	2.72493212	0.04298877929098531	2.8438	1.5078	up
C28H56NO7P	LPC(20:1/0:0)	0.86240000000000006	0.8144	0.7728	N/A	0.5152	1.1408	0.2624	0.312	0.2624	0.2192	0.1824	N/A	1.15646671	0.0037747486675915446	3.3152	1.7291	up
C28H54NO7P	LPC(20:2/0:0)	0.14592	0.152	0.2704	N/A	0.14384	0.3632	0.0416	0.029760000000000002	N/A	0.06992	0.0392	N/A	2.25590485	0.01691792975223091	4.7667	2.253	up
C28H60NO6P	LPC(O-20:0)	0.4624	0.1904	0.4352	N/A	0.5312	0.2368	0.15072	0.1744	0.0824	0.07584	0.13632	N/A	1.22591667	0.01812092423353031	2.9951	1.5826	up
C30H64NO6P	LPC(O-22:0)	0.09024	0.05328	0.14448	N/A	N/A	0.6688	0.05632	0.11312	N/A	N/A	N/A	0.07056	1.026229	0.3516968731946878	2.99	1.5801	up
C26H54NO6P	LPC(O-18:1)	0.8	1.472	0.6224	N/A	0.3744	1.392	0.4192	1.1344	0.12416	0.14656	0.168	N/A	1.02245835	0.10170061960370315	2.3394	1.2261	up
C28H58NO6P	LPC(O-20:1)	0.03664	0.05504	0.08528	N/A	0.05904	0.11152	N/A	0.03488	N/A	N/A	0.02144	N/A	2.57753554	N/A	2.4682	1.3035	up
C27H50NO7P	LPE(22:3)	4.864	3.248	18.4	0.64	6.08	15.952	2.976	6.096	5.328	3.536	3.984	0.6752	1.00433182	0.19940859824695817	2.1767	1.1221	up
C39H76NO8P	PC(15:0_16:1)	60.56	123.2	25.28	1.376	16.08	68.32	21.04	58.96	9.92	5.864	23.36	2.424	1.03679429	0.1927732643891025	2.4251	1.278	up
C40H76NO8P	PC(14:0_18:2)	168	175.2	184.8	10.64	120	346.4	63.04	145.6	71.92	49.92	96.8	17.12	1.26278118	0.09468694516132639	2.2616	1.1773	up
C42H80NO8P	PC(16:0_18:2)	32.96	23.76	46.88	1.928	34.88	64.24	10.16	26.56	16.56	13.52	16.56	4.624	1.18318482	0.07509113231145112	2.326	1.2179	up
C43H82NO8P	PC(17:1_18:1)	153.6	144	156.8	9.92	78.4	274.4	52.08	104	65.76	45.28	63.44	15.36	1.34727701	0.08398241746490379	2.3622	1.2401	up
C40H74NO8P	PC(14:0_18:3)	51.76	65.52	47.92	3.424	72.4	93.6	42.96	29.2	25.92	37.36	24.8	6.32	1.03227544	0.07752932712141324	2.009	1.0065	up
C42H74NO8P	PC(14:0_20:5)	15.6	21.04	21.68	1.728	17.36	36.16	6.76	9.84	6.32	6.264	7.8	1.664	1.93698528	0.039557420639510746	2.9385	1.5551	up
C45H78NO8P	PC(15:1_22:5)	12.64	21.2	17.2	1.52	12	50	7.544	7.024	6.736	11.2	8.4	1.728	1.53028585	0.1371281741075141	2.6872	1.4261	up
C40H80NO7P	PC(O-16:0_16:1)	30.24	36	29.28	2.016	14.656	74.08	8.688	19.04	16.64	10.032	19.2	3.808	1.20997799	0.13197096008080597	2.4064	1.2669	up
C45H84NO7P	PE(P-18:0_22:3)	0.224	0.1648	1.1152	0.0584	2.768	1.632	0.304	0.2848	0.3872	0.2128	0.4272	N/A	1.42560114	0.1859006840168949	3.0747	1.6204	up
C40H81N2O6P	SM(d18:1/17:0)	44.64	67.2	49.44	2.448	21.12	117.28	18.72	28.96	23.2	16.16	24.16	4.112	1.18589721	0.11545650681741669	2.6201	1.3896	up
C47H87N2O6P	SM(d18:2/24:3)	98.88	69.92	217.6	9.152	62.88	409.6	30.88	85.76	47.52	67.36	60	8.8	1.37051981	0.17841053986552965	2.8904	1.5313	up
C38H72NO7P	PE(P-15:0_18:2)	7.232	5.424	14.16	0.6944	6.848	20.64	1.3536	3.408	4.4	2.608	6.672	1.808	1.52973274	0.10411574283922066	2.716	1.4415	up
C41H78NO7P	PE(P-16:0_20:2)	7.904	6.256	18.4	0.496	9.856	12.432	3.36	7.904	6.576	2.416	4.96	1.072	1.00895248	0.11479534568847942	2.1053	1.074	up
C41H78NO7P	PE(P-18:0_18:2)	4.112	2.48	15.504	0.8608	20	12.256	1.5456	2.48	5.488	2.176	3.952	2.512	1.47231324	0.11203329500325056	3.0414	1.6047	up
C41H72NO7P	PE(P-16:1_20:4)	1.1792	4.144	4.592	0.06736	1.5472	8.096	0.4944	2.288	1.592	0.9392	1.984	N/A	1.22852213	0.1987766419272878	2.2411	1.1642	up
C45H80NO7P	PE(P-18:1_22:4)	1.4992	3.408	5.808	0.328	4.208	6.784	1.1376	3.76	1.1232	1.4064	0.9344	1.1424	1.34691389	0.10043093652734146	2.3185	1.2132	up
C41H81NO4	Cer(d18:1/23:0(2OH))	0.256	0.5888	N/A	N/A	N/A	0.4904	N/A	0.0624	N/A	0.1608	N/A	N/A	1.27651074	N/A	3.9881	1.9957	up
C18H30O3	9-oxoODE	377.6	217.6	99.2	N/A	72.96	473.6	114.56	113.92	64.32	N/A	N/A	N/A	1.52490041	0.12586722787561025	2.543	1.3465	up
C18H32O3	9,10-EpOME	473.6	240.32	241.92	32	258.24	652.8	139.52	171.84	132.16	128	135.04	40.32	1.63886712	0.08190178077536002	2.5424	1.3462	up
C10H20O2	FFA(10:0)	5203.2	5107.2	4512	5097.6	5721.6	4387.2	8256	4512	4454.4	4732.8	33024	6038.4	1.39252954	0.3136072534425099	0.4921	-1.023	down
C44H84NO8P	PC(18:0_18:2)	124	71.52	275.2	18.08	192	472	36.8	112.16	92.96	62.72	138.08	10.16	1.51973585	0.14704923489336258	2.5455	1.3479	up
C44H82NO8P	PC(18:1_18:2)	100.32	41.92	219.2	6.72	88.48	395.2	39.68	90.24	49.92	58.4	74.4	9.12	1.02320872	0.19497515361598905	2.6474	1.4046	up
C44H80NO8P	PC(18:2_18:2)	47.04	24.8	230.4	7.184	69.6	382.4	17.12	30.72	40.48	33.76	78.56	2.992	1.50641609	0.18817201022117058	3.7392	1.9027	up
C46H80NO8P	PC(18:2_20:4)	73.28	48	158.56	3.712	46.56	185.6	39.68	75.52	34.24	44.48	41.44	1.824	1.02819326	0.17799250708474038	2.1743	1.1206	up
C41H78NO8P	PE(18:0_18:2)	4.368	4.048	7.104	0.7824	2.656	16.32	1.2352	5.104	2.192	2.24	3.024	1.4096	1.42809475	0.20355617594684058	2.3202	1.2142	up
C40H76NO7P	PE(O-17:1_18:2)	1.3552	N/A	N/A	N/A	N/A	2.464	0.568	0.7024	0.3392	0.5616	0.712	0.3664	2.18468506	N/A	3.5258	1.818	up
C41H78NO7P	PE(O-18:1_18:2)	8.624	4.064	32.64	1.0592	28.32	24.64	3.632	5.328	7.536	5.28	5.536	0.784	1.62047003	0.08532330179419352	3.536	1.8221	up
C41H76NO7P	PE(O-18:2_18:2)	7.424	4.736	15.296	0.704	8.208	22.08	1.496	5.088	2.576	4.384	3.296	N/A	1.79385471	0.09980707212172114	2.8923	1.5322	up
C42H76NO7P	PE(O-17:1_20:4)	19.52	24.48	29.28	0.8736	15.312	65.28	4.912	18.72	12.784	8.112	10.656	3.088	1.0643705	0.13166633364286268	2.6556	1.409	up
C45H82NO7P	PE(O-18:1_22:4)	22.88	16.96	87.68	6.336	110.72	78.4	38.24	39.84	23.52	29.44	25.12	3.728	1.03479538	0.195782680542698	2.02	1.0144	up
C47H86NO7P	PE(O-20:1_22:4)	3.552	0.9136	16.16	0.6032	8.352	8.992	3.056	2.048	2.912	3.136	2.88	0.3504	1.15700275	0.16030592056278395	2.6819	1.4233	up

## Sheet: Table S5
Table S5. Identification of 7 significantly different lipids between NP-M and NP-F (nmol/g)
Formula	Compounds	NP_M_1	NP_M_2	NP_M_3	NP_M_4	NP_M_5	NP_M_6	NP_F_1	NP_F_2	NP_F_3	NP_F_4	NP_F_5	NP_F_6	VIP	Pvalue	Fold_Change	Log2FC	Type
C17H31NO4	CarnitineC10:1	N/A	0.05376	0.07808	0.059520000000000003	0.192	0.08672	0.06816	0.04512	0.03232	0.048	0.031552	0.04096	1.13466509	0.12043724855159743	2.1198	1.0839	up
C47H86NO8P	PC(19:0_20:4)	3.136	3.392	3.792	2.824	2.576	3.192	5.216	11.04	6.936	8.72	3.336	3.448	2.55789938	0.045511700097609055	0.4887	-1.033	down
C46H80NO8P	PC(16:0_22:6)	1.16	2.384	2.28	2.896	2.608	1.44	1.544	10.64	4.576	4.84	2.872	1.512	1.63158496	0.17664266501833856	0.4914	-1.025	down
C43H74NO7P	PE(P-18:2_20:4)	8.32	3.008	7.584	2.256	4.592	2.16	1.4192	3.344	1.76	3.632	2.32	1.384	1.99634619	0.091213696826117	2.0145	1.0104	up
C45H74NO7P	PE(P-18:2_22:6)	5.92	1.3904	3.088	0.472	2.576	1.2272	0.472	1.3968	1.2832	1.3792	1.84	0.9072	1.24739186	0.18646290422294373	2.016	1.0115	up
C37H64O5	DG(16:2_18:2)	419.2	87.68	183.04	83.2	109.44	181.44	374.4	274.56	464	329.6	168.64	691.2	2.38956797	0.047330313584191416	0.4621	-1.1137	down
C24H44NO7P	LPC(16:3)	21.28	0.8896	1.0752	0.5264	2.72	3.728	3.408	N/A	1.152	2.448	1.744	2.112	1.00741171	0.42535472744333463	2.318	1.2129	up

## Sheet: Table S6
Table S6. Metabolic pathway identified from the significantly different lipids between NP-F and P-F.
Pathway	ko_ID	Unique compound	compound	cpd_id
Thermogenesis	ko04714	2	115	C02301(up)+C00318(up)
Bile secretion	ko04976	5	6	C00584(down)+C00187(down)+C00318(up)+C02165(down)+C05963(down)
Diabetic cardiomyopathy	ko05415	15	38	C00195(down)+C00195(down)+C00195(down)+C00195(down)+C00195(down)+C00195(down)+C00195(down)+C00318(up)+C00195(down)+C00195(down)+C00195(down)+C00195(down)+C00195(down)+C00195(down)+C00195(down)
Insulin resistance	ko04931	15	123	C00195(down)+C00195(down)+C00195(down)+C00195(down)+C02571(up)+C00195(down)+C00195(down)+C00195(down)+C00195(down)+C00195(down)+C00195(down)+C00195(down)+C00195(down)+C00195(down)+C00195(down)
Steroid biosynthesis	ko00100	1	1	C00187(down)
Primary bile acid biosynthesis	ko00120	1	2	C00187(down)
Steroid hormone biosynthesis	ko00140	1	1	C00187(down)
Insect hormone biosynthesis	ko00981	1	1	C00187(down)
Steroid degradation	ko00984	1	1	C00187(down)
Biosynthesis of alkaloids derived from terpenoid and polyketide	ko01066	1	1	C00187(down)
Metabolic pathways	ko01100	64	369	C00350(up)+C00157(down)+C00195(down)+C00195(down)+C00157(down)+C00195(down)+C00350(up)+C00157(down)+C01290(down)+C00195(down)+C02737(down)+C01190(down)+C01190(down)+C01190(down)+C06125(down)+C01190(down)+C01190(down)+C00350(up)+C00195(down)+C00157(down)+C00195(down)+C02737(down)+C00350(up)+C00584(down)+C06125(down)+C00157(down)+C05963(down)+C00550(up)+C01190(down)+C01190(down)+C01190(down)+C00195…
Microbial metabolism in diverse environments	ko01120	1	1	C00187(down)
Ovarian steroidogenesis	ko04913	3	4	C00187(down)+C00219(down)+C14777(down)
Aldosterone synthesis and secretion	ko04925	3	9	C14777(down)+C00187(down)+C00219(down)
Cortisol synthesis and secretion	ko04927	1	1	C00187(down)
Cushing syndrome	ko04934	1	1	C00187(down)
Fat digestion and absorption	ko04975	1	99	C00187(down)
Vitamin digestion and absorption	ko04977	1	94	C00187(down)
Cholesterol metabolism	ko04979	1	87	C00187(down)
Pathways in cancer	ko05200	2	9	C00584(down)+C00187(down)
Basal cell carcinoma	ko05217	1	1	C00187(down)
Lipid and atherosclerosis	ko05417	1	86	C00187(down)
Sphingolipid metabolism	ko00600	31	68	C00195(down)+C00195(down)+C00195(down)+C00195(down)+C00195(down)+C00195(down)+C00195(down)+C00550(up)+C01190(down)+C01190(down)+C01190(down)+C01190(down)+C00550(down)+C00550(down)+C01290(down)+C00195(down)+C00195(down)+C00550(down)+C00195(down)+C00195(down)+C01190(down)+C00550(down)+C01190(down)+C06125(down)+C01190(down)+C01190(down)+C00195(down)+C06125(down)+C00195(down)+C00550(down)+C00195(down)
Sphingolipid signaling pathway	ko04071	20	59	C00550(down)+C00195(down)+C00195(down)+C00550(down)+C00195(down)+C00550(down)+C00195(down)+C00195(down)+C00195(down)+C00195(down)+C00195(down)+C00195(down)+C00195(down)+C00195(down)+C00195(down)+C00195(down)+C00550(down)+C00195(down)+C00550(up)+C00550(down)
Necroptosis	ko04217	21	54	C00195(down)+C00550(down)+C00219(down)+C00195(down)+C00195(down)+C00550(down)+C00195(down)+C00550(down)+C00195(down)+C00195(down)+C00550(down)+C00195(down)+C00195(down)+C00195(down)+C00195(down)+C00195(down)+C00195(down)+C00195(down)+C00195(down)+C00550(up)+C00550(down)
Neurotrophin signaling pathway	ko04722	14	37	C00195(down)+C00195(down)+C00195(down)+C00195(down)+C00195(down)+C00195(down)+C00195(down)+C00195(down)+C00195(down)+C00195(down)+C00195(down)+C00195(down)+C00195(down)+C00195(down)
Adipocytokine signaling pathway	ko04920	14	37	C00195(down)+C00195(down)+C00195(down)+C00195(down)+C00195(down)+C00195(down)+C00195(down)+C00195(down)+C00195(down)+C00195(down)+C00195(down)+C00195(down)+C00195(down)+C00195(down)
AGE-RAGE signaling pathway in diabetic complications	ko04933	14	37	C00195(down)+C00195(down)+C00195(down)+C00195(down)+C00195(down)+C00195(down)+C00195(down)+C00195(down)+C00195(down)+C00195(down)+C00195(down)+C00195(down)+C00195(down)+C00195(down)
Leishmaniasis	ko05140	18	48	C00195(down)+C00195(down)+C00195(down)+C00195(down)+C00195(down)+C00195(down)+C00195(down)+C00195(down)+C00195(down)+C00219(down)+C00584(down)+C00195(down)+C02737(down)+C00195(down)+C02737(down)+C00195(down)+C00195(down)+C00195(down)
Glycerolipid metabolism	ko00561	1	116	C00641(up)
Inositol phosphate metabolism	ko00562	1	23	C00641(up)
Glycerophospholipid metabolism	ko00564	45	235	C00157(down)+C00350(up)+C00157(down)+C04230(down)+C04230(down)+C04230(down)+C00157(down)+C00350(up)+C04230(down)+C04230(down)+C04230(down)+C04230(down)+C04230(down)+C04230(down)+C02737(down)+C00350(up)+C04230(down)+C04230(down)+C00157(down)+C04230(down)+C00157(up)+C04230(down)+C00157(down)+C00157(down)+C00157(down)+C04230(down)+C00350(up)+C04230(down)+C00157(up)+C00350(up)+C04230(down)+C00350(up)…
Biosynthesis of secondary metabolites	ko01110	25	198	C00157(down)+C00641(up)+C02737(down)+C00350(up)+C00350(up)+C00350(up)+C00157(down)+C00350(up)+C00157(down)+C00157(down)+C00157(down)+C00157(down)+C00157(down)+C00350(up)+C00157(up)+C00350(up)+C00157(down)+C00157(up)+C00350(up)+C02737(down)+C00157(down)+C00350(up)+C00157(down)+C00350(up)+C00157(down)
Phosphatidylinositol signaling system	ko04070	1	23	C00641(up)
Long-term depression	ko04730	2	30	C00641(up)+C00219(down)
Choline metabolism in cancer	ko05231	33	126	C00157(down)+C04230(down)+C04230(down)+C00157(down)+C04230(down)+C04230(down)+C04230(down)+C00157(down)+C04230(down)+C04230(down)+C04230(down)+C04230(down)+C04230(down)+C04230(down)+C00157(up)+C04230(down)+C04230(down)+C00157(down)+C00157(up)+C04230(down)+C04230(down)+C00157(down)+C00157(down)+C00157(down)+C04230(down)+C00157(down)+C00157(down)+C00157(down)+C04230(down)+C00157(down)+C04230(down)+…
Ether lipid metabolism	ko00565	1	1	C04317(down)
Arachidonic acid metabolism	ko00590	19	94	C02165(down)+C14777(down)+C05963(down)+C00157(up)+C00219(down)+C00157(down)+C00157(down)+C00584(down)+C00157(up)+C00157(down)+C00157(down)+C00157(down)+C00157(down)+C00157(down)+C00157(down)+C00157(down)+C00157(down)+C04742(down)+C00157(down)
Linoleic acid metabolism	ko00591	19	92	C00157(down)+C00157(up)+C00157(down)+C00157(down)+C00157(down)+C00157(down)+C14766(down)+C00157(down)+C00157(down)+C00157(down)+C00157(down)+C14826(down)+C14828(down)+C14765(down)+C14825(down)+C00219(down)+C00157(down)+C00157(up)+C00157(down)
alpha-Linolenic acid metabolism	ko00592	13	84	C00157(down)+C00157(up)+C00157(down)+C00157(down)+C00157(down)+C00157(down)+C00157(down)+C00157(down)+C00157(down)+C00157(down)+C00157(down)+C00157(up)+C00157(down)
Retrograde endocannabinoid signaling	ko04723	23	167	C00350(up)+C00157(up)+C00219(down)+C00157(down)+C00157(down)+C00350(up)+C00157(down)+C00350(up)+C00157(down)+C00350(up)+C00157(down)+C00350(up)+C00157(up)+C00350(up)+C00157(down)+C00157(down)+C00157(down)+C00157(down)+C00157(down)+C00157(down)+C00350(up)+C00350(up)+C00350(up)
Glycosylphosphatidylinositol (GPI)-anchor biosynthesis	ko00563	9	76	C00350(up)+C00350(up)+C00350(up)+C00350(up)+C00350(up)+C00350(up)+C00350(up)+C00350(up)+C00350(up)
Autophagy - other	ko04136	9	76	C00350(up)+C00350(up)+C00350(up)+C00350(up)+C00350(up)+C00350(up)+C00350(up)+C00350(up)+C00350(up)
Autophagy - yeast	ko04138	9	76	C00350(up)+C00350(up)+C00350(up)+C00350(up)+C00350(up)+C00350(up)+C00350(up)+C00350(up)+C00350(up)
Autophagy - animal	ko04140	9	76	C00350(up)+C00350(up)+C00350(up)+C00350(up)+C00350(up)+C00350(up)+C00350(up)+C00350(up)+C00350(up)
Pathogenic Escherichia coli infection	ko05130	9	78	C00350(up)+C00350(up)+C00350(up)+C00350(up)+C00350(up)+C00350(up)+C00350(up)+C00350(up)+C00350(up)
Kaposi sarcoma-associated herpesvirus infection	ko05167	9	81	C00350(up)+C00350(up)+C00350(up)+C00350(up)+C00350(up)+C00350(up)+C00350(up)+C00350(up)+C00350(up)
Inflammatory mediator regulation of TRP channels	ko04750	4	11	C02165(down)+C00219(down)+C00584(down)+C04742(down)
PPAR signaling pathway	ko03320	1	1	C02165(down)
Neuroactive ligand-receptor interaction	ko04080	2	4	C02165(down)+C00584(down)
Serotonergic synapse	ko04726	4	10	C00584(down)+C00219(down)+C02165(down)+C05963(down)
Eicosanoids	ko07034	2	3	C00219(down)+C02165(down)
cAMP signaling pathway	ko04024	1	6	C00584(down)
C-type lectin receptor signaling pathway	ko04625	1	6	C00584(down)
Oxytocin signaling pathway	ko04921	2	8	C00219(down)+C00584(down)
Regulation of lipolysis in adipocytes	ko04923	2	99	C00219(down)+C00584(down)
Renin secretion	ko04924	1	1	C00584(down)
African trypanosomiasis	ko05143	1	6	C00584(down)
Amoebiasis	ko05146	4	21	C02737(down)+C02737(down)+C00219(down)+C00584(down)
Human cytomegalovirus infection	ko05163	1	6	C00584(down)
Human papillomavirus infection	ko05165	1	1	C00584(down)
Rheumatoid arthritis	ko05323	1	1	C00584(down)
Biosynthesis of unsaturated fatty acids	ko01040	1	7	C00219(down)
Ferroptosis	ko04216	1	3	C00219(down)
Vascular smooth muscle contraction	ko04270	1	7	C00219(down)
Platelet activation	ko04611	1	7	C00219(down)
Fc epsilon RI signaling pathway	ko04664	1	7	C00219(down)
Fc gamma R-mediated phagocytosis	ko04666	1	7	C00219(down)
Phototransduction - fly	ko04745	1	8	C00219(down)
GnRH signaling pathway	ko04912	1	7	C00219(down)
Glycine, serine and threonine metabolism	ko00260	2	13	C02737(down)+C02737(down)
Systemic lupus erythematosus	ko05322	2	13	C02737(down)+C02737(down)

## Sheet: Table S7
Table S7. Metabolic pathway identified from the significantly different lipids between NP-M and P-M.
Pathway	ko_ID	Unique compound	compound	cpd_id
Sphingolipid metabolism	ko00600	23	68	C01190(down)+C00195(down)+C01190(down)+C00195(down)+C00195(down)+C00195(down)+C00195(down)+C00195(down)+C01190(down)+C00195(down)+C01190(down)+C00195(down)+C06125(down)+C00195(down)+C00195(down)+C00195(down)+C00195(down)+C00195(down)+C00195(down)+C00195(down)+C00550(up)+C00195(down)+C06125(down)
Metabolic pathways	ko01100	55	369	C00350(up)+C00195(down)+C00157(up)+C00157(down)+C00195(down)+C00195(down)+C00350(up)+C00157(up)+C00157(up)+C00195(down)+C00219(down)+C01190(down)+C05963(down)+C00350(up)+C00195(down)+C00195(down)+C00157(up)+C00157(up)+C00157(down)+C00195(down)+C00157(up)+C00157(down)+C00350(up)+C00195(down)+C00350(up)+C01190(down)+C00350(up)+C01190(down)+C00195(down)+C00350(up)+C00195(down)+C00350(up)+C00350(up)+…
Sphingolipid signaling pathway	ko04071	17	59	C00195(down)+C00195(down)+C00195(down)+C00195(down)+C00195(down)+C00195(down)+C00195(down)+C00195(down)+C00195(down)+C00195(down)+C00195(down)+C00195(down)+C00195(down)+C00195(down)+C00550(up)+C00195(down)+C00195(down)
Necroptosis	ko04217	18	54	C00195(down)+C00195(down)+C00195(down)+C00195(down)+C00195(down)+C00195(down)+C00195(down)+C00195(down)+C00195(down)+C00195(down)+C00195(down)+C00195(down)+C00195(down)+C00195(down)+C00550(up)+C00219(down)+C00195(down)+C00195(down)
Neurotrophin signaling pathway	ko04722	16	37	C00195(down)+C00195(down)+C00195(down)+C00195(down)+C00195(down)+C00195(down)+C00195(down)+C00195(down)+C00195(down)+C00195(down)+C00195(down)+C00195(down)+C00195(down)+C00195(down)+C00195(down)+C00195(down)
Adipocytokine signaling pathway	ko04920	16	37	C00195(down)+C00195(down)+C00195(down)+C00195(down)+C00195(down)+C00195(down)+C00195(down)+C00195(down)+C00195(down)+C00195(down)+C00195(down)+C00195(down)+C00195(down)+C00195(down)+C00195(down)+C00195(down)
Insulin resistance	ko04931	16	123	C00195(down)+C00195(down)+C00195(down)+C00195(down)+C00195(down)+C00195(down)+C00195(down)+C00195(down)+C00195(down)+C00195(down)+C00195(down)+C00195(down)+C00195(down)+C00195(down)+C00195(down)+C00195(down)
AGE-RAGE signaling pathway in diabetic complications	ko04933	16	37	C00195(down)+C00195(down)+C00195(down)+C00195(down)+C00195(down)+C00195(down)+C00195(down)+C00195(down)+C00195(down)+C00195(down)+C00195(down)+C00195(down)+C00195(down)+C00195(down)+C00195(down)+C00195(down)
Leishmaniasis	ko05140	18	48	C00195(down)+C00195(down)+C00195(down)+C02737(up)+C00219(down)+C00195(down)+C00195(down)+C00195(down)+C00195(down)+C00195(down)+C00195(down)+C00195(down)+C00195(down)+C00195(down)+C00195(down)+C00195(down)+C00195(down)+C00195(down)
Diabetic cardiomyopathy	ko05415	16	37	C00195(down)+C00195(down)+C00195(down)+C00195(down)+C00195(down)+C00195(down)+C00195(down)+C00195(down)+C00195(down)+C00195(down)+C00195(down)+C00195(down)+C00195(down)+C00195(down)+C00195(down)+C00195(down)
Glycerophospholipid metabolism	ko00564	46	235	C00157(up)+C04230(down)+C00157(up)+C04230(down)+C04230(down)+C04230(down)+C04230(down)+C04230(down)+C00157(down)+C00157(up)+C00350(up)+C00157(down)+C00157(down)+C04230(down)+C00350(up)+C04230(down)+C00350(up)+C04230(down)+C04230(down)+C00157(up)+C04230(down)+C00350(up)+C00157(up)+C00157(up)+C00157(up)+C00157(down)+C04230(down)+C00350(up)+C00350(up)+C00157(up)+C00350(up)+C00350(up)+C00157(up)+C003…
Choline metabolism in cancer	ko05231	31	126	C04230(down)+C04230(down)+C00157(up)+C04230(down)+C04230(down)+C00157(down)+C04230(down)+C00157(up)+C04230(down)+C00157(up)+C00157(up)+C04230(down)+C04230(down)+C04230(down)+C04230(down)+C04230(down)+C00157(up)+C00157(up)+C00157(up)+C04230(down)+C00157(up)+C00157(down)+C04230(down)+C00157(up)+C00157(down)+C04230(down)+C00157(down)+C04230(down)+C00157(up)+C04230(down)+C04230(down)
Ether lipid metabolism	ko00565	1	1	C04317(down)
Arachidonic acid metabolism	ko00590	18	94	C00157(down)+C00157(up)+C00157(up)+C00157(up)+C00157(up)+C00157(down)+C05963(down)+C00157(up)+C14777(down)+C00219(down)+C00157(up)+C04742(down)+C00157(up)+C00157(up)+C00157(down)+C00157(up)+C00157(up)+C00157(down)
Linoleic acid metabolism	ko00591	16	92	C00157(down)+C00157(up)+C00157(down)+C00157(up)+C00157(up)+C00157(up)+C00157(up)+C00219(down)+C14828(down)+C00157(up)+C00157(down)+C00157(up)+C00157(up)+C00157(up)+C00157(down)+C00157(up)
alpha-Linolenic acid metabolism	ko00592	14	84	C00157(up)+C00157(up)+C00157(down)+C00157(up)+C00157(up)+C00157(down)+C00157(up)+C00157(up)+C00157(up)+C00157(up)+C00157(up)+C00157(up)+C00157(down)+C00157(down)
Biosynthesis of secondary metabolites	ko01110	29	198	C00157(up)+C00157(up)+C00157(up)+C00157(down)+C00157(up)+C00350(up)+C00350(up)+C00350(up)+C00350(up)+C00157(up)+C00157(up)+C00350(up)+C00157(down)+C00350(up)+C00157(down)+C00350(up)+C00350(up)+C00350(up)+C00157(down)+C00350(up)+C00350(up)+C00157(up)+C00350(up)+C00350(up)+C00350(up)+C00157(up)+C00157(up)+C00157(up)+C02737(up)
Retrograde endocannabinoid signaling	ko04723	29	167	C00350(up)+C00350(up)+C00350(up)+C00350(up)+C00157(up)+C00157(up)+C00157(down)+C00157(up)+C00157(up)+C00157(down)+C00350(up)+C00157(down)+C00350(up)+C00157(up)+C00157(up)+C00350(up)+C00350(up)+C00157(up)+C00350(up)+C00350(up)+C00157(down)+C00350(up)+C00350(up)+C00350(up)+C00157(up)+C00157(up)+C00157(up)+C00219(down)+C00350(up)
Glycosylphosphatidylinositol (GPI)-anchor biosynthesis	ko00563	14	76	C00350(up)+C00350(up)+C00350(up)+C00350(up)+C00350(up)+C00350(up)+C00350(up)+C00350(up)+C00350(up)+C00350(up)+C00350(up)+C00350(up)+C00350(up)+C00350(up)
Autophagy - other	ko04136	14	76	C00350(up)+C00350(up)+C00350(up)+C00350(up)+C00350(up)+C00350(up)+C00350(up)+C00350(up)+C00350(up)+C00350(up)+C00350(up)+C00350(up)+C00350(up)+C00350(up)
Autophagy - yeast	ko04138	14	76	C00350(up)+C00350(up)+C00350(up)+C00350(up)+C00350(up)+C00350(up)+C00350(up)+C00350(up)+C00350(up)+C00350(up)+C00350(up)+C00350(up)+C00350(up)+C00350(up)
Autophagy - animal	ko04140	14	76	C00350(up)+C00350(up)+C00350(up)+C00350(up)+C00350(up)+C00350(up)+C00350(up)+C00350(up)+C00350(up)+C00350(up)+C00350(up)+C00350(up)+C00350(up)+C00350(up)
Pathogenic Escherichia coli infection	ko05130	14	78	C00350(up)+C00350(up)+C00350(up)+C00350(up)+C00350(up)+C00350(up)+C00350(up)+C00350(up)+C00350(up)+C00350(up)+C00350(up)+C00350(up)+C00350(up)+C00350(up)
Kaposi sarcoma-associated herpesvirus infection	ko05167	14	81	C00350(up)+C00350(up)+C00350(up)+C00350(up)+C00350(up)+C00350(up)+C00350(up)+C00350(up)+C00350(up)+C00350(up)+C00350(up)+C00350(up)+C00350(up)+C00350(up)
Secondary bile acid biosynthesis	ko00121	1	3	C17644(down)
Ovarian steroidogenesis	ko04913	2	4	C00219(down)+C14777(down)
Aldosterone synthesis and secretion	ko04925	2	9	C00219(down)+C14777(down)
Inflammatory mediator regulation of TRP channels	ko04750	2	11	C04742(down)+C00219(down)
Serotonergic synapse	ko04726	2	10	C00219(down)+C05963(down)
Bile secretion	ko04976	1	5	C05963(down)
Biosynthesis of unsaturated fatty acids	ko01040	1	7	C00219(down)
Ferroptosis	ko04216	1	3	C00219(down)
Vascular smooth muscle contraction	ko04270	1	7	C00219(down)
Platelet activation	ko04611	1	7	C00219(down)
Fc epsilon RI signaling pathway	ko04664	1	7	C00219(down)
Fc gamma R-mediated phagocytosis	ko04666	1	7	C00219(down)
Long-term depression	ko04730	1	30	C00219(down)
Phototransduction - fly	ko04745	1	8	C00219(down)
GnRH signaling pathway	ko04912	1	7	C00219(down)
Oxytocin signaling pathway	ko04921	1	8	C00219(down)
Regulation of lipolysis in adipocytes	ko04923	1	99	C00219(down)
Amoebiasis	ko05146	2	21	C00219(down)+C02737(up)
Eicosanoids	ko07034	1	3	C00219(down)
Cutin, suberine and wax biosynthesis	ko00073	1	4	C19621(down)
Glycine, serine and threonine metabolism	ko00260	1	13	C02737(up)
Systemic lupus erythematosus	ko05322	1	13	C02737(up)

## Sheet: Table S8
Table S8. Metabolic pathway identified from the significantly different lipids between P-M and P-F.
Pathway	ko_ID	Unique compound	compound	Uni_all	compound_all	cpd_id
Insulin resistance	ko04931	2	121	39	448	C02571(down)+C00195(up)
Thermogenesis	ko04714	1	115	39	448	C02301(down)
Sphingolipid metabolism	ko00600	4	66	39	448	C01190(up)+C00550(up)+C00550(up)+C00195(up)
Metabolic pathways	ko01100	24	365	39	448	C00157(up)+C00157(up)+C00550(up)+C00157(up)+C00157(up)+C00350(up)+C00157(up)+C00195(up)+C00157(up)+C00350(up)+C00157(up)+C00350(up)+C00157(up)+C00550(up)+C00350(up)+C00157(up)+C00350(up)+C14825(up)+C01190(up)+C00157(up)+C00350(up)+C00157(up)+C00350(up)+C00157(up)
Glycerophospholipid metabolism	ko00564	28	234	39	448	C04230(up)+C00157(up)+C04230(up)+C00350(up)+C00157(up)+C04230(down)+C00157(up)+C00350(up)+C00157(up)+C04230(up)+C00350(up)+C00157(up)+C04230(up)+C00350(up)+C00157(up)+C00157(up)+C00157(up)+C00157(up)+C04230(up)+C00350(up)+C00157(up)+C04230(up)+C00350(up)+C04230(up)+C00157(up)+C00350(up)+C00157(up)+C04230(up)
Choline metabolism in cancer	ko05231	21	125	39	448	C00157(up)+C04230(up)+C00157(up)+C04230(up)+C00157(up)+C00157(up)+C04230(up)+C04230(up)+C00157(up)+C00157(up)+C04230(up)+C04230(up)+C00157(up)+C00157(up)+C00157(up)+C04230(down)+C00157(up)+C04230(up)+C00157(up)+C04230(up)+C00157(up)
Arachidonic acid metabolism	ko00590	12	91	39	448	C00157(up)+C00157(up)+C00157(up)+C00157(up)+C00157(up)+C00157(up)+C00157(up)+C00157(up)+C00157(up)+C00157(up)+C00157(up)+C00157(up)
Linoleic acid metabolism	ko00591	14	91	39	448	C00157(up)+C00157(up)+C00157(up)+C00157(up)+C00157(up)+C00157(up)+C14766(up)+C00157(up)+C00157(up)+C00157(up)+C00157(up)+C00157(up)+C14825(up)+C00157(up)
alpha-Linolenic acid metabolism	ko00592	12	84	39	448	C00157(up)+C00157(up)+C00157(up)+C00157(up)+C00157(up)+C00157(up)+C00157(up)+C00157(up)+C00157(up)+C00157(up)+C00157(up)+C00157(up)
Biosynthesis of secondary metabolites	ko01110	19	198	39	448	C00157(up)+C00350(up)+C00157(up)+C00350(up)+C00157(up)+C00350(up)+C00157(up)+C00350(up)+C00157(up)+C00350(up)+C00157(up)+C00350(up)+C00157(up)+C00157(up)+C00157(up)+C00157(up)+C00157(up)+C00157(up)+C00350(up)
Retrograde endocannabinoid signaling	ko04723	19	166	39	448	C00157(up)+C00157(up)+C00157(up)+C00157(up)+C00157(up)+C00157(up)+C00350(up)+C00350(up)+C00157(up)+C00157(up)+C00157(up)+C00157(up)+C00350(up)+C00350(up)+C00350(up)+C00157(up)+C00350(up)+C00350(up)+C00157(up)
Glycosylphosphatidylinositol (GPI)-anchor biosynthesis	ko00563	7	76	39	448	C00350(up)+C00350(up)+C00350(up)+C00350(up)+C00350(up)+C00350(up)+C00350(up)
Autophagy - other	ko04136	7	76	39	448	C00350(up)+C00350(up)+C00350(up)+C00350(up)+C00350(up)+C00350(up)+C00350(up)
Autophagy - yeast	ko04138	7	76	39	448	C00350(up)+C00350(up)+C00350(up)+C00350(up)+C00350(up)+C00350(up)+C00350(up)
Autophagy - animal	ko04140	7	76	39	448	C00350(up)+C00350(up)+C00350(up)+C00350(up)+C00350(up)+C00350(up)+C00350(up)
Pathogenic Escherichia coli infection	ko05130	7	78	39	448	C00350(up)+C00350(up)+C00350(up)+C00350(up)+C00350(up)+C00350(up)+C00350(up)
Kaposi sarcoma-associated herpesvirus infection	ko05167	7	81	39	448	C00350(up)+C00350(up)+C00350(up)+C00350(up)+C00350(up)+C00350(up)+C00350(up)
Sphingolipid signaling pathway	ko04071	3	57	39	448	C00195(up)+C00550(up)+C00550(up)
Necroptosis	ko04217	3	51	39	448	C00550(up)+C00550(up)+C00195(up)
Neurotrophin signaling pathway	ko04722	1	35	39	448	C00195(up)
Adipocytokine signaling pathway	ko04920	1	35	39	448	C00195(up)
AGE-RAGE signaling pathway in diabetic complications	ko04933	1	35	39	448	C00195(up)
Leishmaniasis	ko05140	1	45	39	448	C00195(up)
Diabetic cardiomyopathy	ko05415	1	36	39	448	C00195(up)

## Sheet: Table S9
Table S9. Metabolic pathway identified from the significantly different lipids between NP-M and NP-F.
Pathway	ko_ID	Unique compound	compound	Uni_all	compound_all	cpd_id
Thermogenesis	ko04714	1	114	6	453	C02301(up)
Glycerophospholipid metabolism	ko00564	5	234	6	453	C00350(up)+C00157(down)+C00157(down)+C00641(down)+C00350(up)
Arachidonic acid metabolism	ko00590	2	94	6	453	C00157(down)+C00157(down)
Linoleic acid metabolism	ko00591	2	92	6	453	C00157(down)+C00157(down)
alpha-Linolenic acid metabolism	ko00592	2	84	6	453	C00157(down)+C00157(down)
Metabolic pathways	ko01100	5	368	6	453	C00157(down)+C00350(up)+C00641(down)+C00350(up)+C00157(down)
Biosynthesis of secondary metabolites	ko01110	5	197	6	453	C00641(down)+C00350(up)+C00157(down)+C00157(down)+C00350(up)
Retrograde endocannabinoid signaling	ko04723	4	166	6	453	C00350(up)+C00157(down)+C00157(down)+C00350(up)
Choline metabolism in cancer	ko05231	2	126	6	453	C00157(down)+C00157(down)
Glycosylphosphatidylinositol (GPI)-anchor biosynthesis	ko00563	2	75	6	453	C00350(up)+C00350(up)
Autophagy - other	ko04136	2	75	6	453	C00350(up)+C00350(up)
Autophagy - yeast	ko04138	2	75	6	453	C00350(up)+C00350(up)
Autophagy - animal	ko04140	2	75	6	453	C00350(up)+C00350(up)
Pathogenic Escherichia coli infection	ko05130	2	77	6	453	C00350(up)+C00350(up)
Kaposi sarcoma-associated herpesvirus infection	ko05167	2	80	6	453	C00350(up)+C00350(up)
Glycerolipid metabolism	ko00561	1	116	6	453	C00641(down)
Inositol phosphate metabolism	ko00562	1	23	6	453	C00641(down)
Phosphatidylinositol signaling system	ko04070	1	23	6	453	C00641(down)
Long-term depression	ko04730	1	30	6	453	C00641(down)
